# Supplementary material for: Palladium-catalysed cyclisation of ynamides and propargyl tethered iodosulfonamides with boronic acids leading to benzosultams
Source: Royal Society of Chemistry journal article supplement (doi:10.1039/d1ob00925g), 2021-01-01
Supplement: d1ob00925g1.pdf [file d1ob00925g1.pdf]

**Electronic Supplementary Information**

**Palladium-catalysed cyclisation of ynamides and propargyl tethered iodosulfonamides  
with boronic acids leading to benzosultams**

K. Sandeep, Alla Siva Reddy and K. C. Kumara Swamy\*

School of Chemistry, University of Hyderabad

Hyderabad, 500 046, Telangana, India.

E-mail: [kckssc@uohyd.ac.in](mailto:kckssc@uohyd.ac.in); [kckssc@yahoo.com](mailto:kckssc@yahoo.com)

|          |                                                                                                                    |               |
|----------|--------------------------------------------------------------------------------------------------------------------|---------------|
| <b>1</b> | <b>X-ray data for Compounds 3aa, 3ba, 3ad, 3jb and 5ah</b>                                                         | <b>S2-S4</b>  |
| <b>2</b> | <b>Copies of <math>^1\text{H}/^{13}\text{C}\{^1\text{H}\}</math> NMR spectra for compounds 3aa-3ob and 5aa-5cb</b> | <b>S5-S50</b> |

### X-ray data:

Crystallographic data were collected on a Bruker APX-II-SMART or Oxford-Rigaku using Mo- $K_{\alpha}$  radiation ( $\lambda = 0.71073 \text{ \AA}$ ) and have been deposited at the Cambridge Crystallographic Data Centre (CCDC). The structures were solved and refined by standard methods.<sup>[1]</sup> Copies of the information may be obtained free of charge from The Director, CCDC, 12 Union Road, Cambridge CB2 1 EZ, UK (Fax: +44-1223-336033; email: [deposit@ccdc.cam.ac.uk](mailto:deposit@ccdc.cam.ac.uk) or [www.ccdc.cam.ac.uk](http://www.ccdc.cam.ac.uk)).

### (1) ORTEPs and crystal data for compounds 3aa, 3ba, 3ad, 3jb and 5ah

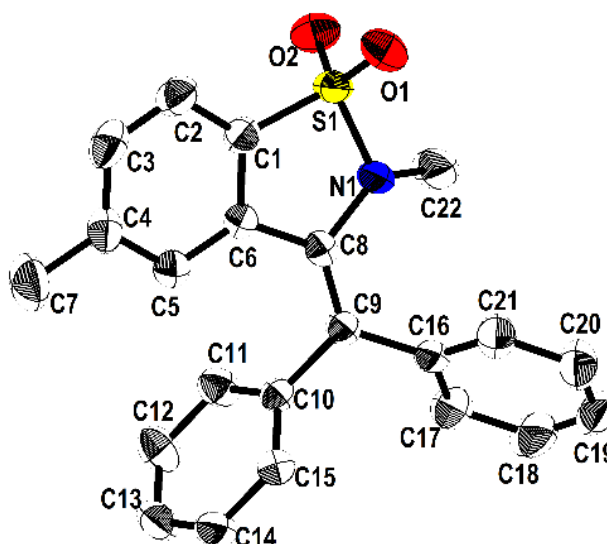

**Figure S1.** ORTEP (ellipsoid contour probability 50%) of compound **3aa** (CCDC no. 2082515). Colourless block,  $C_{22}H_{19}NO_2S$ ,  $M_r = 361.44$ , Monoclinic, space group  $P2(1)/n$ ,  $a = 11.613(2)$ ,  $b = 10.494(2)$ ,  $c = 15.562(3) \text{ \AA}$ ,  $\beta = 91.952(6)$ ,  $V = 1895.2(6) \text{ \AA}^3$ ,  $Z = 4$ ,  $\mu = 0.186 \text{ mm}^{-1}$ , Data/restraints/parameters: 3331/0/238. R indices ( $I > 2\sigma(I)$ ):  $R_1 = 0.0436$ ,  $wR_2$  (all data) = 0.1138. Selected bond lengths [ $\text{\AA}$ ] with esds in parentheses: C(6)-C(8) 1.489(3), C(8)-C(9) 1.348(3), C(9)-C(10) 1.490(3), C(9)-C(16) 1.489(3).

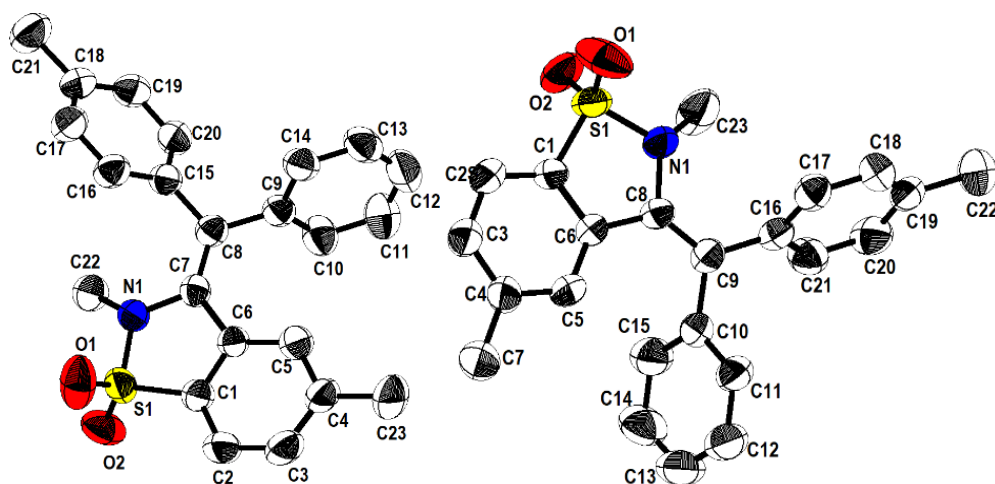

**Figure S2.** ORTEP (ellipsoid contour probability 50%) of compound **3ba** (CCDC no. 2082516). Colourless block,  $C_{16}H_{18}N_2O_4S_2$ ,  $M_r = 395.88$ , Triclinic, space group  $P-1$ ,  $a = 9.9875(2)$ ,  $b = 14.1732(3)$ ,  $c = 14.8341(3)$  Å,  $\alpha = 83.860(2)$ ,  $\beta = 80.349(2)$ ,  $\gamma = 74.882(2)$ ,  $V = 1994.06(7)$  Å<sup>3</sup>,  $Z = 2$ ,  $\mu = 0.179$  mm<sup>-1</sup>, Data/restraints/parameters: 7013/0/494. R indices ( $I > 2\sigma(I)$ ): R1 = 0.0543, wR2 (all data) = 0.1546. Selected bond lengths [Å] with esds in parentheses: C(6)-C(7) 1.488(3), C(7)-C(8) 1.344(3), C(8)-C(9) 1.487(3), C(8)-C(15) 1.488(3), C(29)-C(30) 1.485(3), C(30)-C(31) 1.343(3), C(31)-C(32) 1.481(3), C(31)-C(39) 1.495(3).

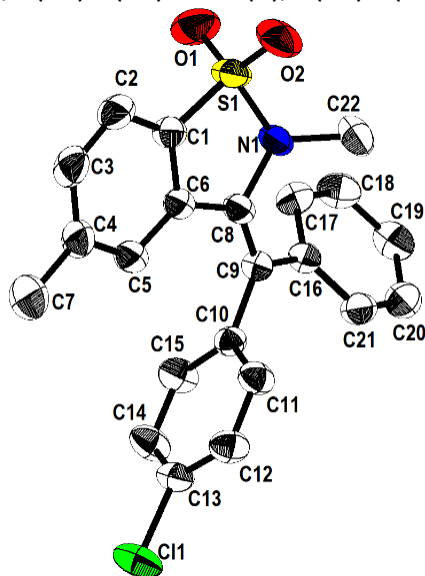

**Figure S3.** ORTEP (ellipsoid contour probability 50%) of compound **3ad** (CCDC no. 2082517). Colourless block,  $C_{22}H_{18}ClNO_2S$ ,  $M_r = 395.88$ , Triclinic, space group  $P-1$ ,  $a = 10.0494(11)$ ,  $b = 10.1081(10)$ ,  $c = 10.9713(10)$  Å,  $\alpha = 104.997(3)$ ,  $\beta = 112.432(3)$ ,  $\gamma = 95.785(4)$ ,  $V = 969.88(17)$  Å<sup>3</sup>,  $Z = 2$ ,  $\mu = 0.321$  mm<sup>-1</sup>, Data/restraints/parameters: 3388/0/247. R indices ( $I > 2\sigma(I)$ ): R1 = 0.0343, wR2 (all data) = 0.0918. Selected bond lengths [Å] with esds in parentheses: C(6)-C(8) 1.481(2), C(8)-C(9) 1.353(2), C(9)-C(10) 1.494(2), C(9)-C(16) 1.484(2).

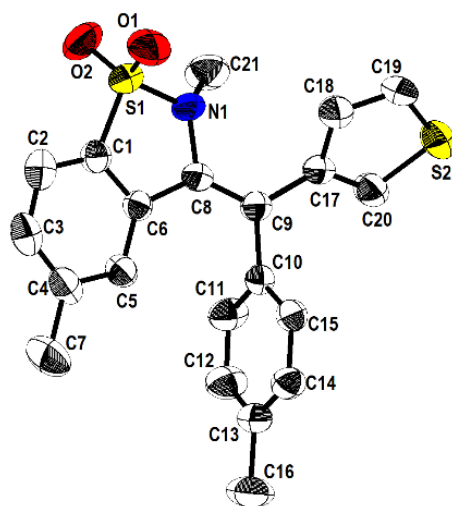

**Figure S4.** ORTEP (ellipsoid contour probability 50%) of compound **3jb** (CCDC no. 2082518).. Colourless block,  $C_{21}H_{19}NO_2S_2$ ,  $M_r = 381.49$ , Triclinic, space group  $P-1$ ,  $a = 9.8974(2)$ ,  $b = 9.9589(3)$ ,  $c = 11.7524(3)$  Å,  $\alpha = 90.477(2)$ ,  $\beta = 106.658(2)$ ,  $\gamma = 116.051(2)$ ,  $V = 984.84(4)$  Å<sup>3</sup>,  $Z = 2$ ,  $\mu = 0.285$  mm<sup>-1</sup>, Data/restraints/parameters: 3470/0/239. R indices ( $I > 2\sigma(I)$ ):  $R_1 = 0.0457$ ,  $wR_2$  (all data) = 0.1339. Selected bond lengths [Å] with esds in parentheses: C(6)-C(8) 1.479(3), C(8)-C(9) 1.348(3), C(9)-C(10) 1.487(3), C(9)-C(17) 1.472(3).

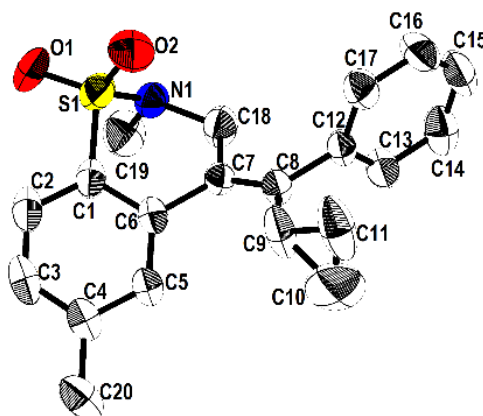

**Figure S5.** ORTEP (ellipsoid contour probability 50%) of compound **5ah** (CCDC no. 2082519). Colourless block,  $C_{20}H_{21}NO_2S$ ,  $M_r = 339.44$ , Monoclinic, space group  $P12(1)/c1$ ,  $a = 20.5737(8)$ ,  $b = 6.0343(2)$ ,  $c = 14.7085(8)$  Å,  $\beta = 104.444(4)$ ,  $V = 1768.31(13)$  Å<sup>3</sup>,  $Z = 4$ ,  $\mu = 0.194$  mm<sup>-1</sup>, Data/restraints/parameters: 3112/0/220. R indices ( $I > 2\sigma(I)$ ):  $R_1 = 0.0555$ ,  $wR_2$  (all data) = 0.1692. Selected bond lengths [Å] with esds in parentheses: C(8)-C(9) 1.472(4), C(7)-C(18) 1.528(4), C(7)-C(8) 1.336(3), C(8)-C(12) 1.496(3).

- (1) (a) G. M. Sheldrick, *SADABS, Siemens Area Detector Absorption Correction*; University of Göttingen: Göttingen, Germany, 1996; b) Sheldrick, G. M. *SHELX-97, A Program for Crystal Structure Solution and Refinement*; University of Göttingen, *SHELXTL NT Crystal Structure Analysis Package*, version 5.10; Bruker AXS: Madison, WI, 1999.

(2) Copies of  $^1\text{H}/^{13}\text{C}$   $\{^1\text{H}\}/^{19}\text{F}$  NMR spectra for compounds 3aa-3la and 5aa-5cb

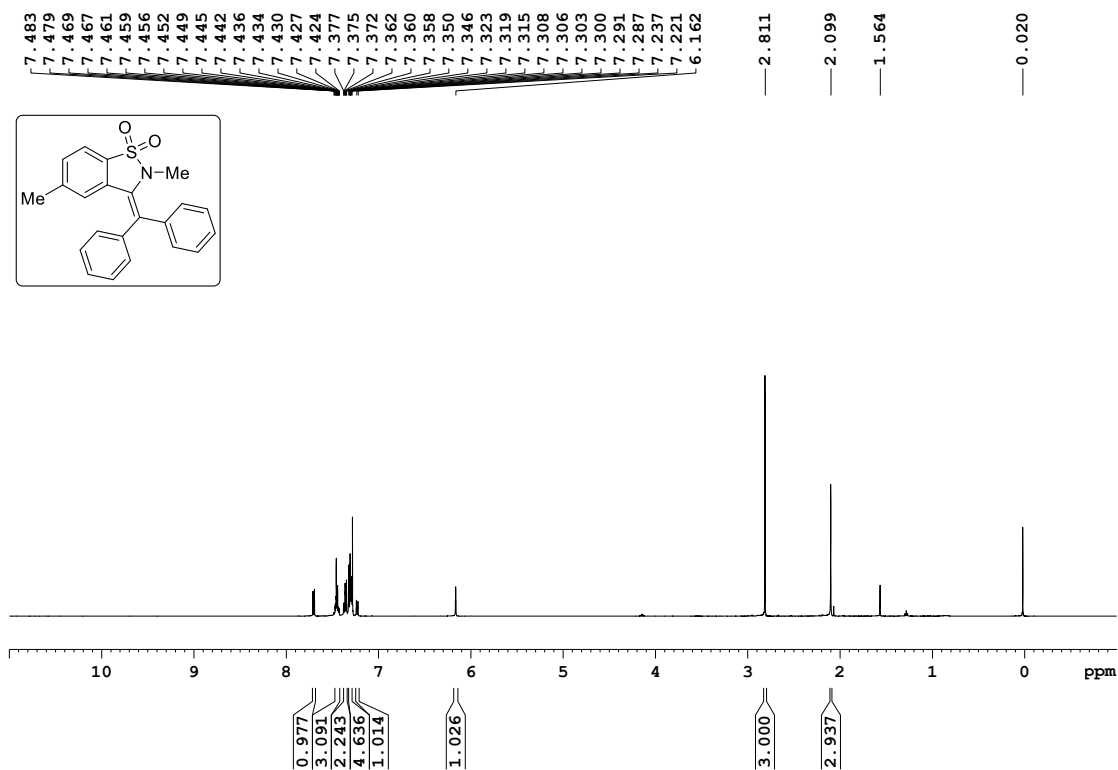

Figure S6.  $^1\text{H}$  NMR spectrum of compound 3aa

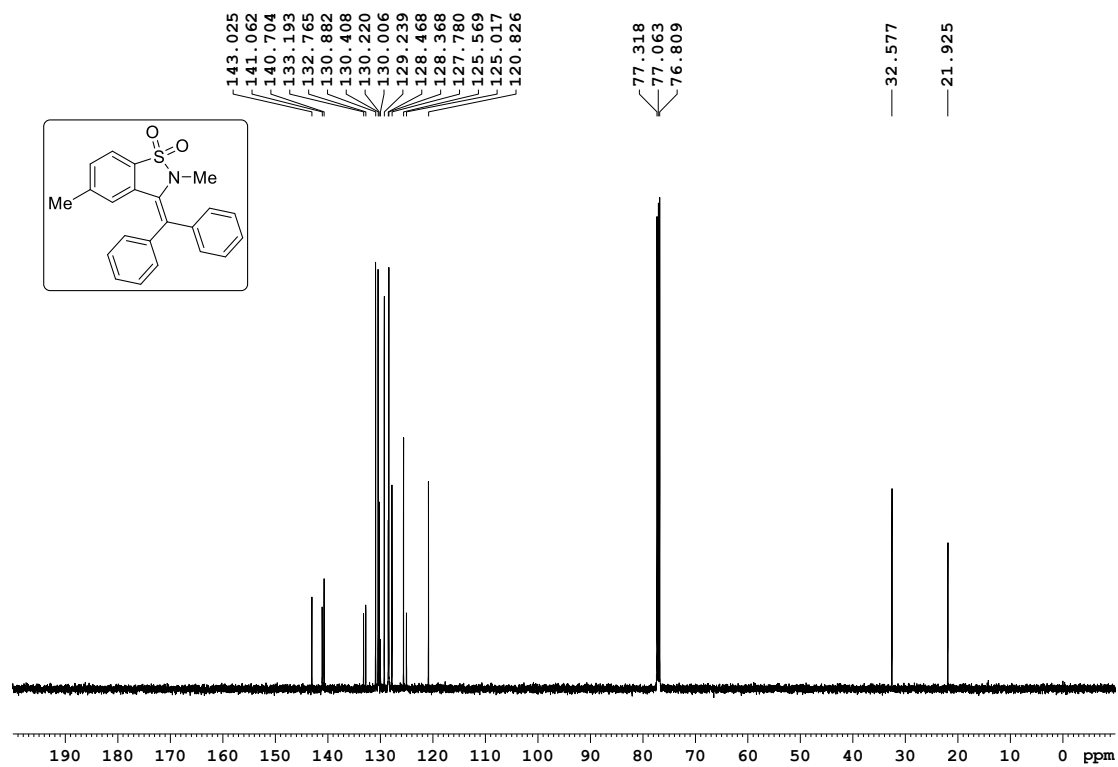

Figure S7.  $^{13}\text{C}$  NMR spectrum of compound 3aa

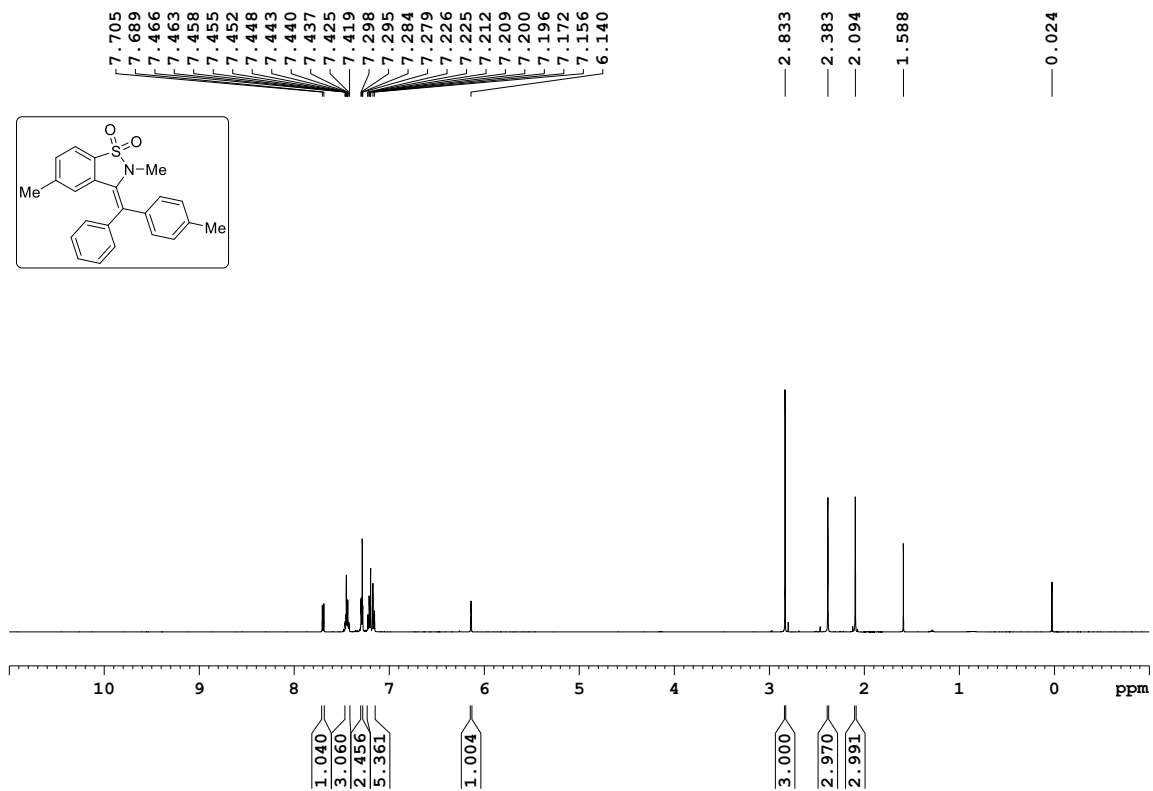

Figure S8. <sup>1</sup>H NMR spectrum of compound 3ba

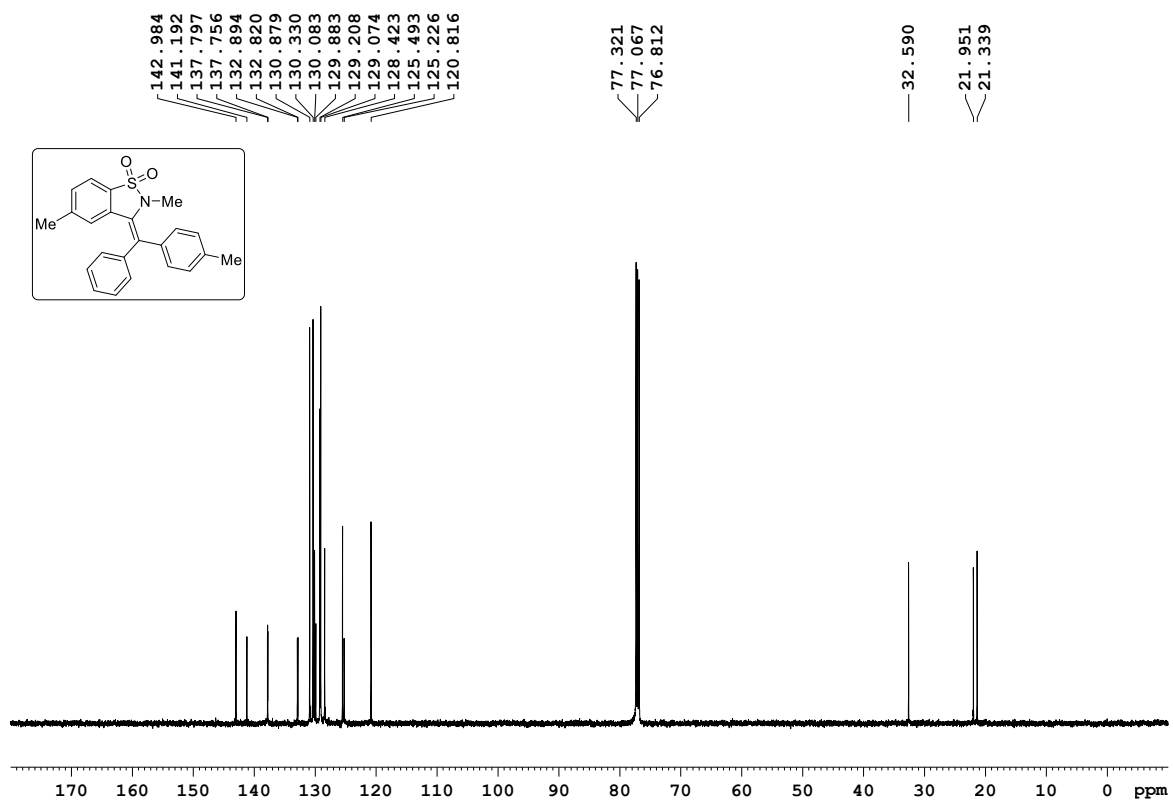

Figure S9. <sup>13</sup>C NMR spectrum of compound 3ba

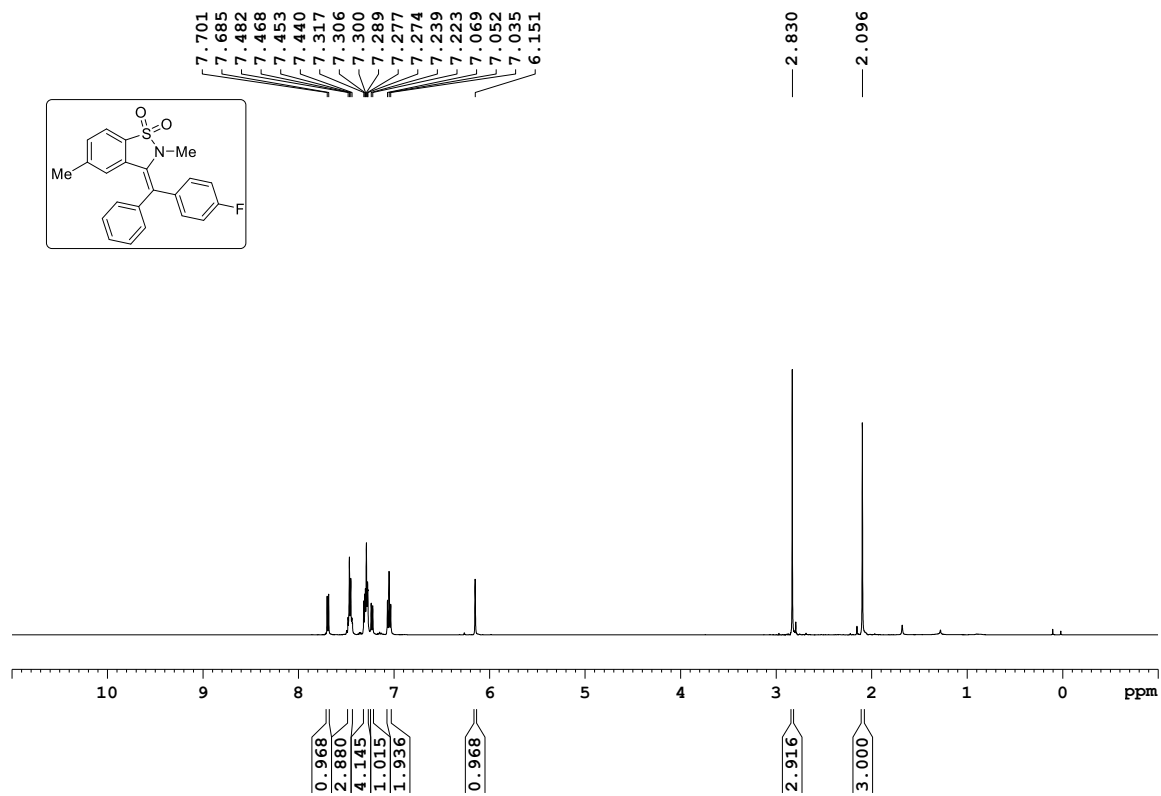

Figure S10. <sup>1</sup>H NMR spectrum of compound 3da

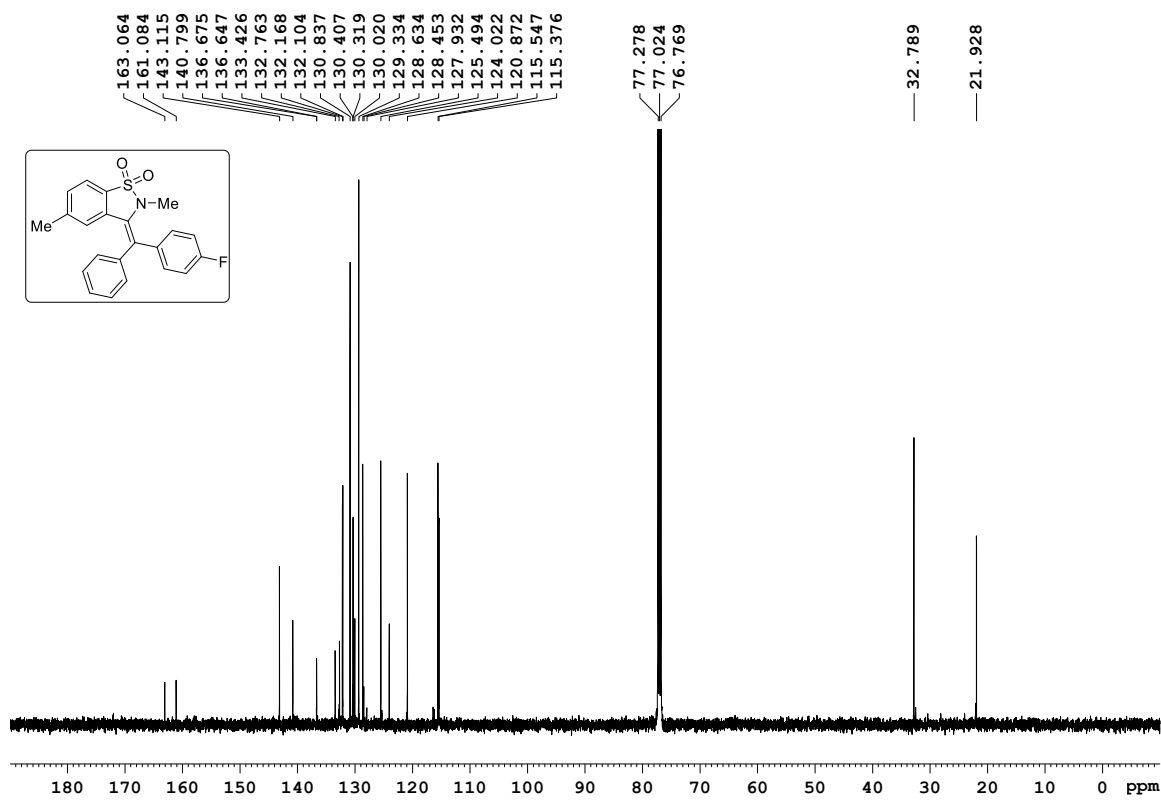

Figure S11. <sup>13</sup>C NMR spectrum of compound 3da

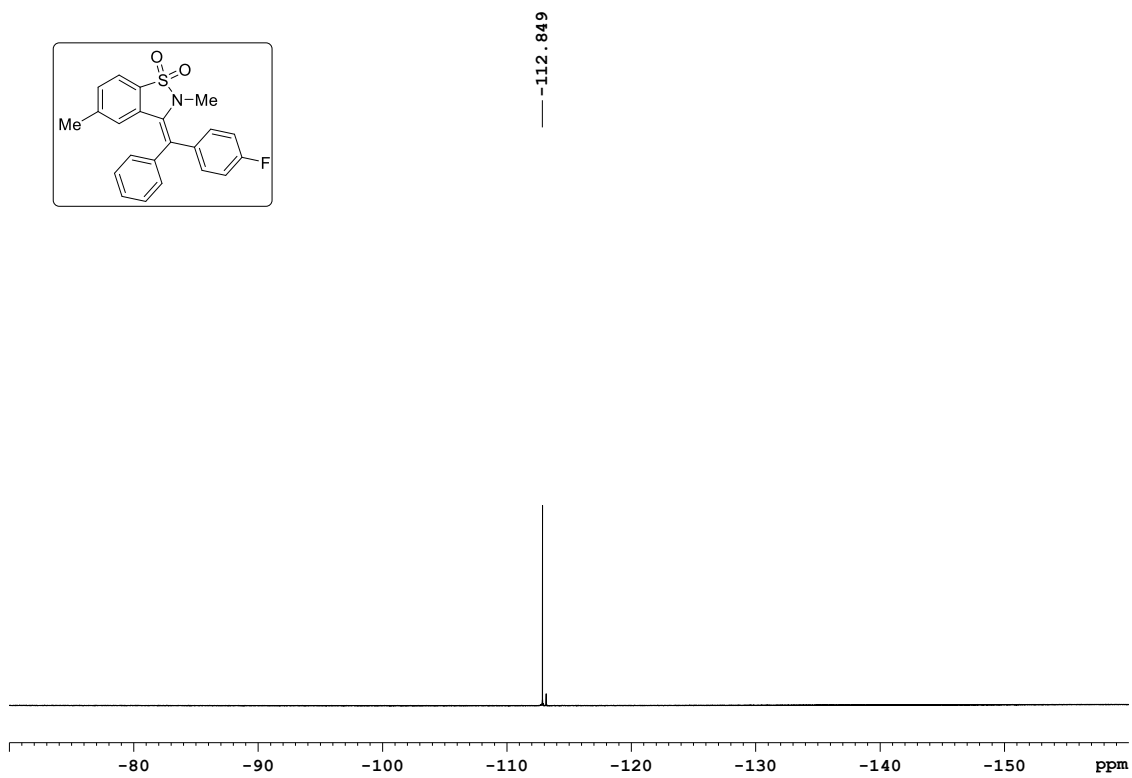

**Figure S12.**  $^{19}\text{F}$  NMR spectrum of compound 3da



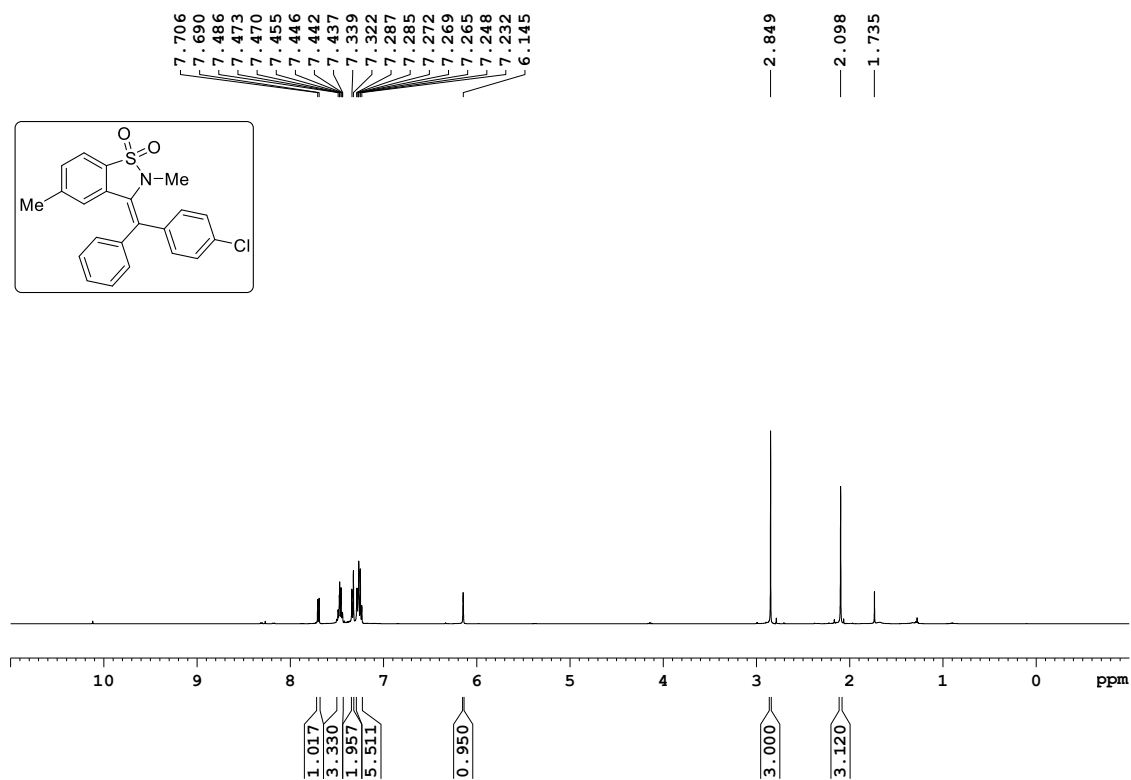

Figure S13. <sup>1</sup>H NMR spectrum of compound 3ea

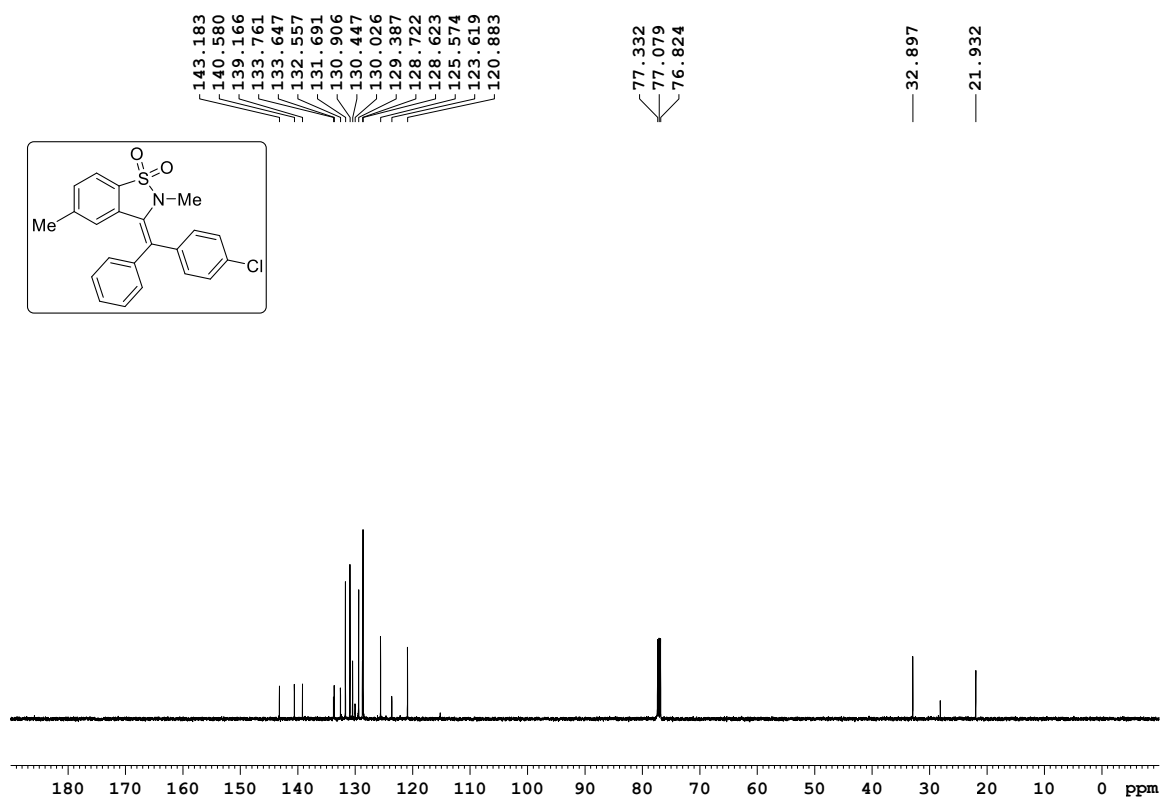

Figure S14. <sup>13</sup>C NMR spectrum of compound 3ea

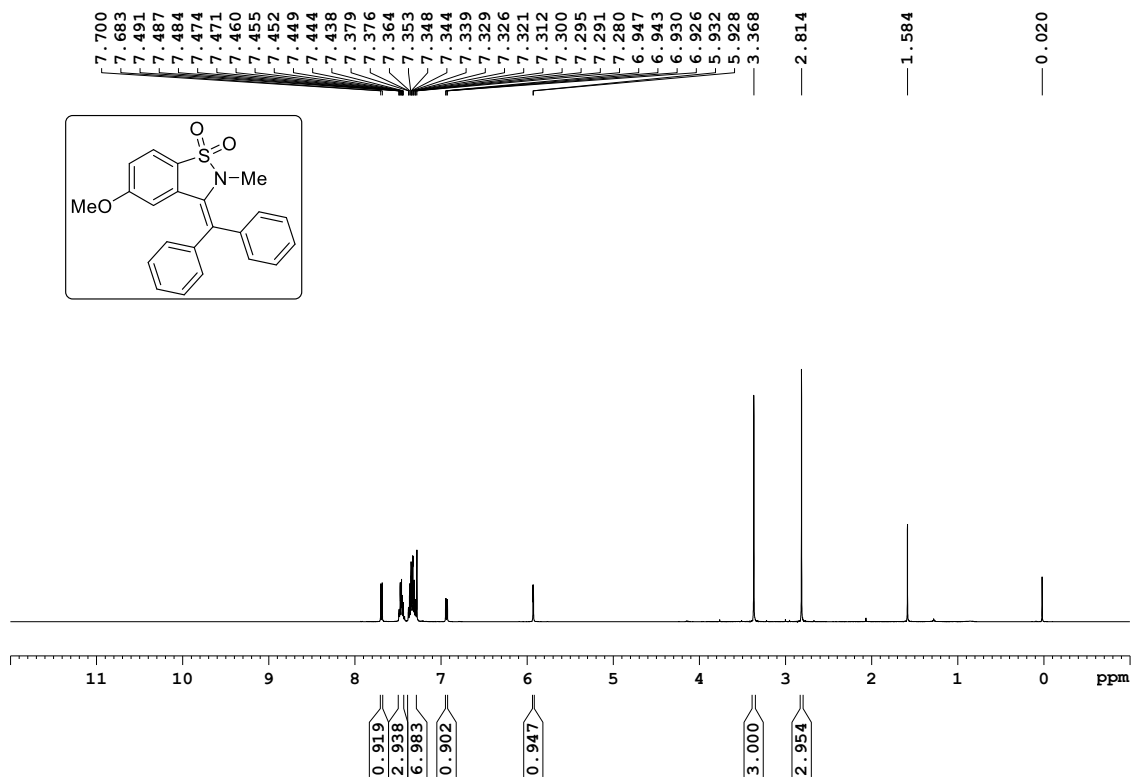

Figure S15.  $^1\text{H}$  NMR spectrum of compound 3fa

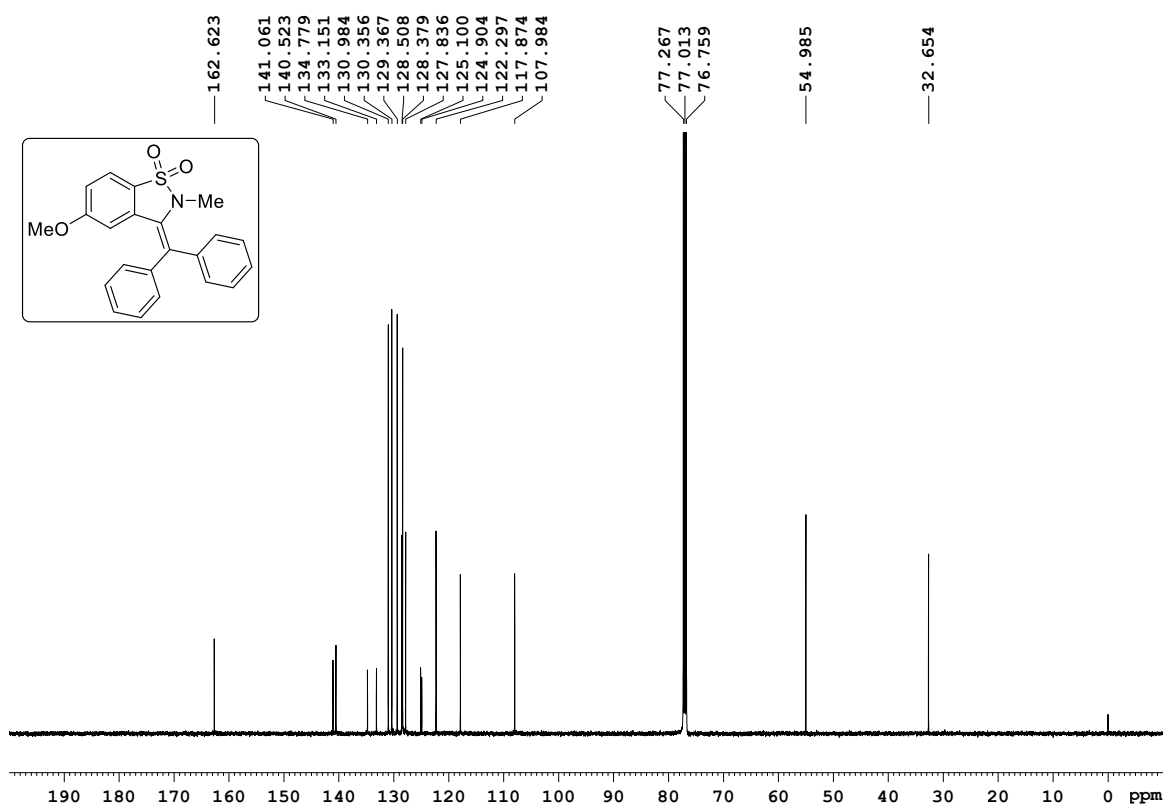

Figure S16.  $^{13}\text{C}$  NMR spectrum of compound 3fa

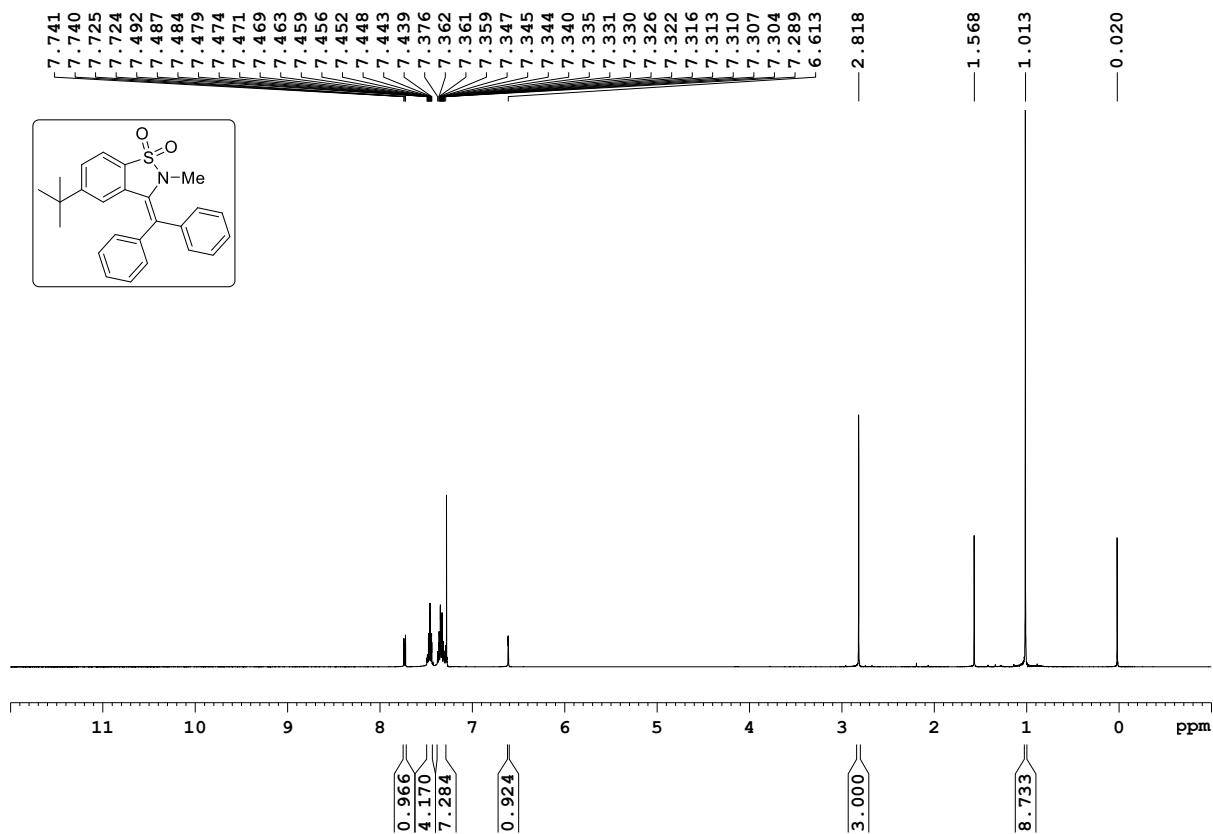

Figure S17. <sup>1</sup>H NMR spectrum of compound 3ga

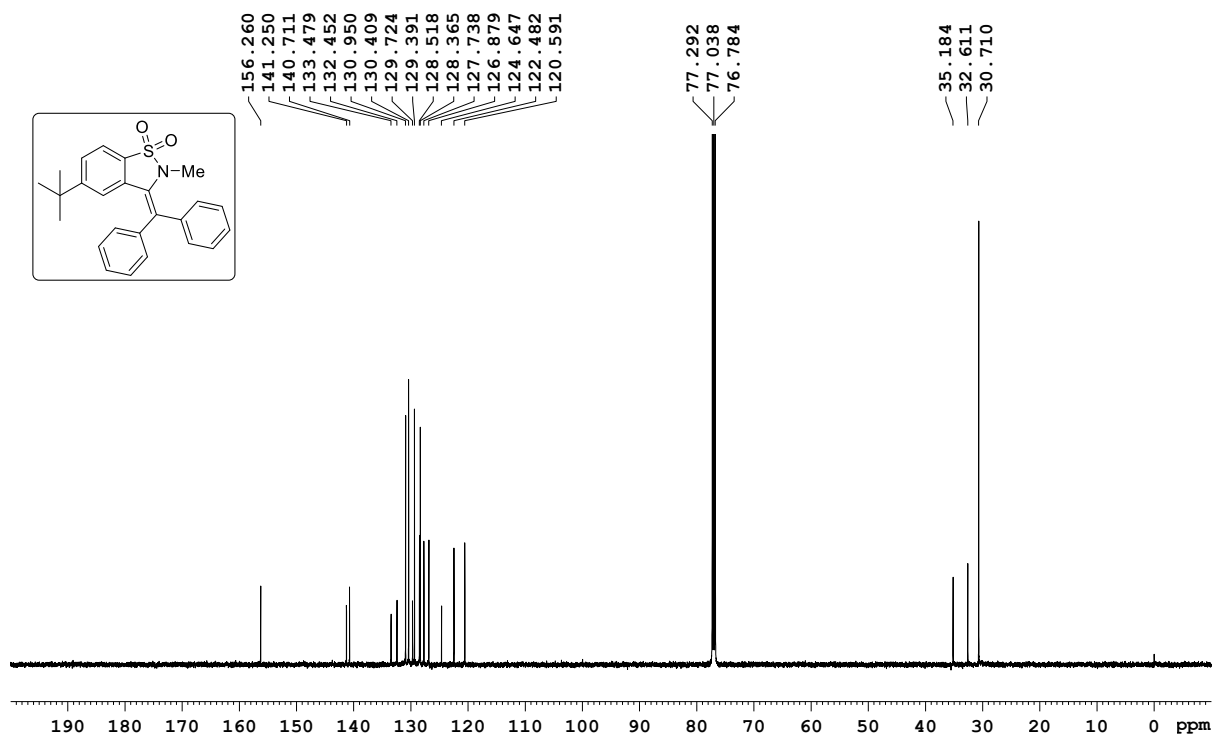

Figure S18. <sup>13</sup>C NMR spectrum of compound 3ga

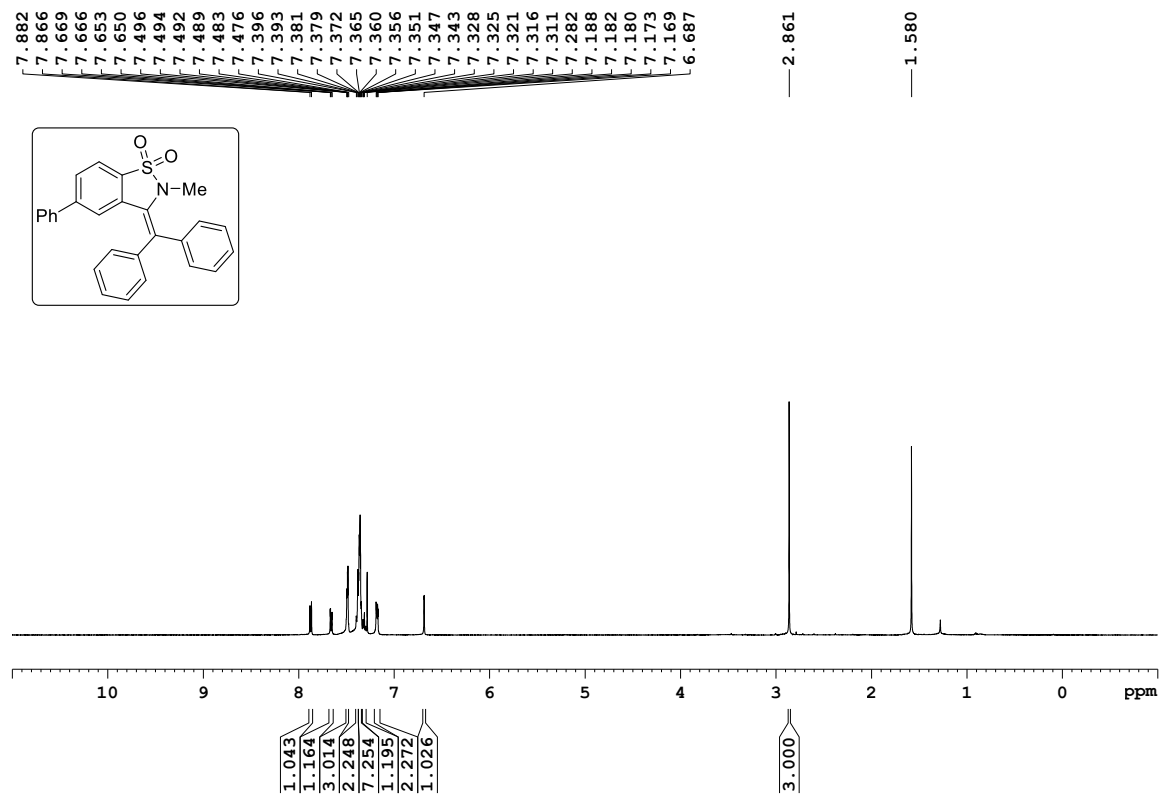

Figure S19.  $^1\text{H}$  NMR spectrum of compound 3ha

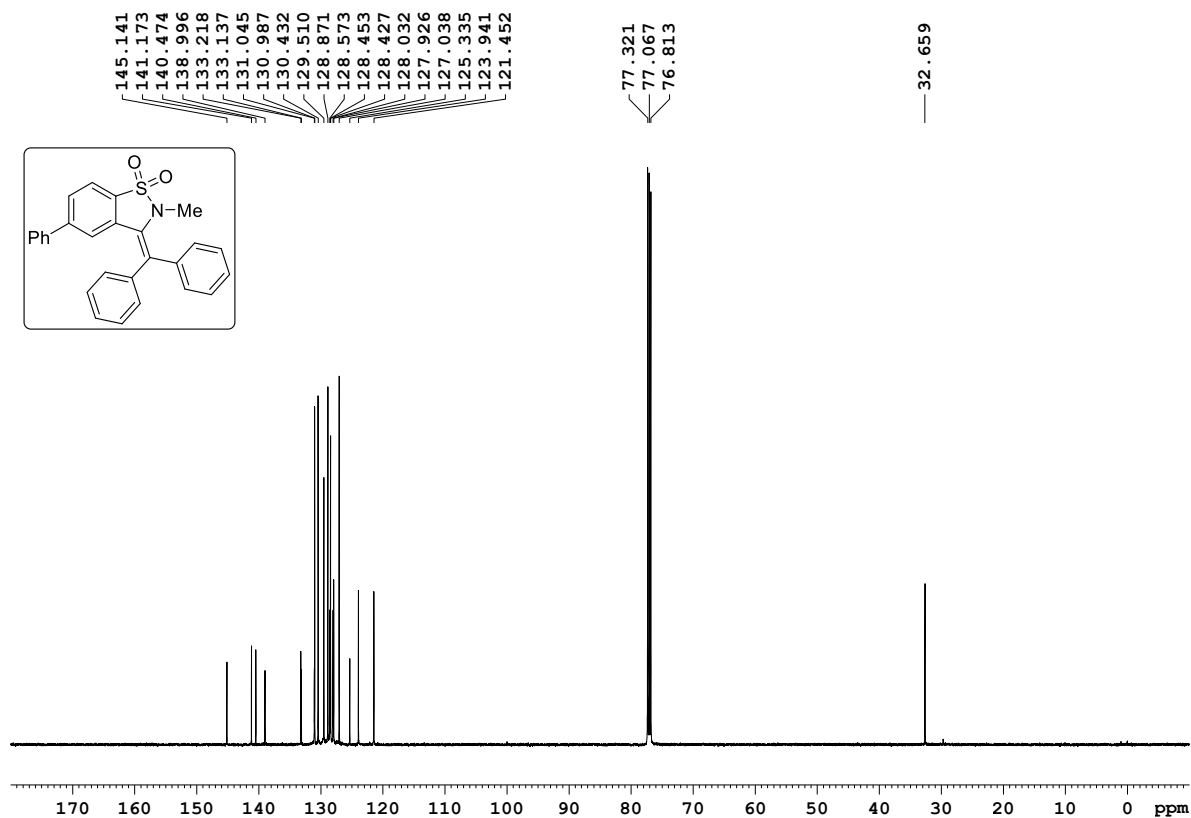

Figure S20.  $^{13}\text{C}$  NMR spectrum of compound 3ha

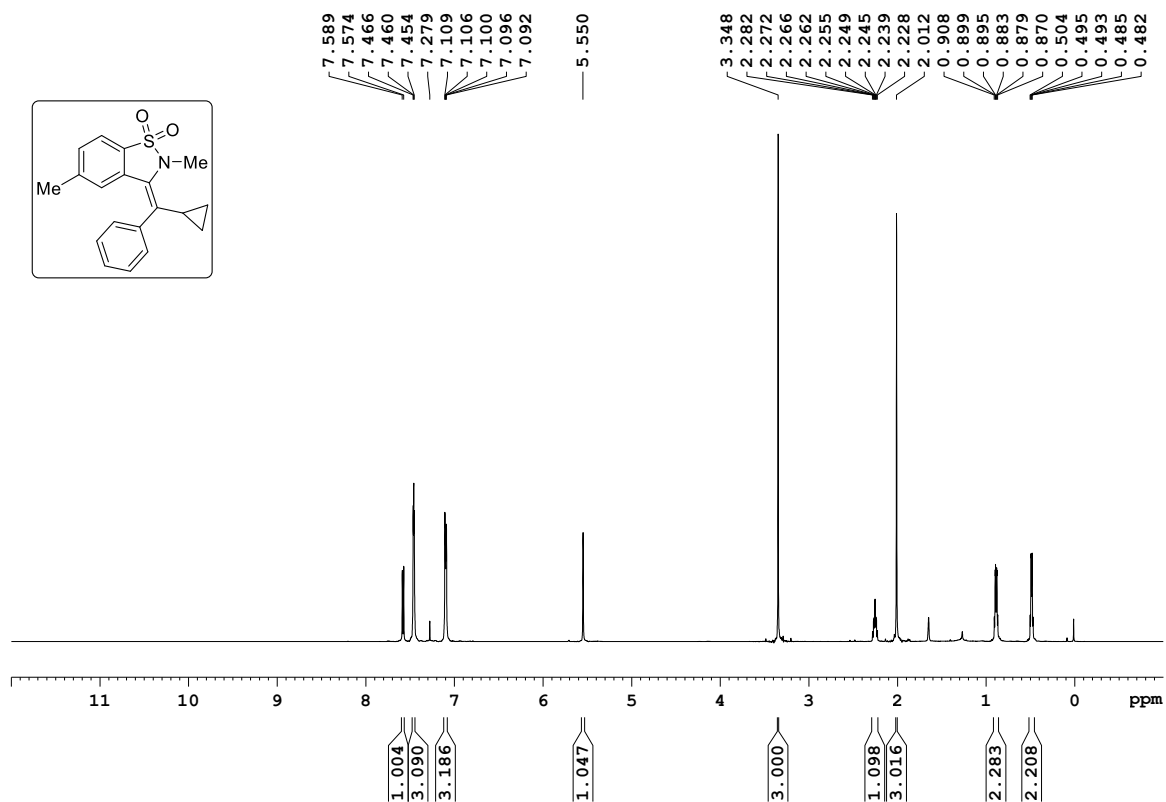

Figure S21. <sup>1</sup>H NMR spectrum of compound **3ia**

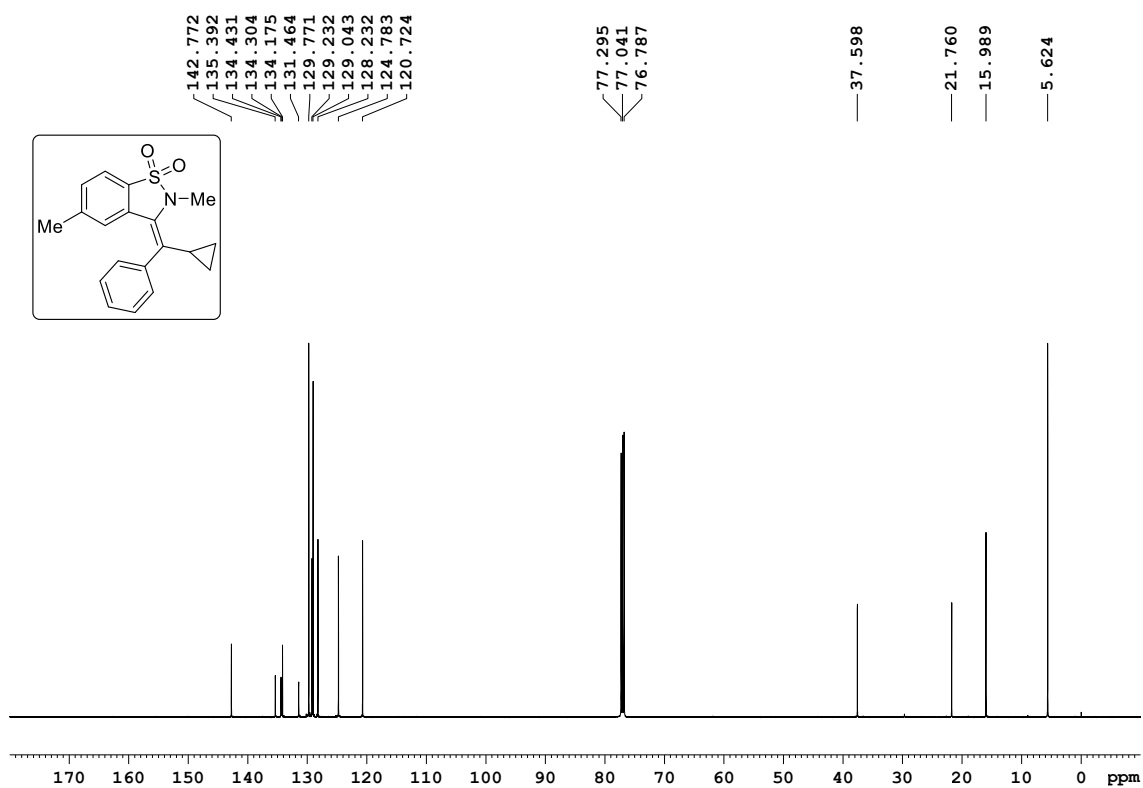

Figure S22. <sup>13</sup>C NMR spectrum of compound **3ia**

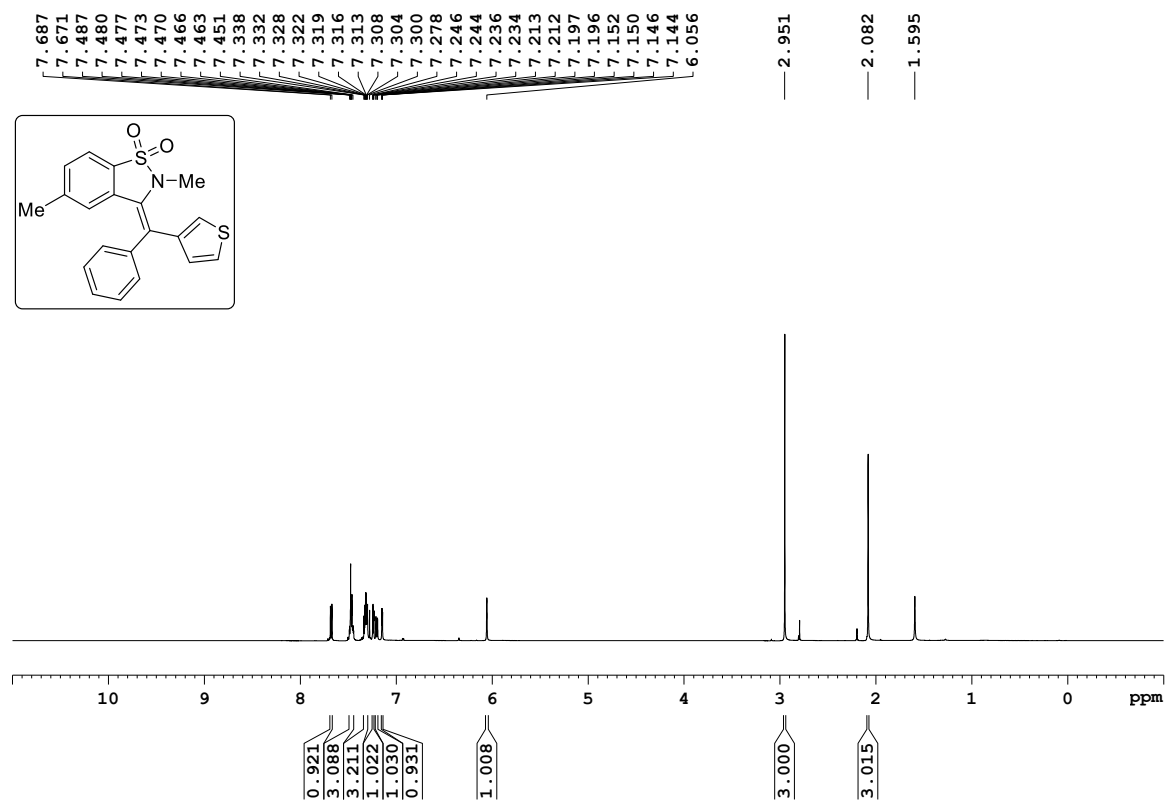

**Figure S23.**  $^1\text{H}$  NMR spectrum of compound **3ja** (purity >96%)

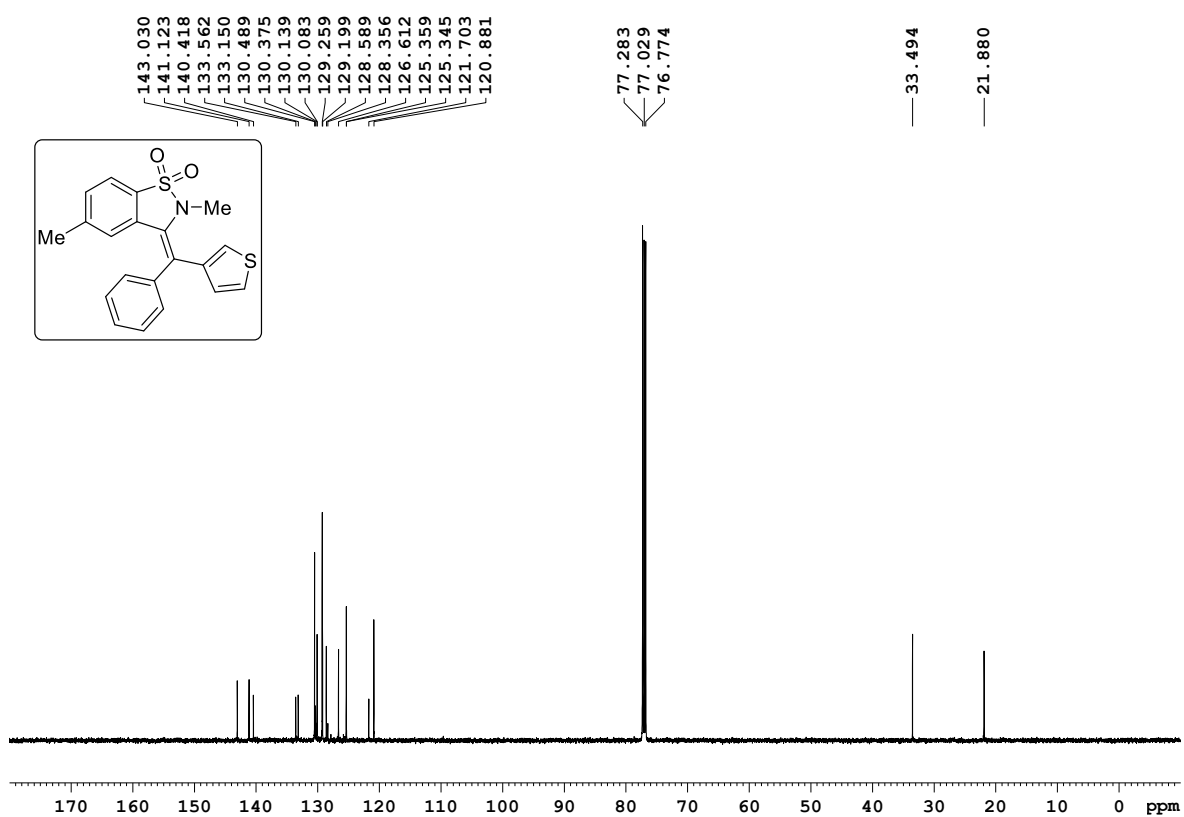

**Figure S24.**  $^{13}\text{C}$  NMR spectrum of compound **3ja** (purity >96%)

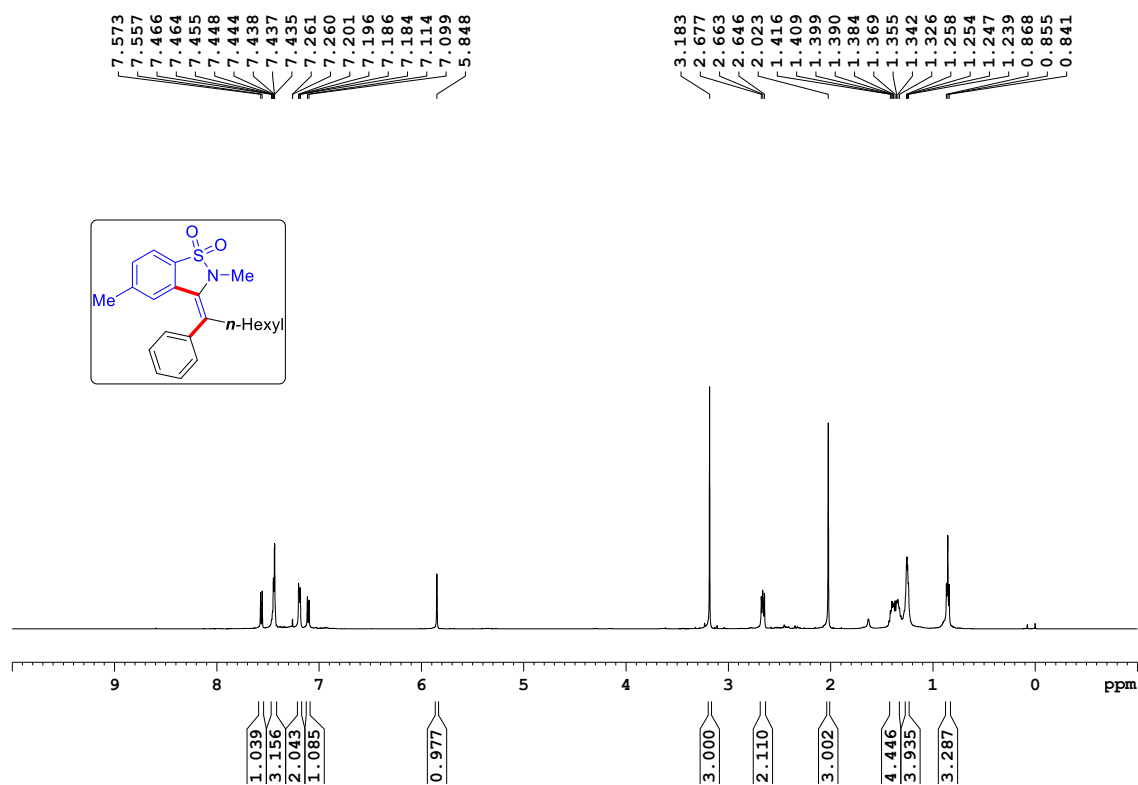

Figure S25. <sup>1</sup>H NMR spectrum of compound 3ka

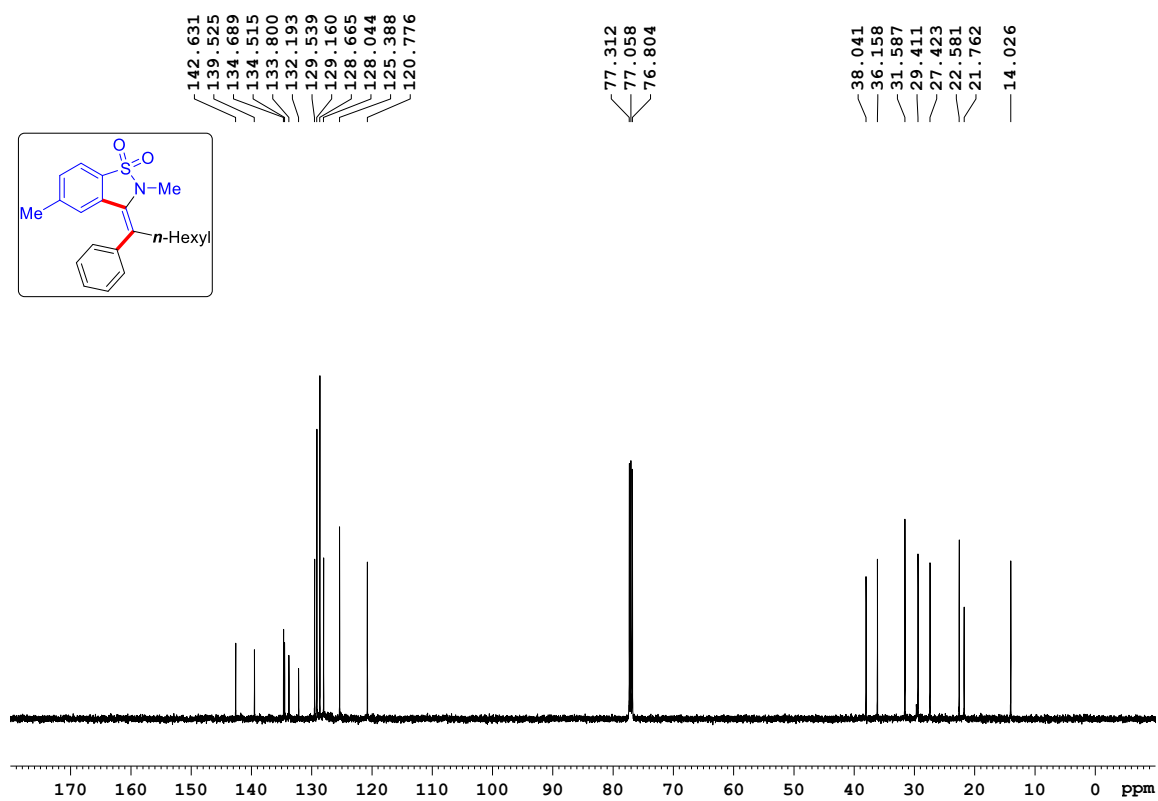

Figure S26. <sup>13</sup>C NMR spectrum of compound 3ka

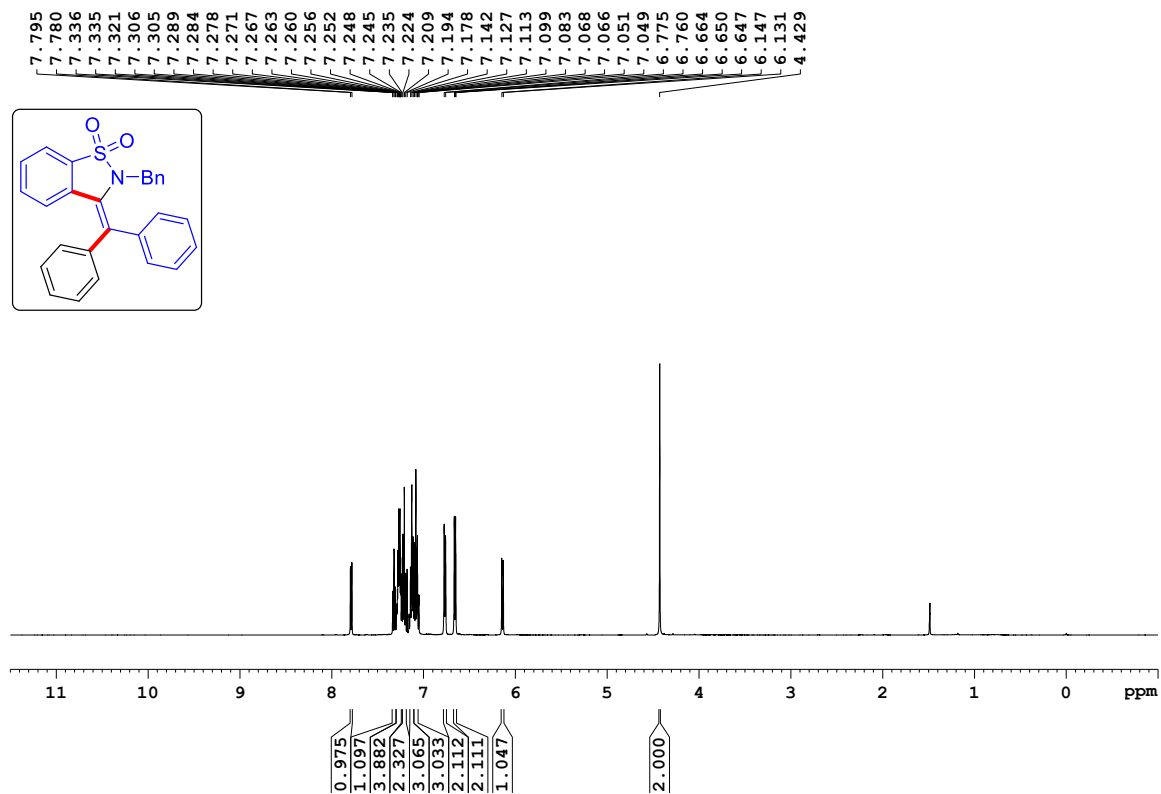

Figure S27. <sup>1</sup>H NMR spectrum of compound 3ma

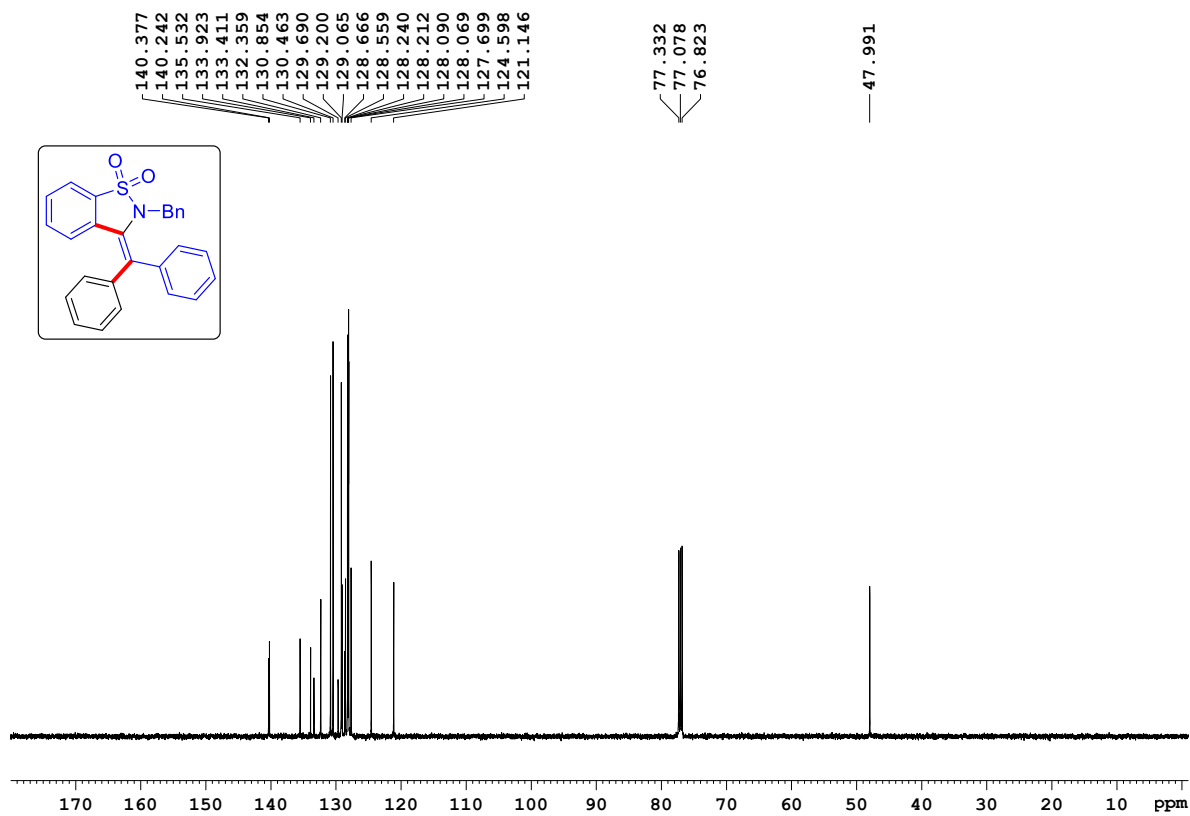

Figure S28. <sup>13</sup>C NMR spectrum of compound 3ma



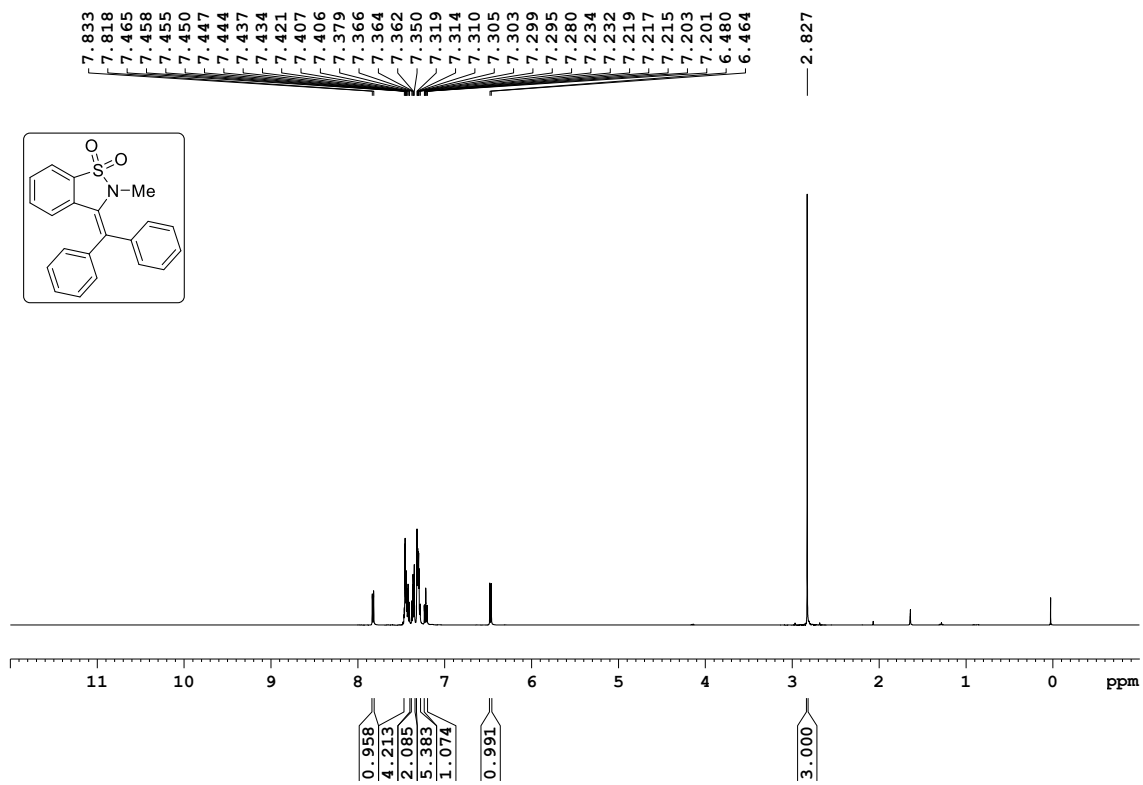

Figure S29. <sup>1</sup>H NMR spectrum of compound 3na

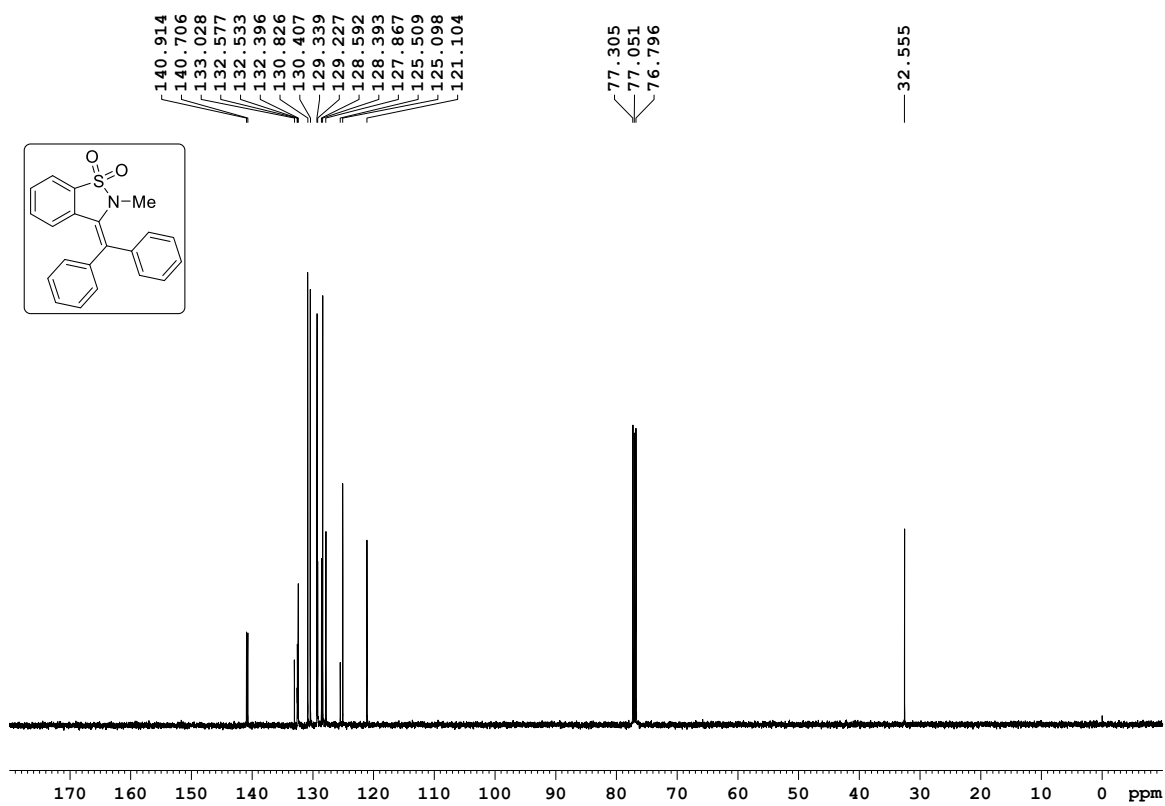

Figure S30. <sup>13</sup>C NMR spectrum of compound 3na

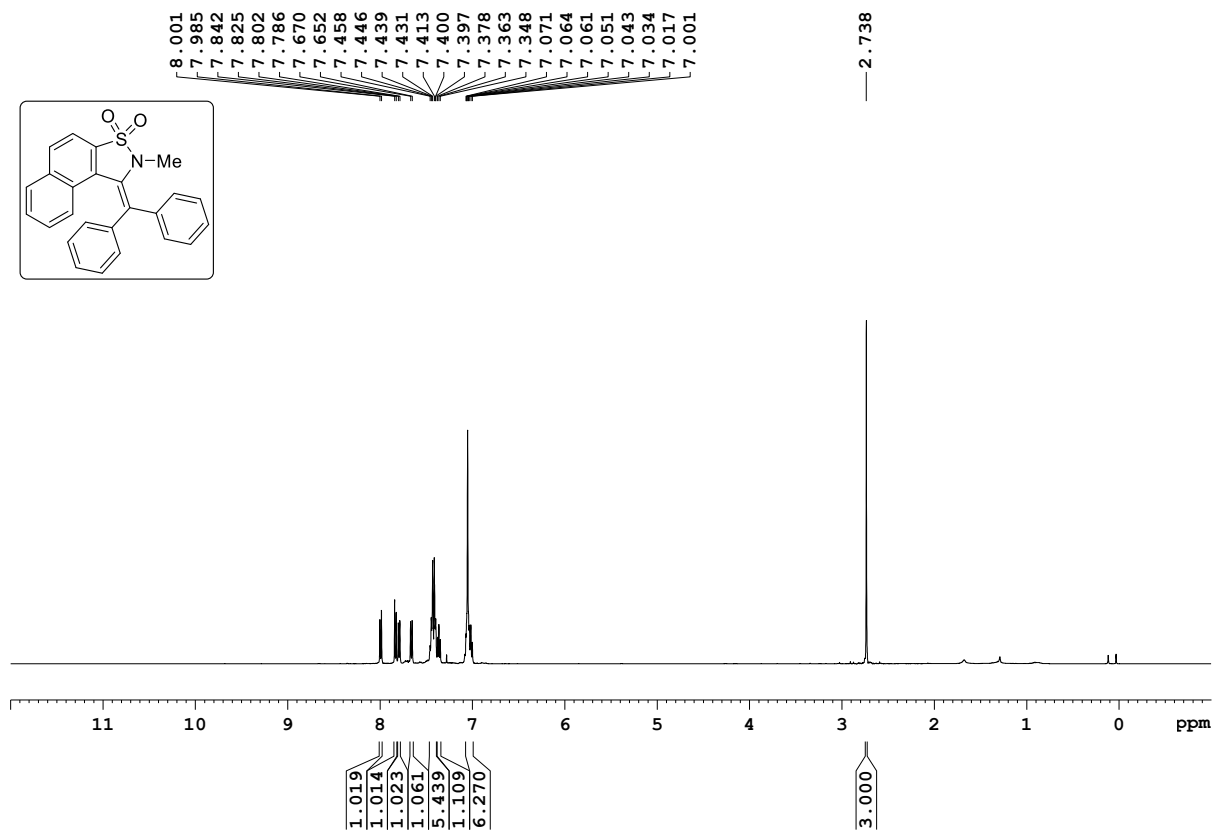

Figure S31. <sup>1</sup>H NMR spectrum of compound 30a

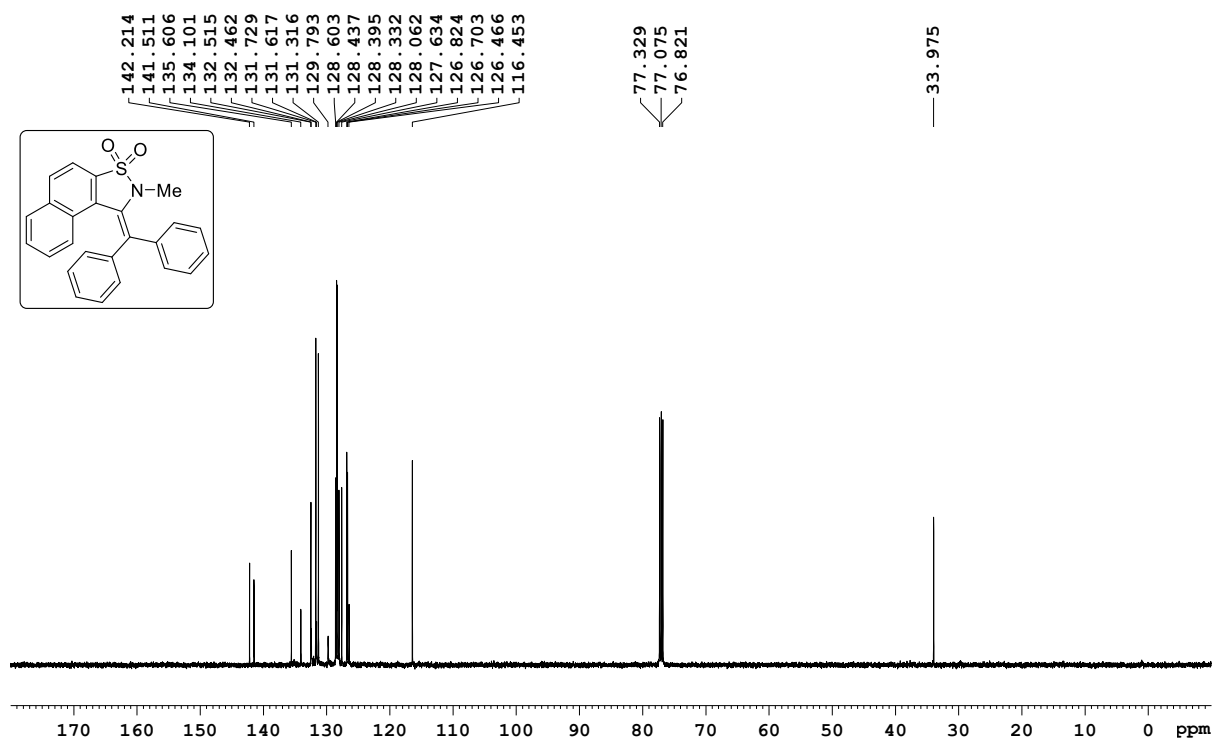

Figure S32. <sup>13</sup>C NMR spectrum of compound 30a

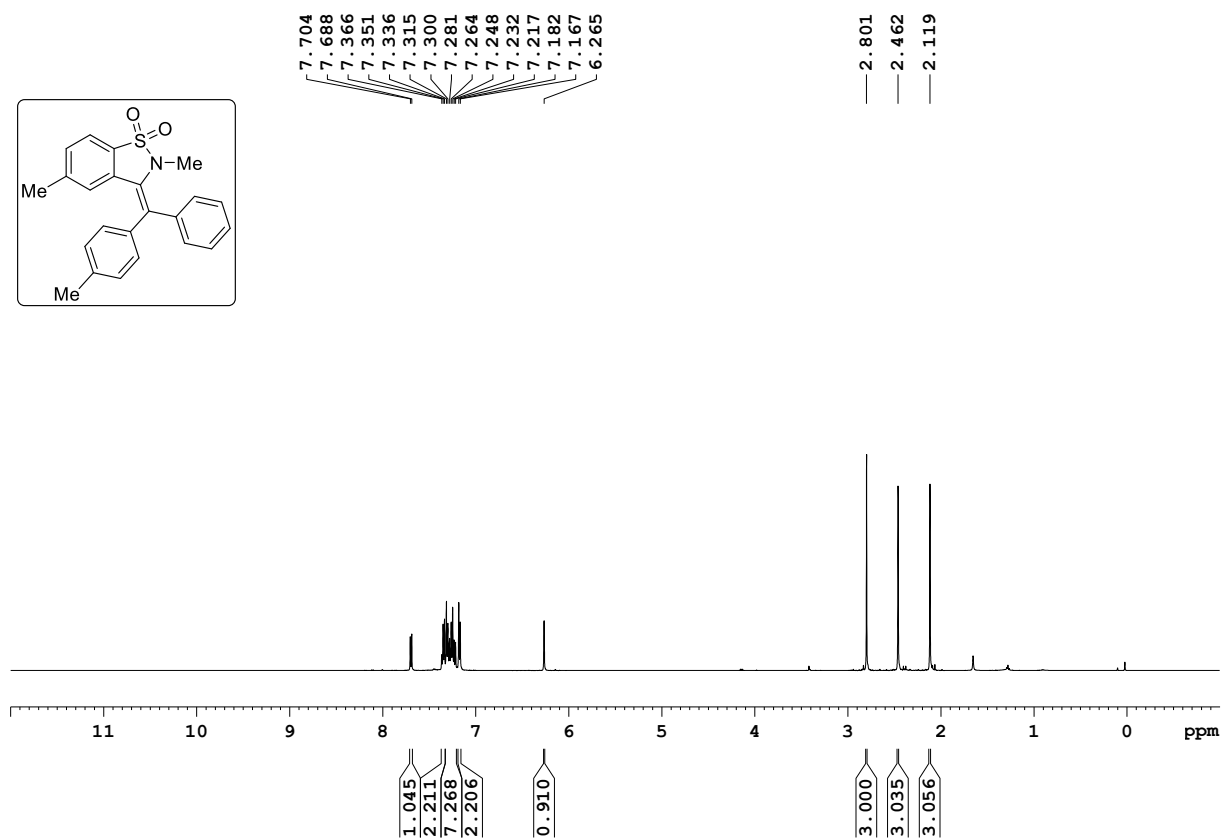

Figure S33.  $^1\text{H}$  NMR spectrum of compound **3ab**

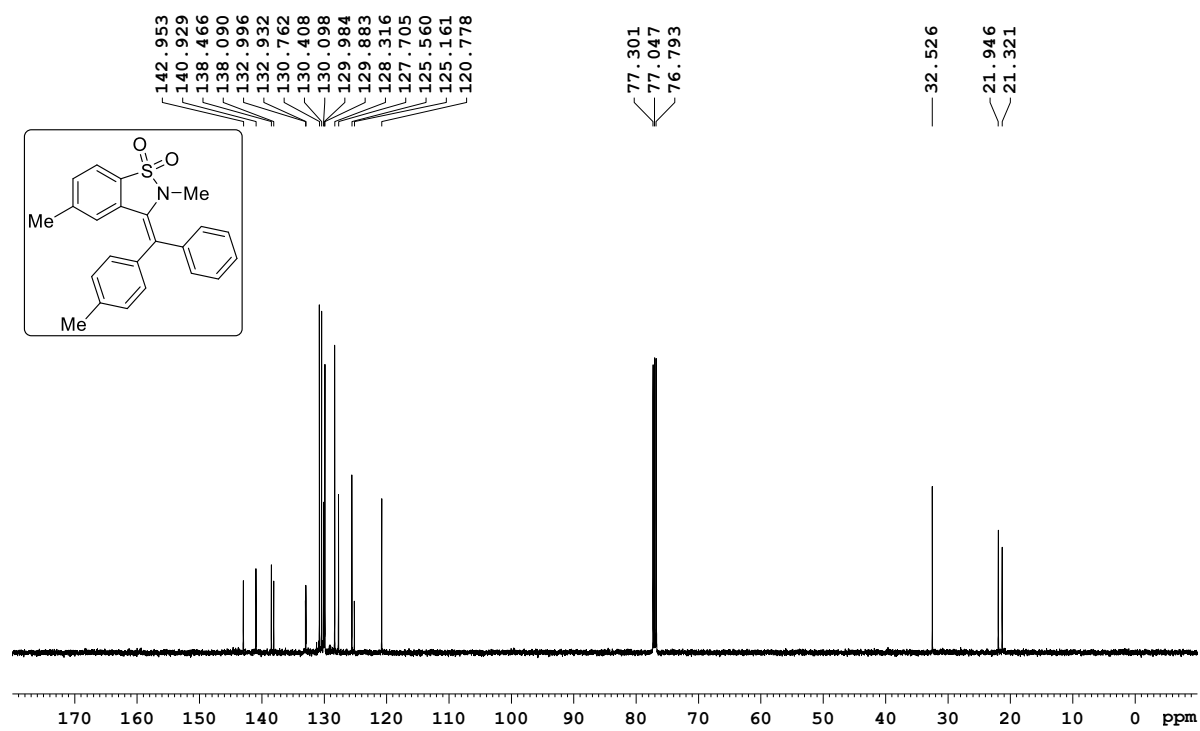

Figure S34.  $^{13}\text{C}$  NMR spectrum of compound **3ab**

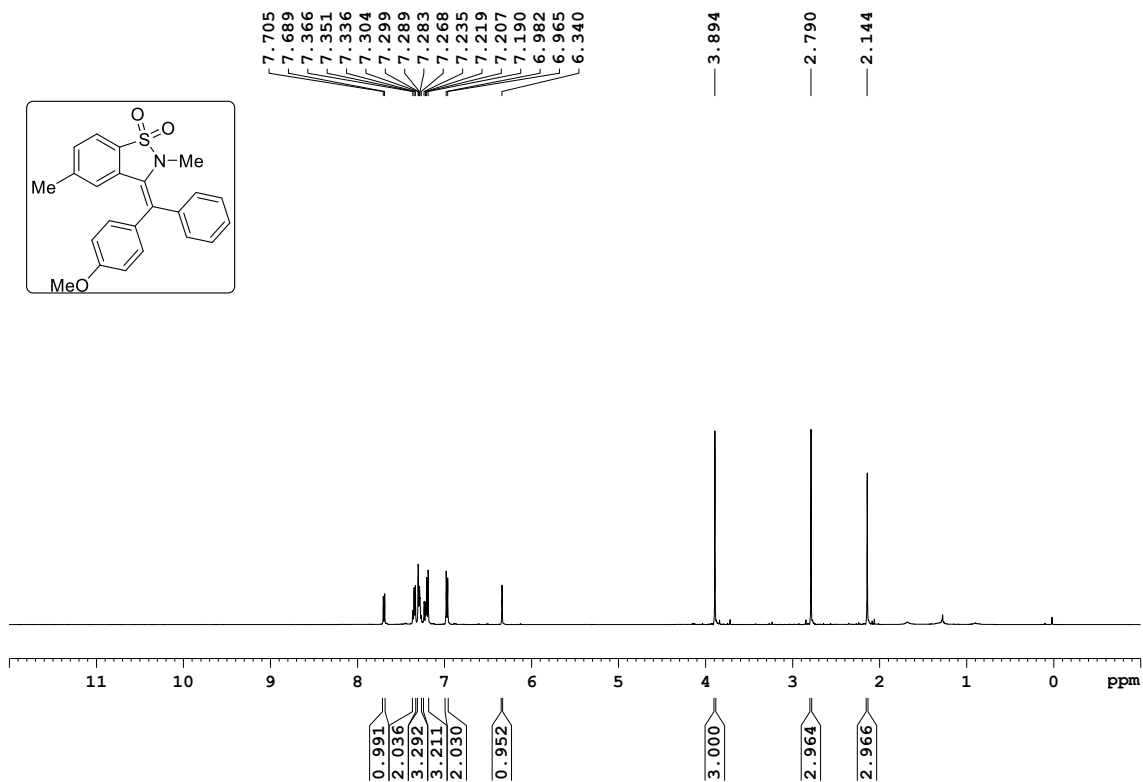

Figure S35. <sup>1</sup>H NMR spectrum of compound 3ac

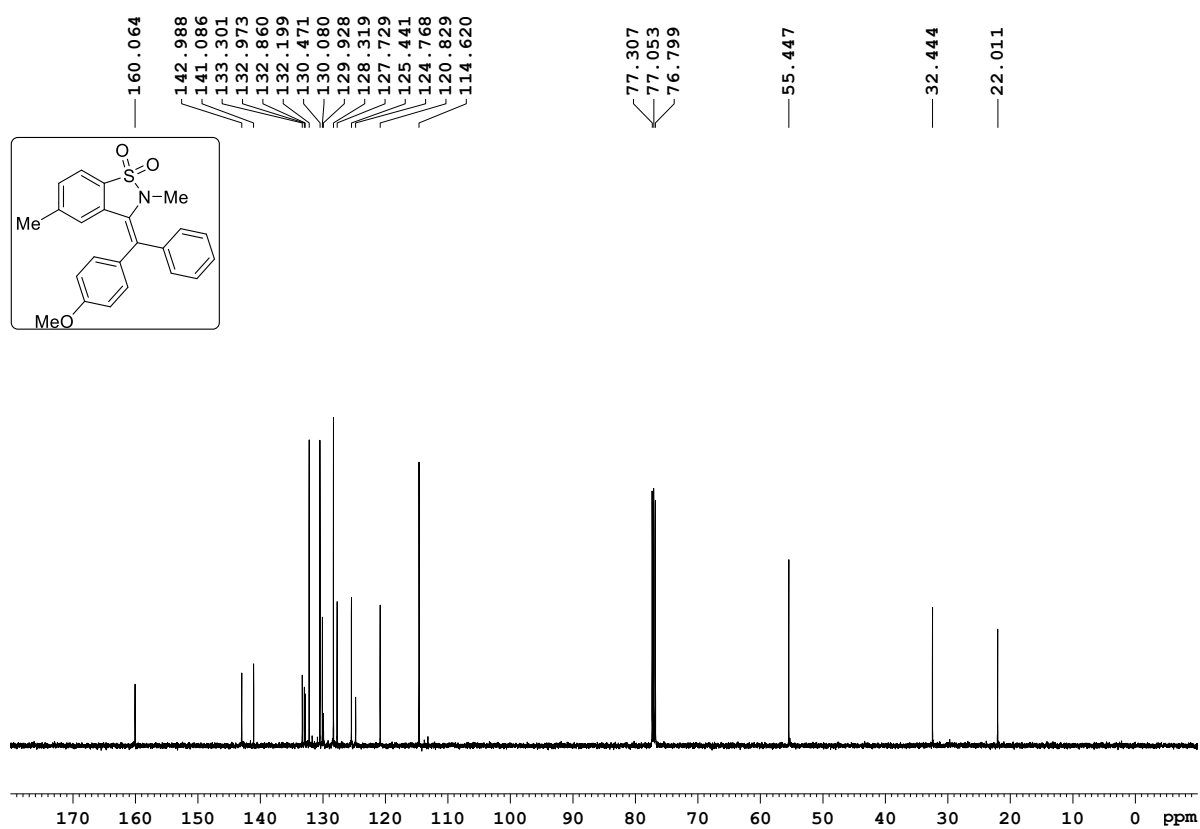

Figure S36. <sup>13</sup>C NMR spectrum of compound 3ac

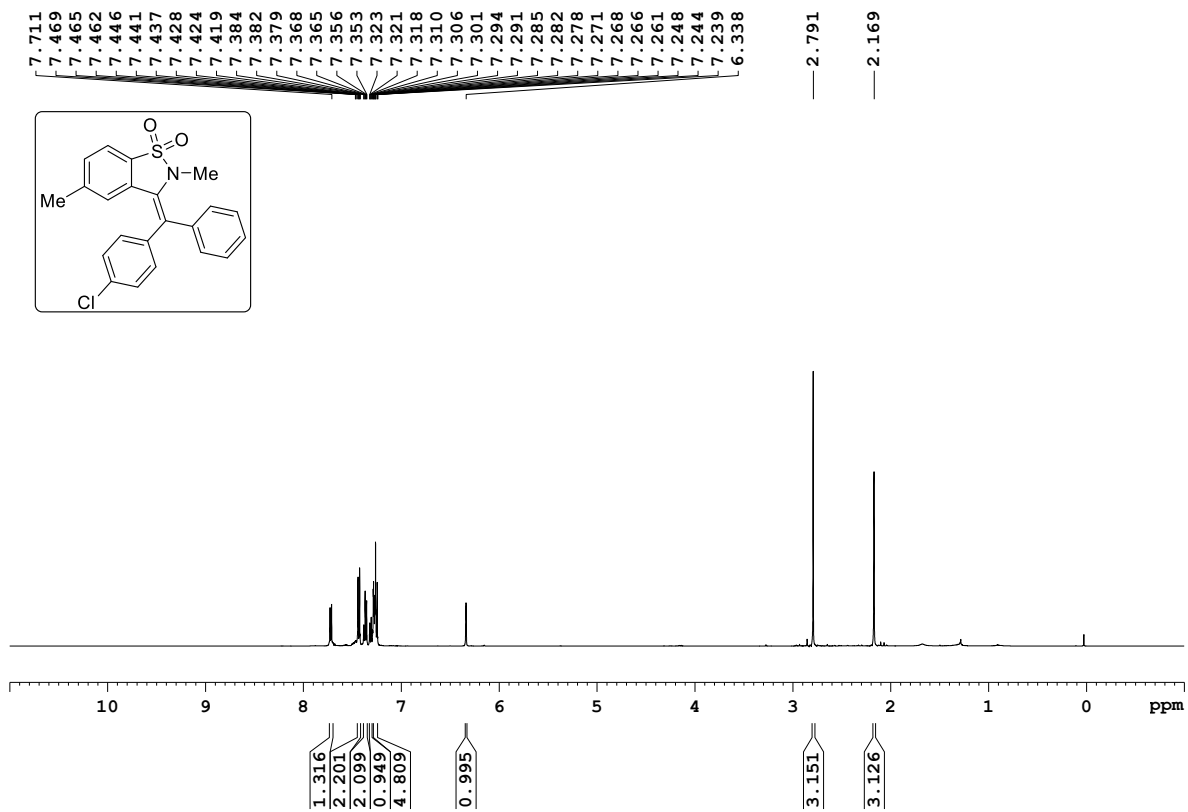

Figure S37. <sup>1</sup>H NMR spectrum of compound 3ad

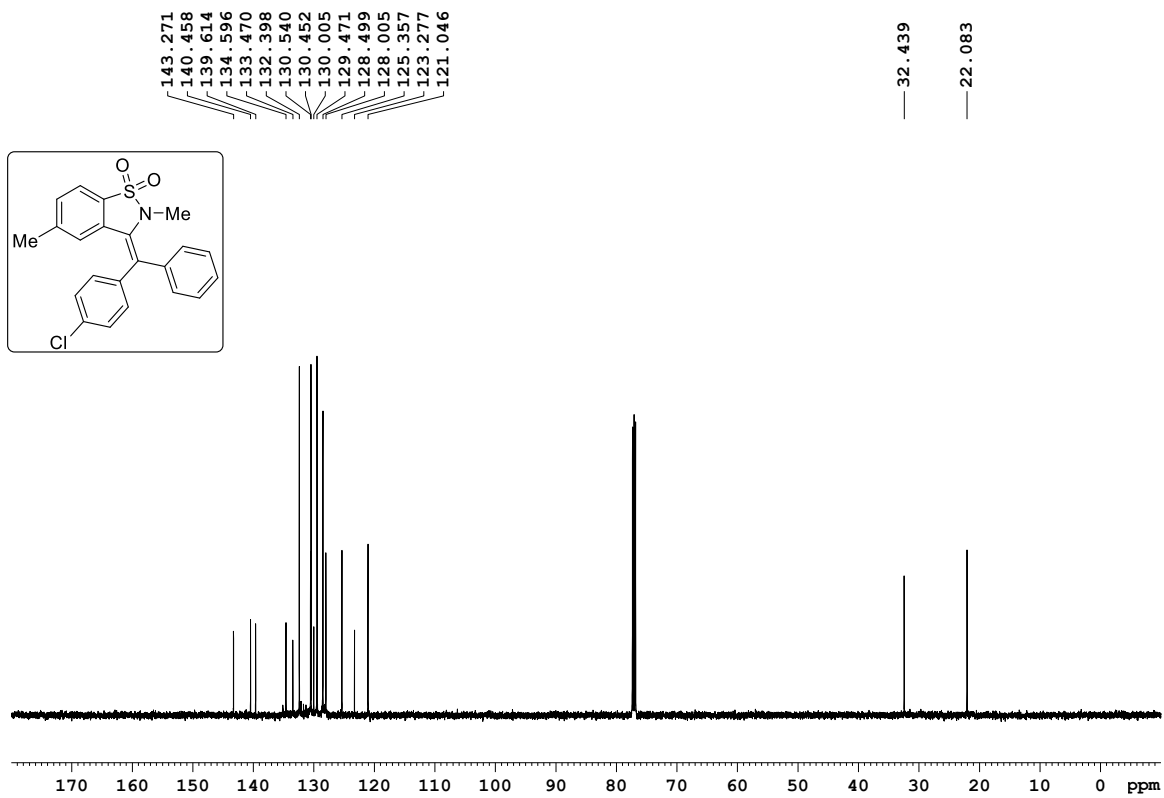

Figure S38. <sup>13</sup>C NMR spectrum of compound 3ad

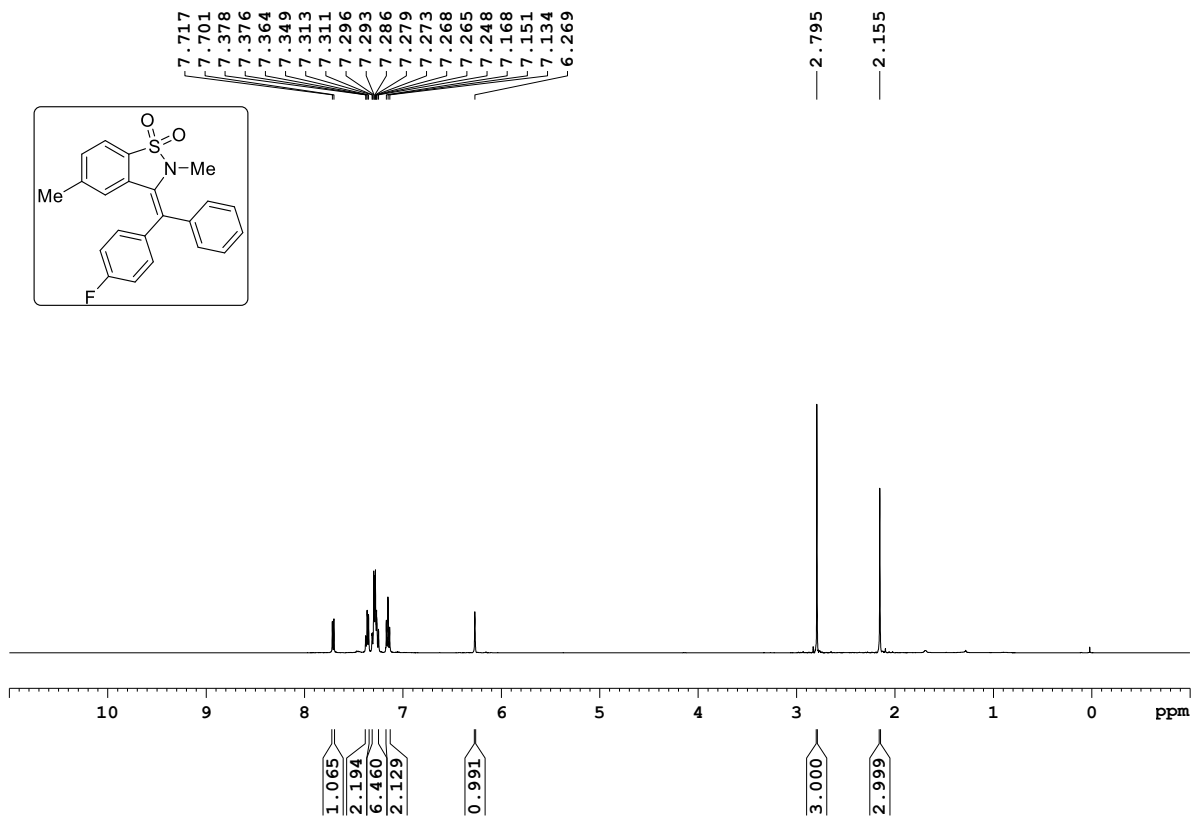

Figure S39.  $^1\text{H NMR}$  spectrum of compound 3ae

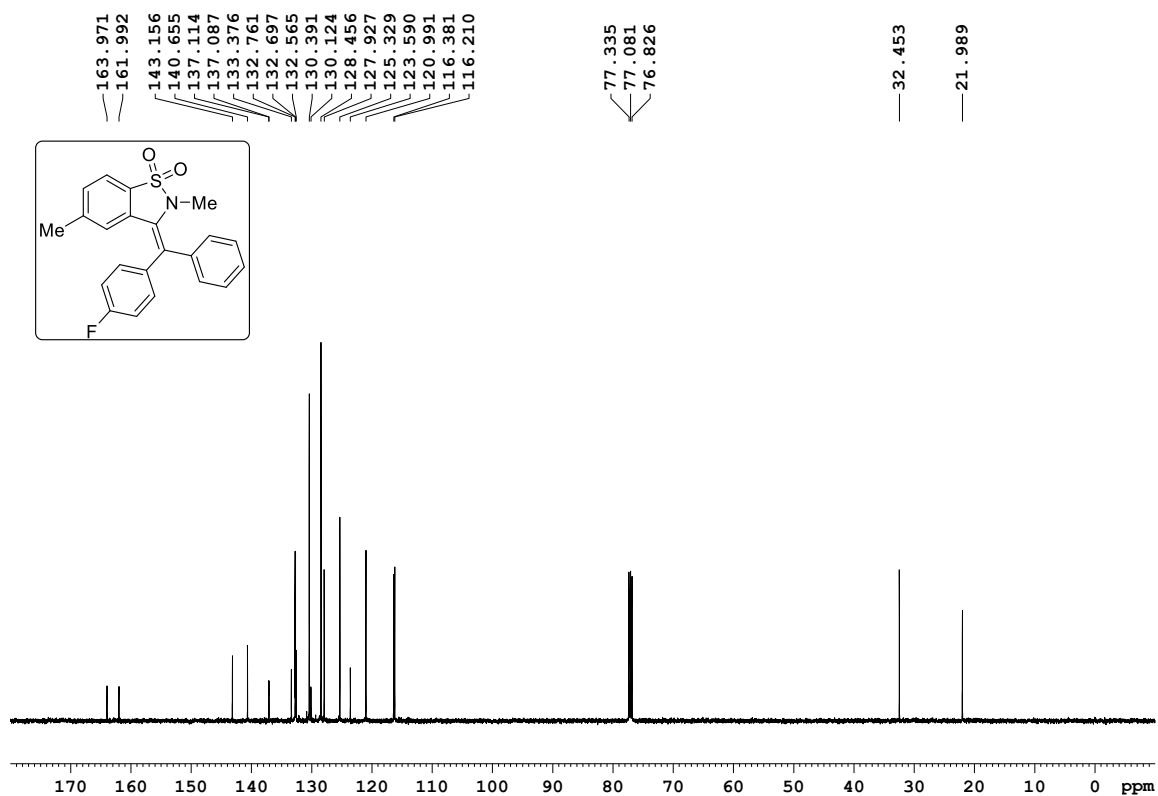

Figure S40.  $^{13}\text{C NMR}$  spectrum of compound 3ae

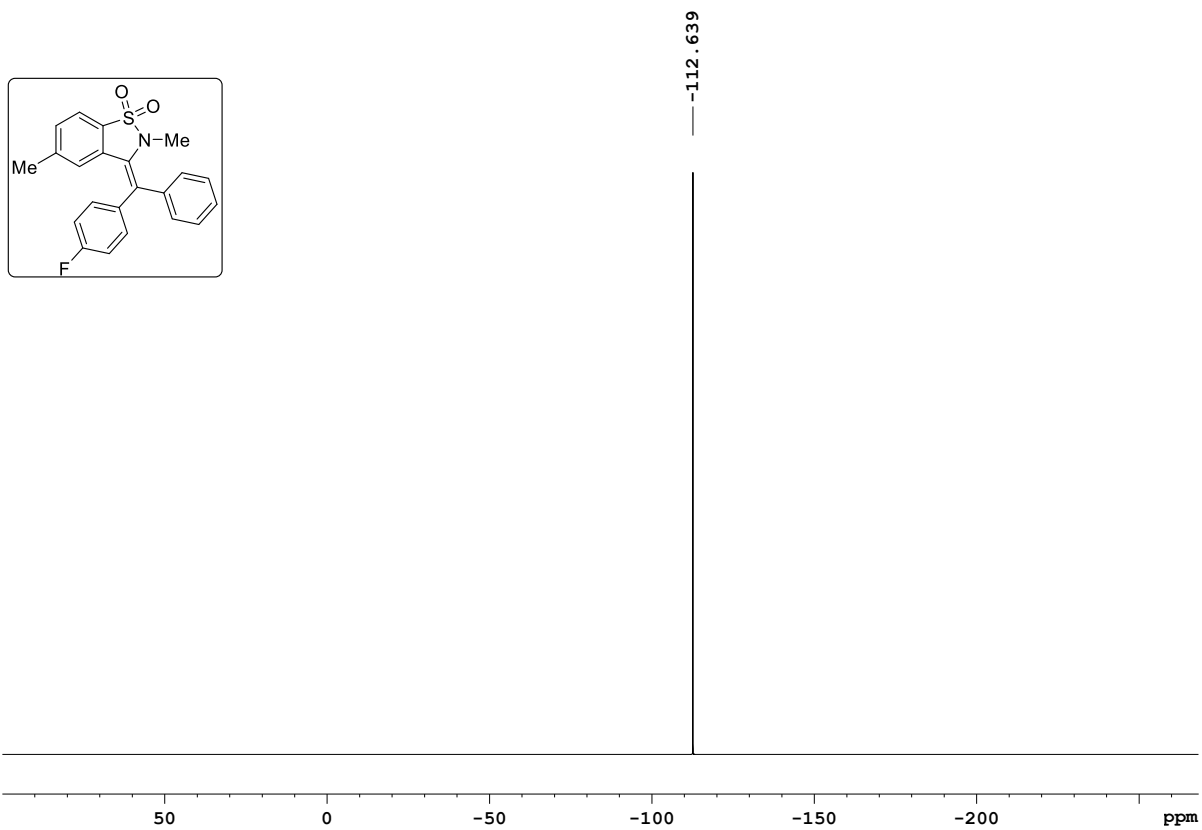

**Figure S41.**  $^{19}\text{F}$  NMR spectrum of compound **3ae**

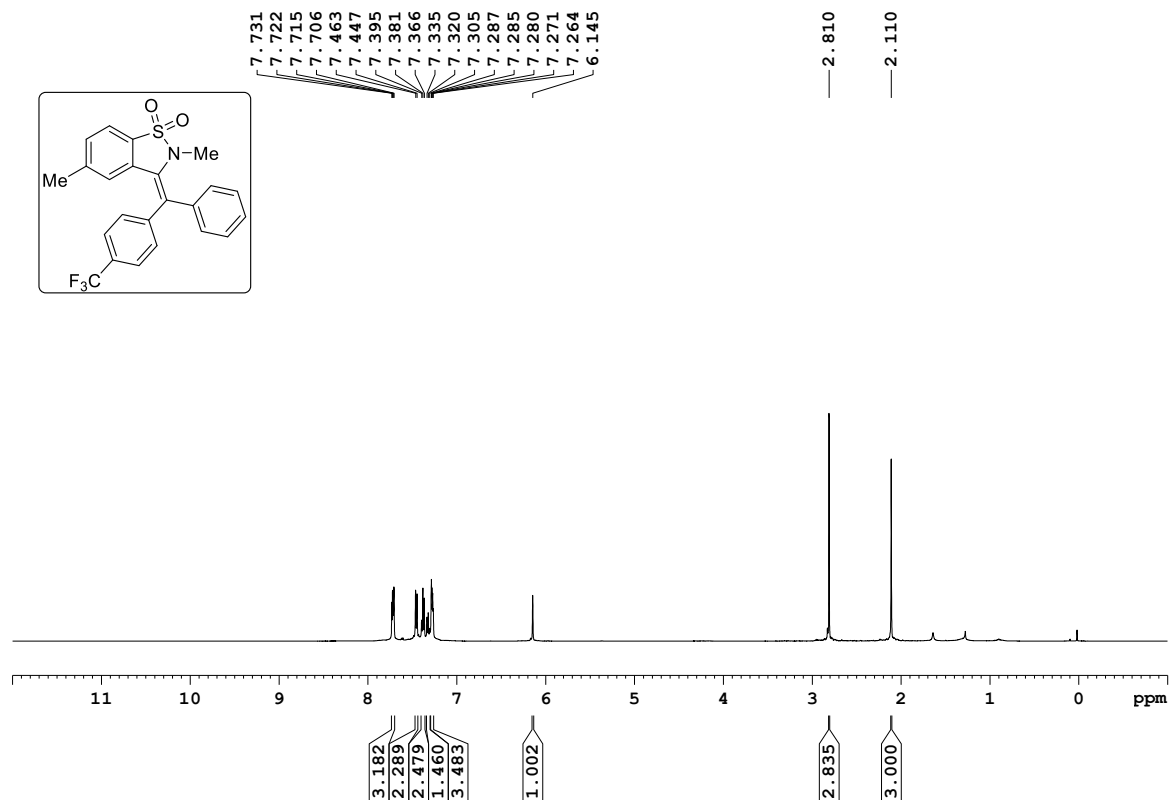

Figure S42. <sup>1</sup>H NMR spectrum of compound 3af

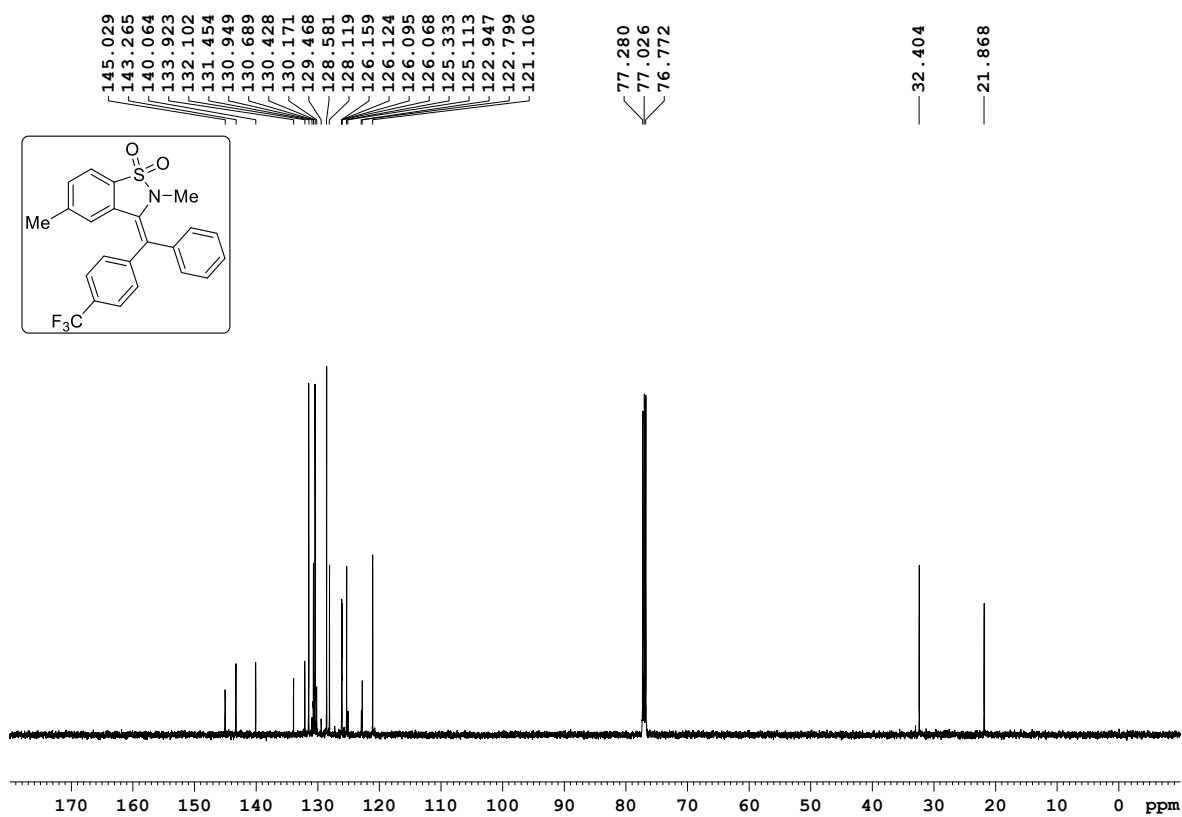

Figure S43. <sup>13</sup>C NMR spectrum of compound 3af



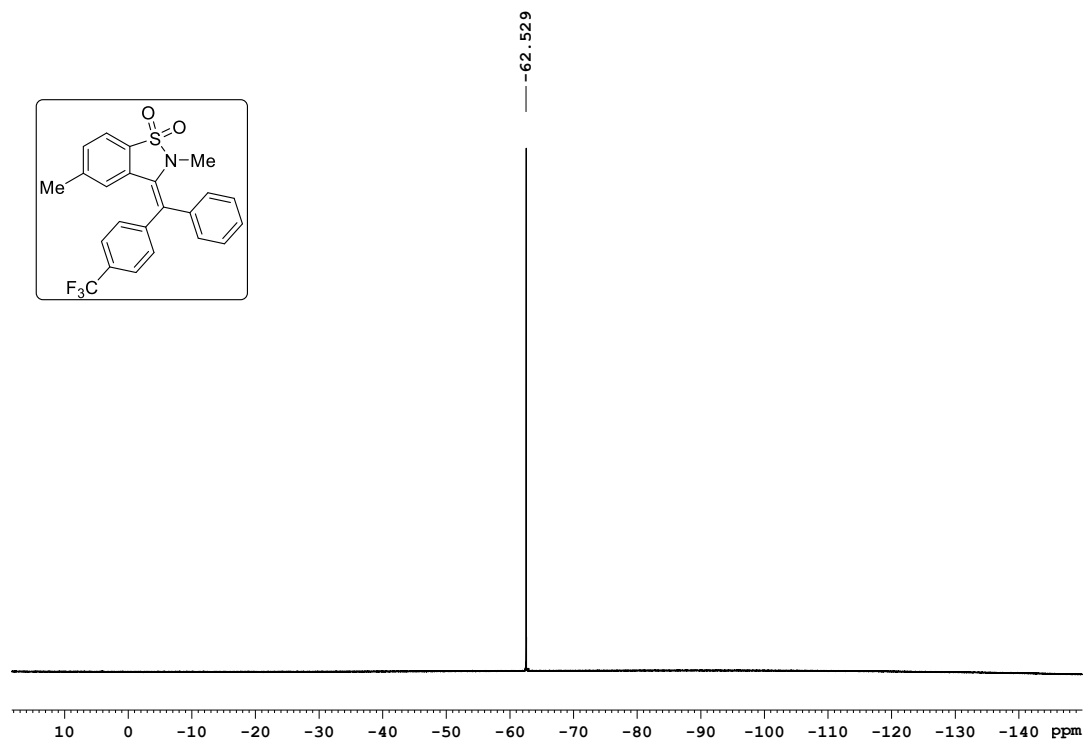

**Figure S44.**  $^{19}\text{F}$  NMR spectrum of compound 3af

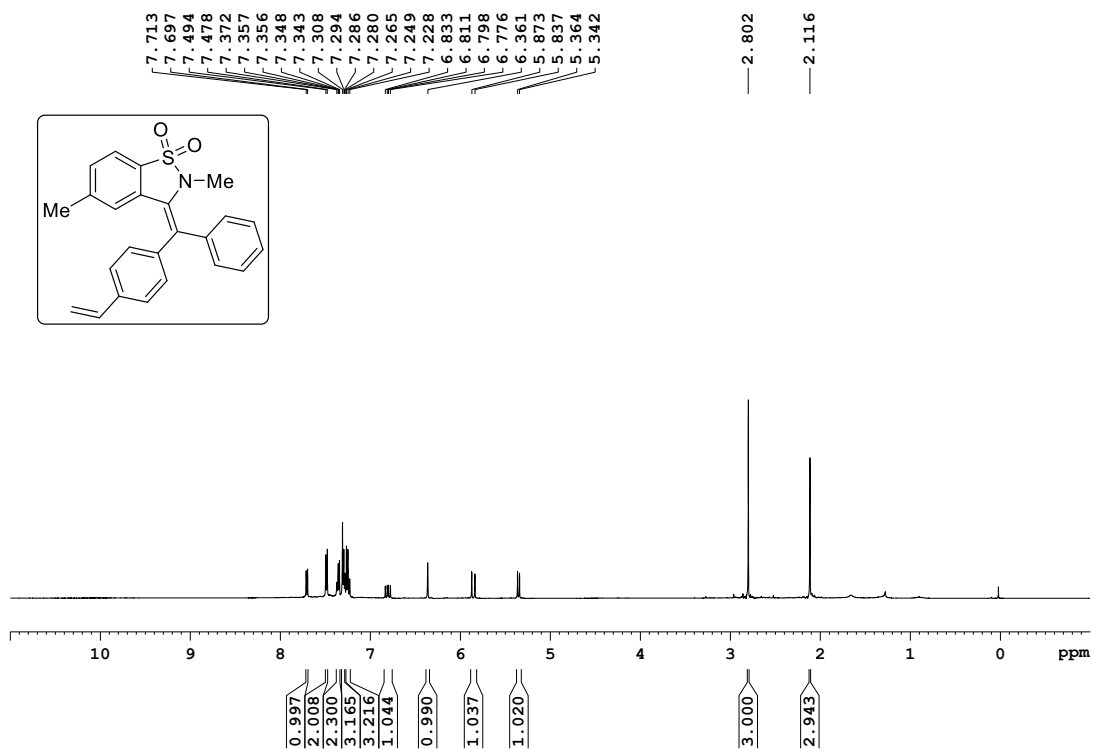

**Figure S45.** <sup>1</sup>H NMR spectrum of compound **3ag** (purity >96%)

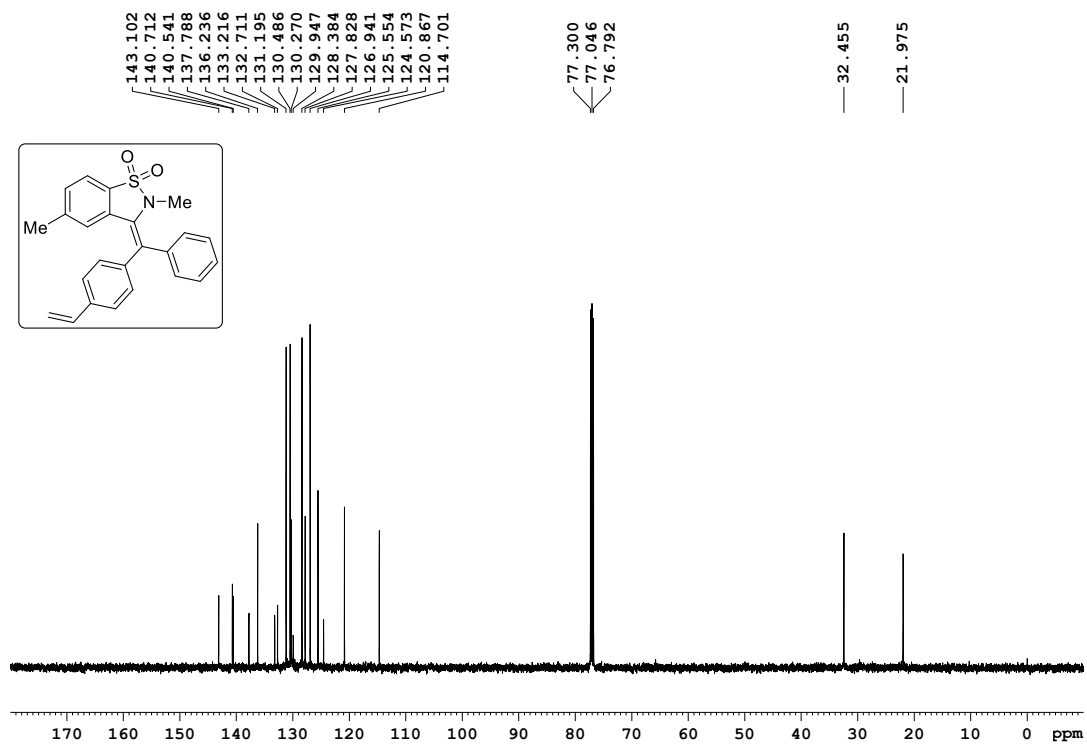

**Figure S46.** <sup>13</sup>C NMR spectrum of compound **3ag** (purity >96%)

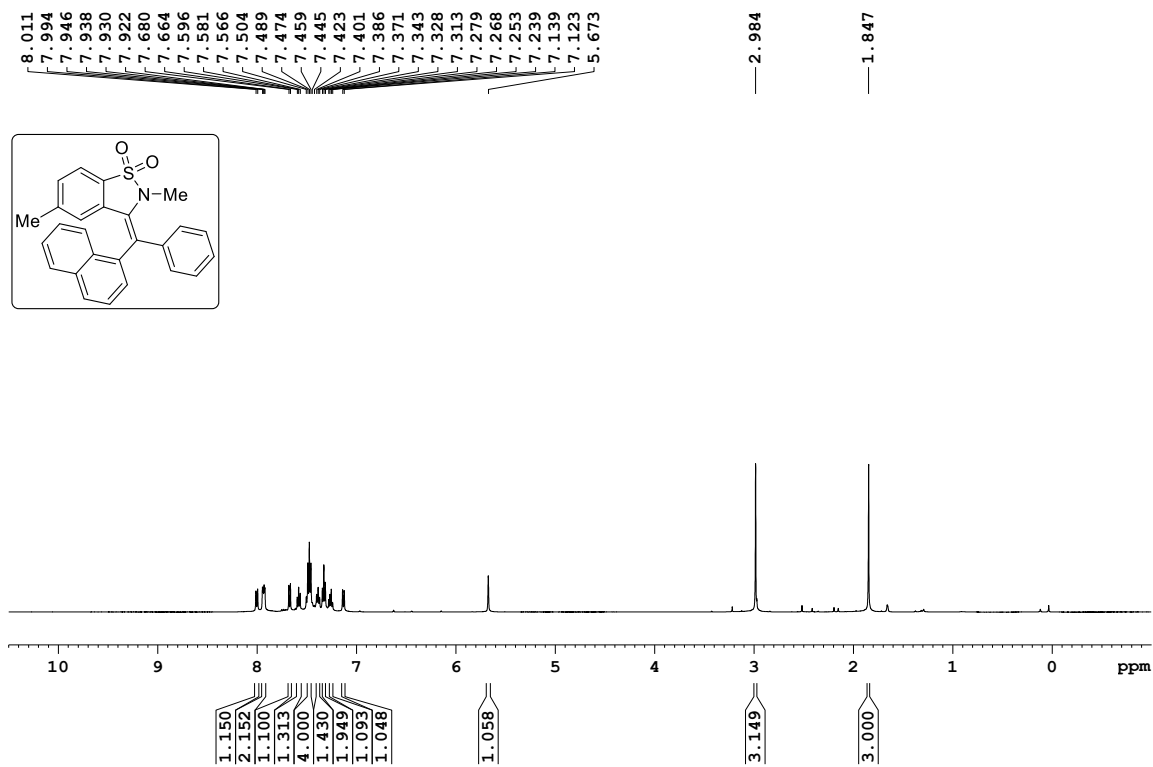

Figure S47. <sup>1</sup>H NMR spectrum of compound **3ah**

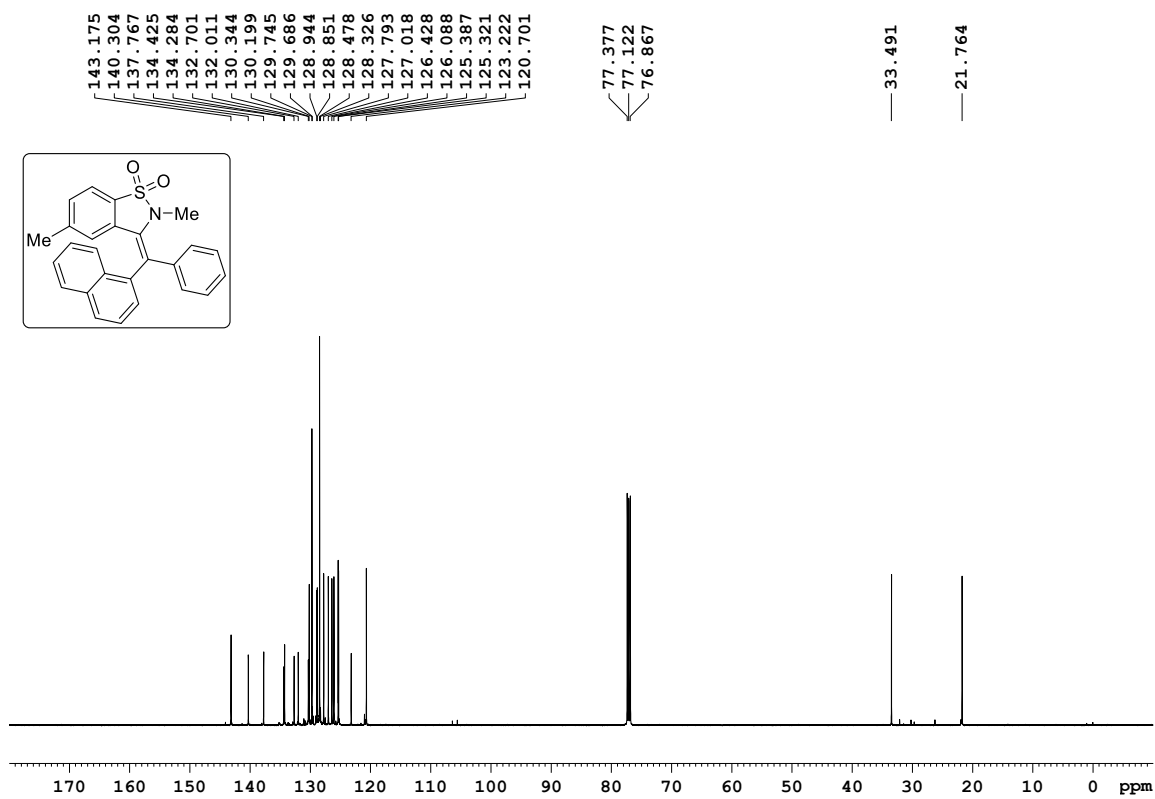

Figure S48. <sup>13</sup>C NMR spectrum of compound **3ah** (purity ca 96%)

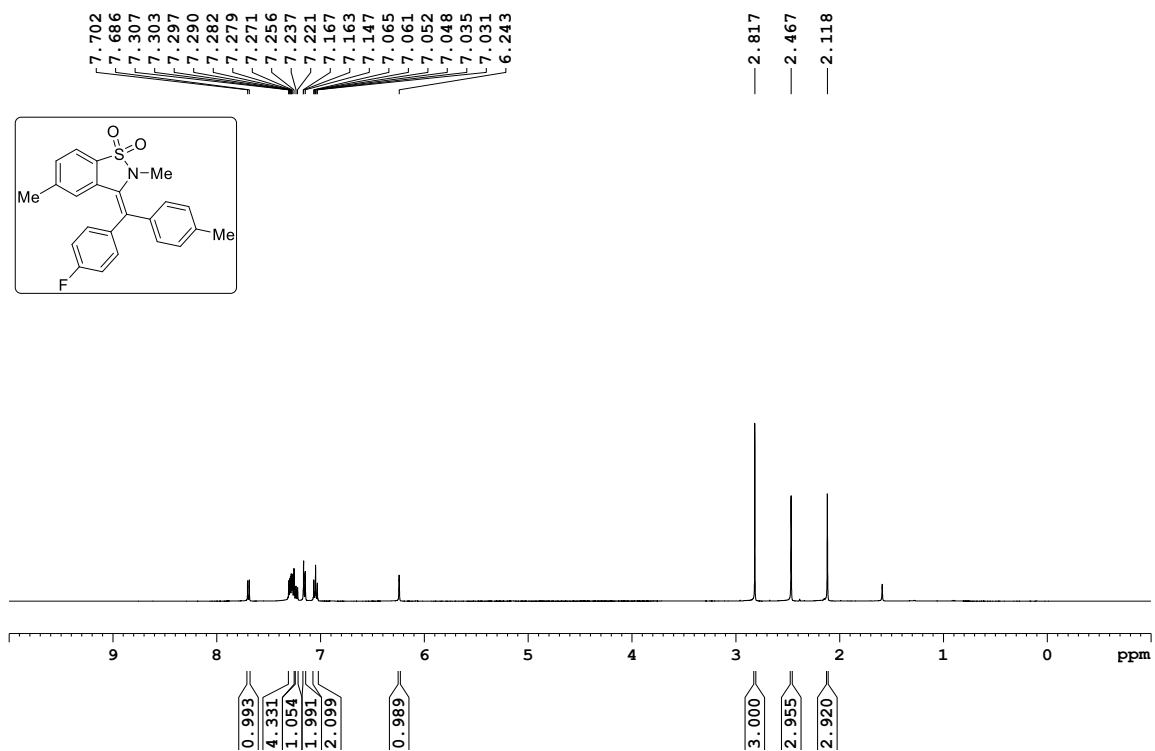

**Figure S49.** <sup>1</sup>H NMR spectrum of compound **3be**

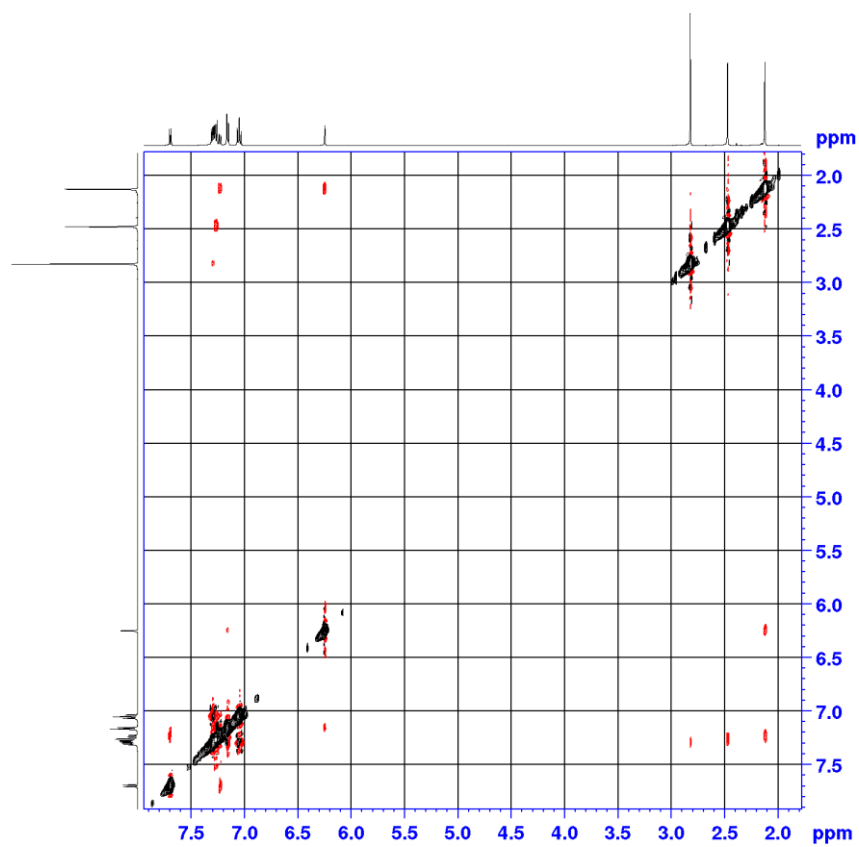

**Figure S50.** NOESY spectrum of compound **3be**

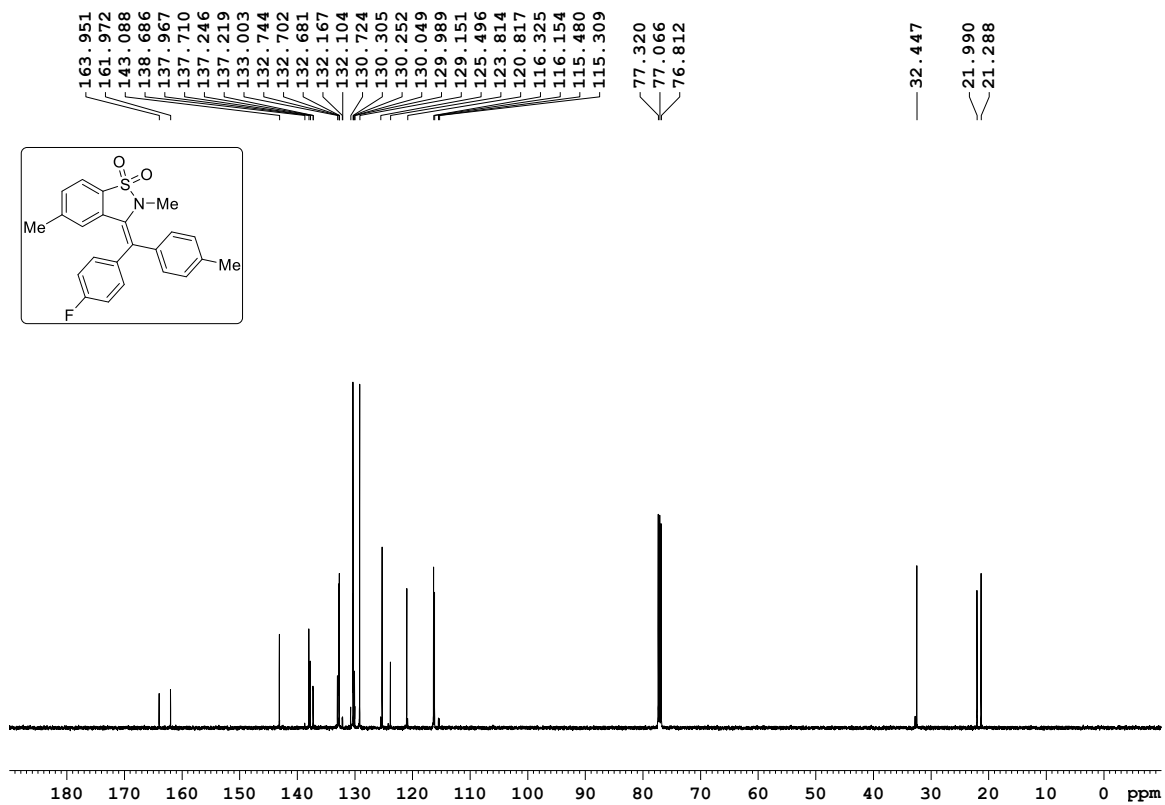

Figure S51. <sup>13</sup>C NMR spectrum of compound 3be

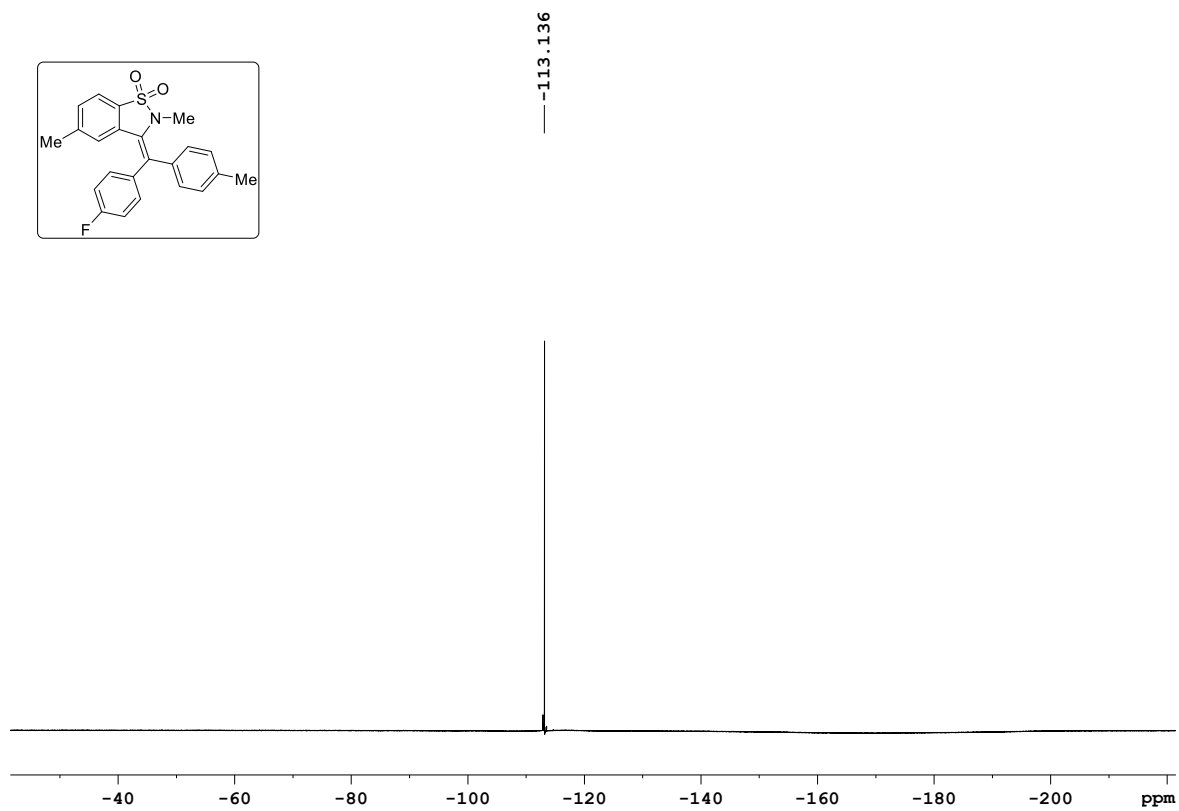

Figure S52. <sup>19</sup>F NMR spectrum of compound 3be

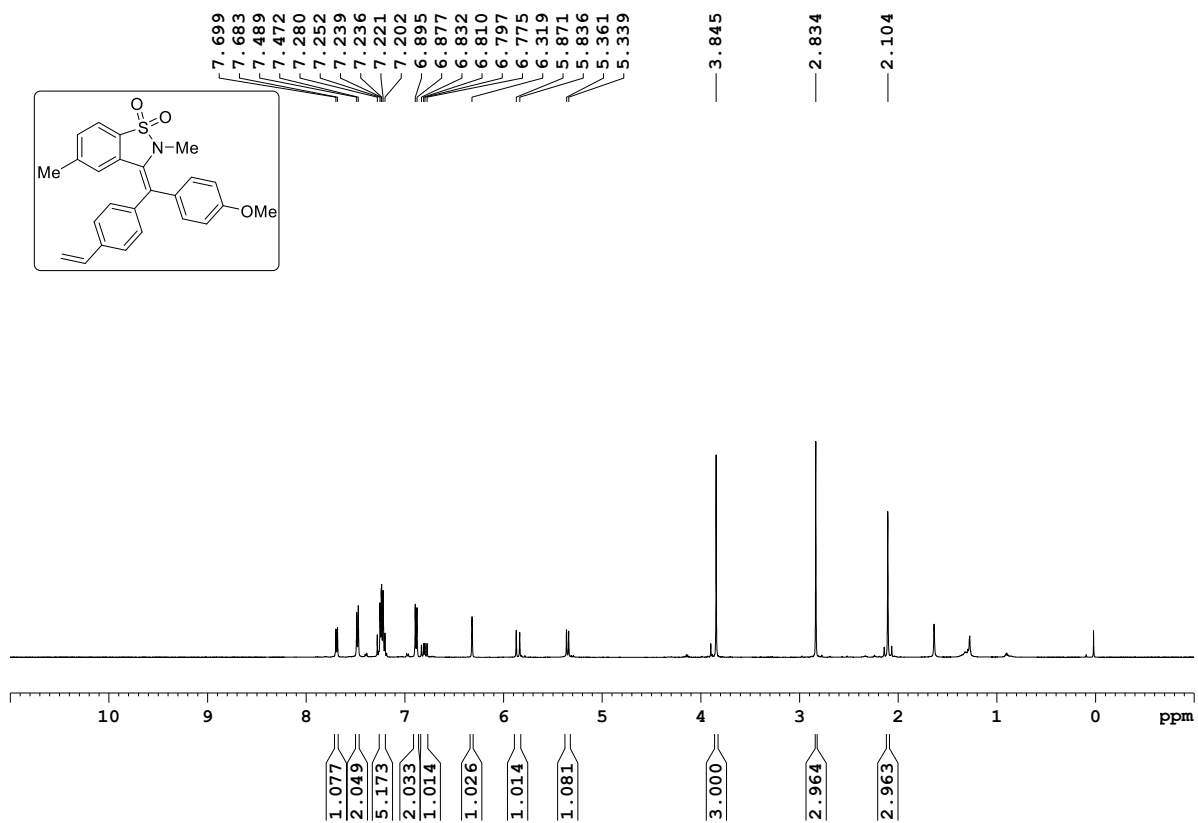

Figure S53. <sup>1</sup>H NMR spectrum of compound 3cg

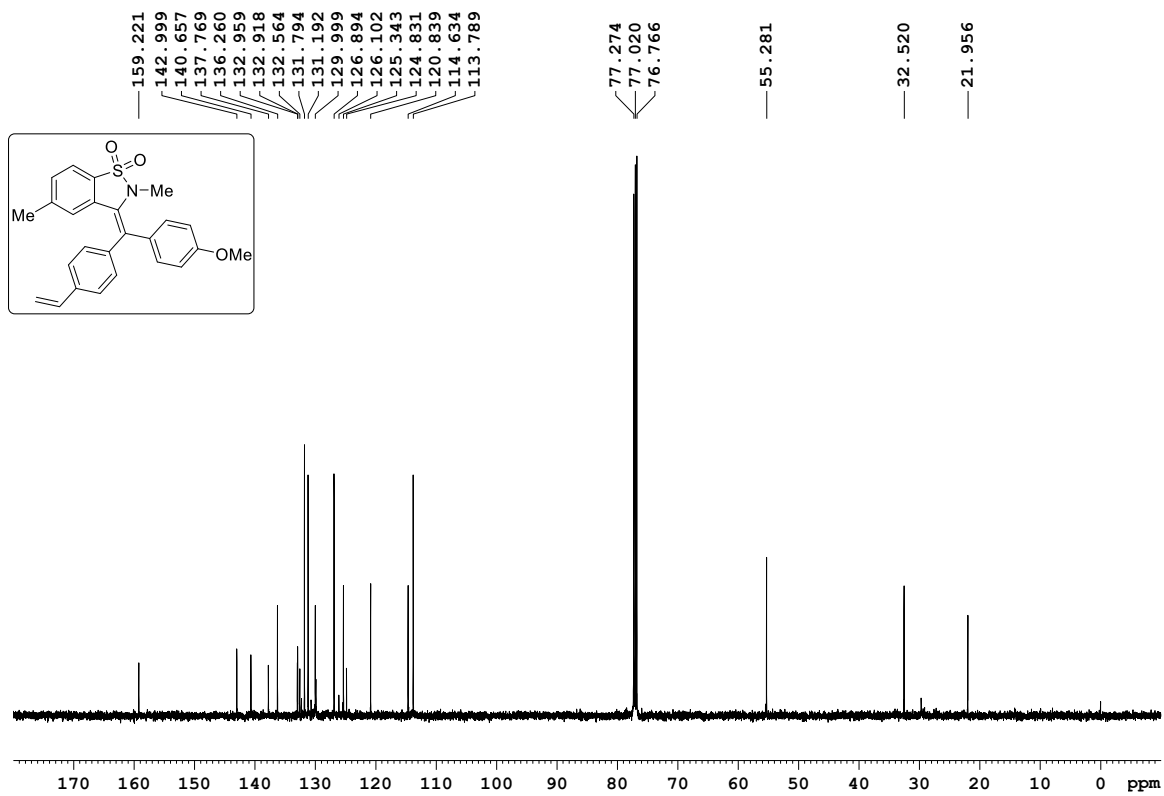

Figure S54. <sup>13</sup>C NMR spectrum of compound 3cg

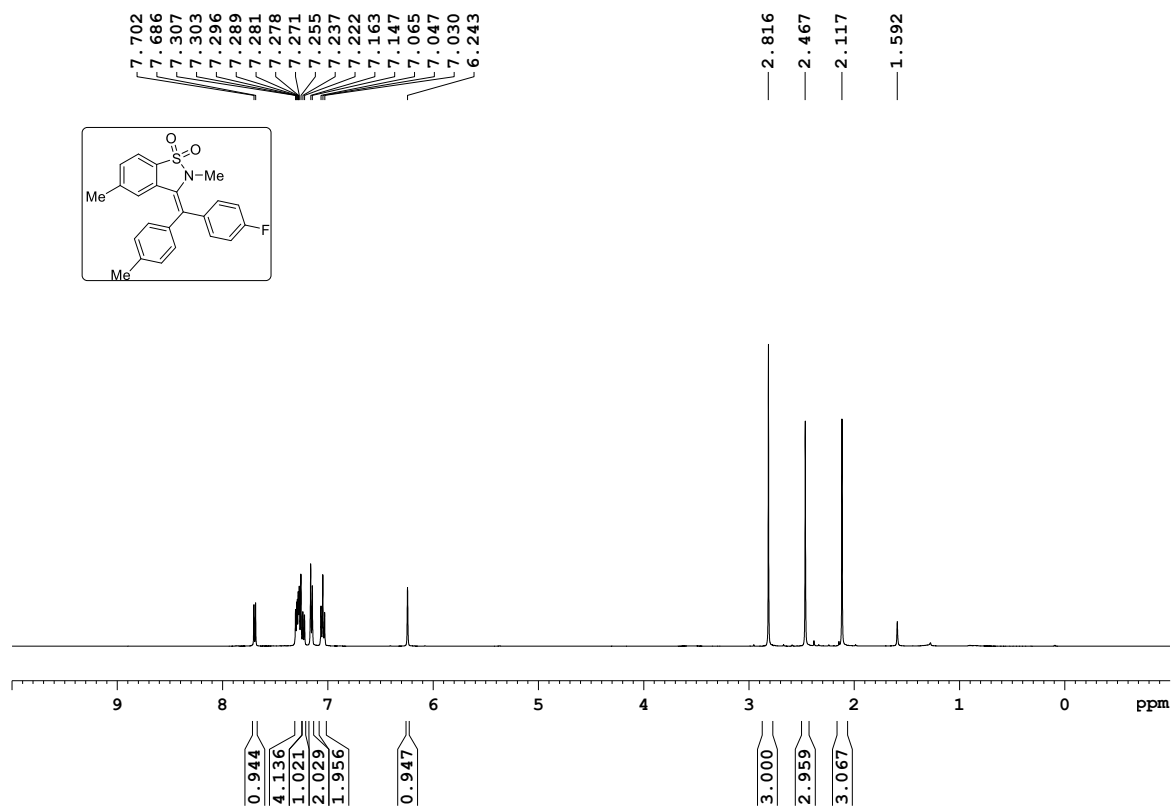

Figure S55. <sup>1</sup>H NMR spectrum of compound 3db

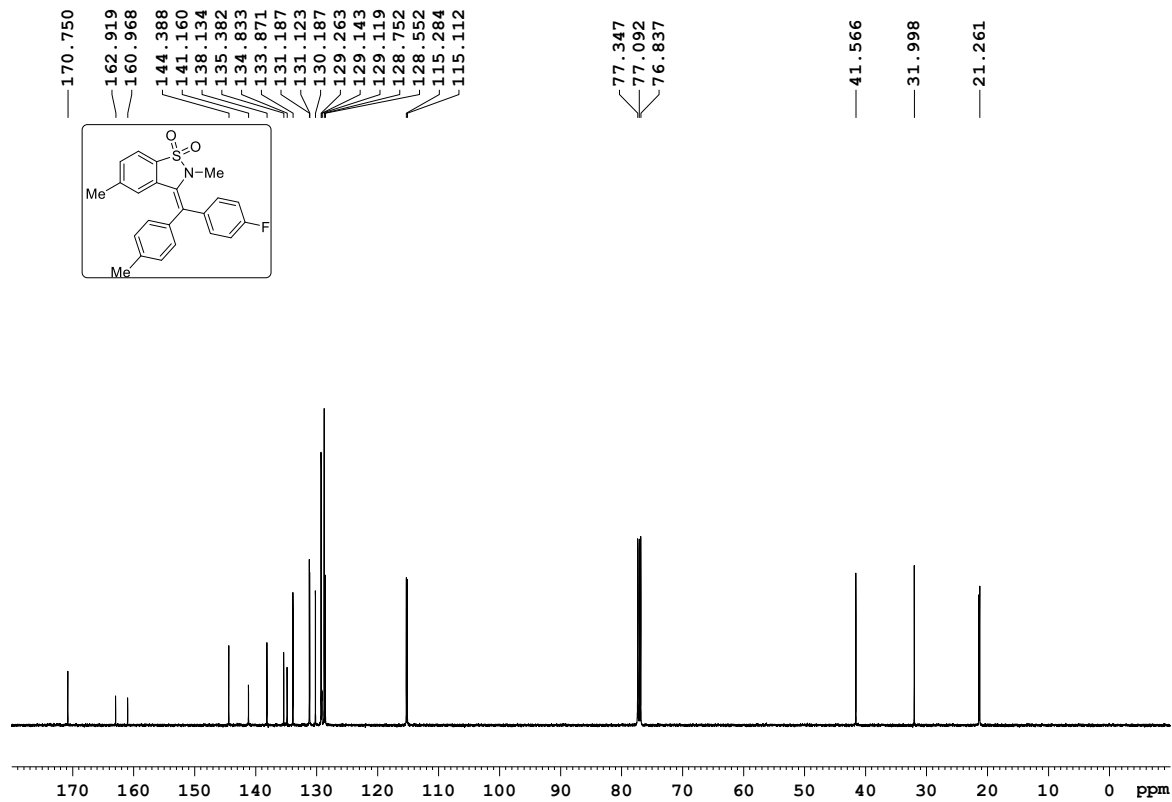

Figure S56. <sup>13</sup>C NMR spectrum of compound 3db

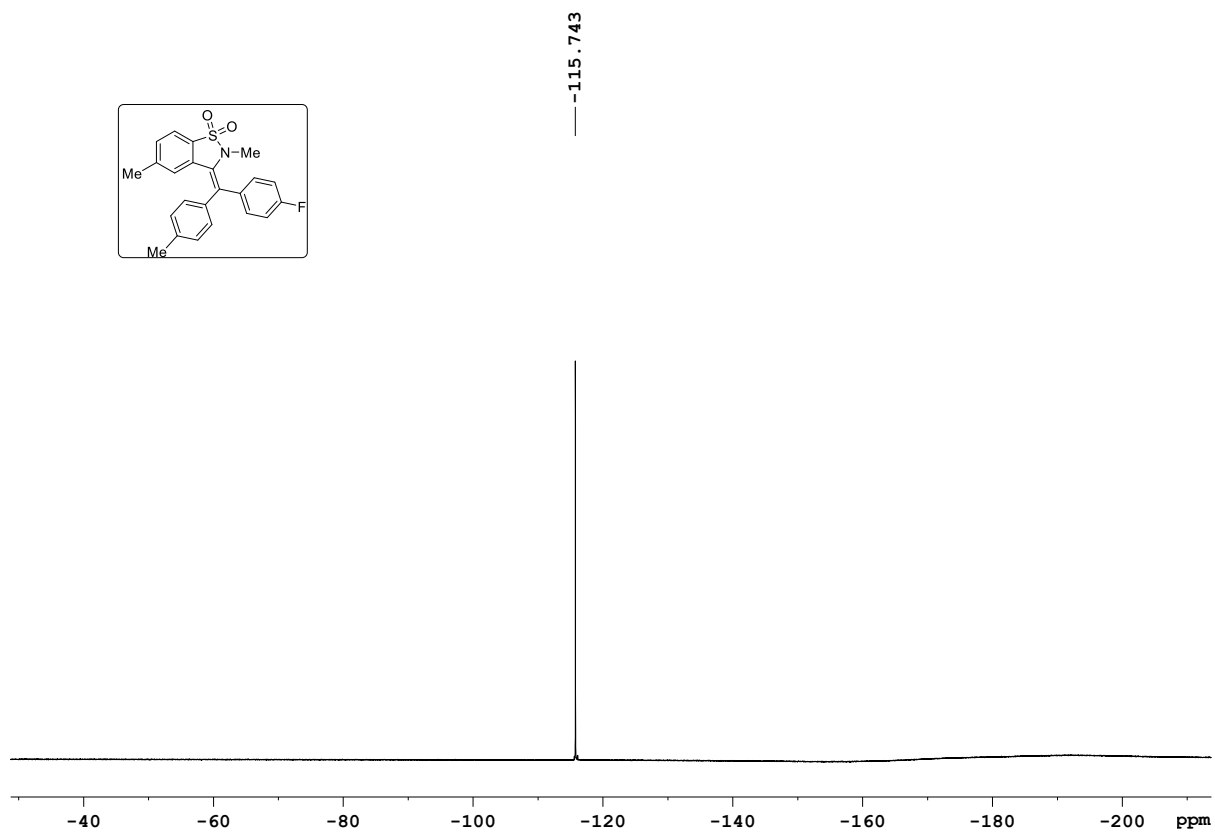

**Figure S57.**  $^{19}\text{F}$  NMR spectrum of compound **3db**



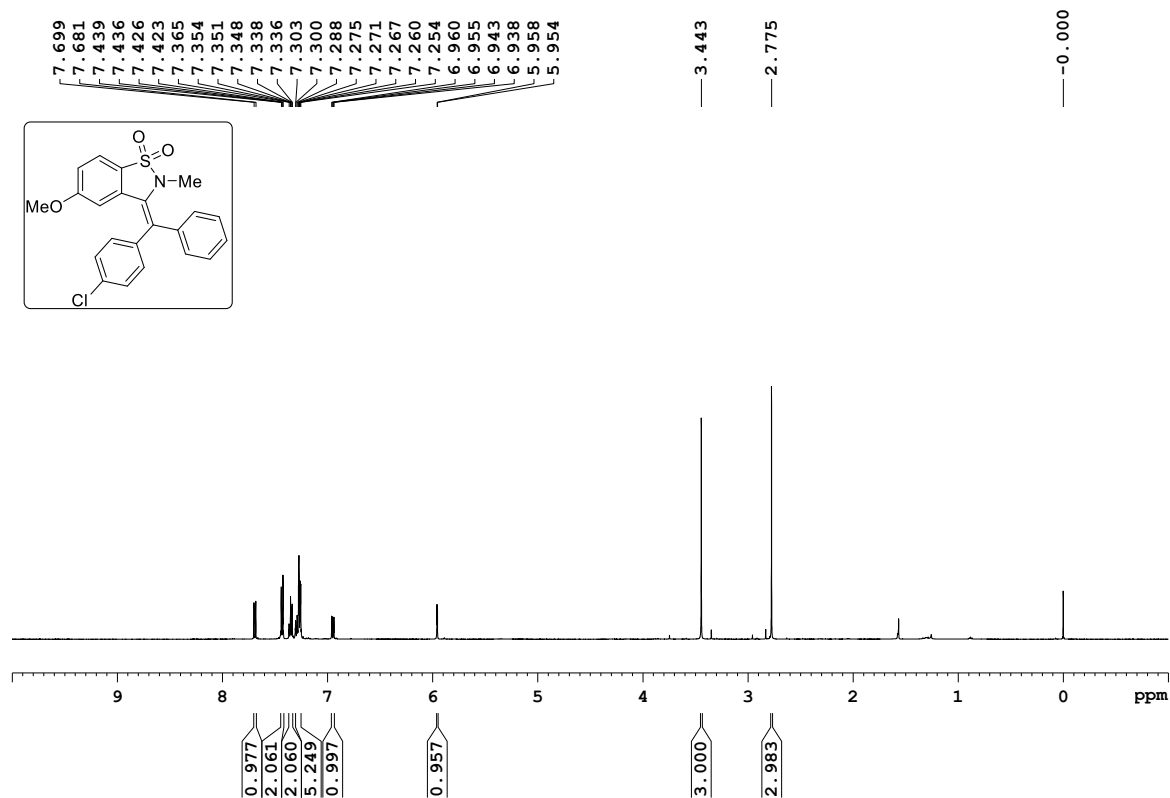

**Figure S58.** <sup>1</sup>H NMR spectrum of compound **3fd** (purity >96%)

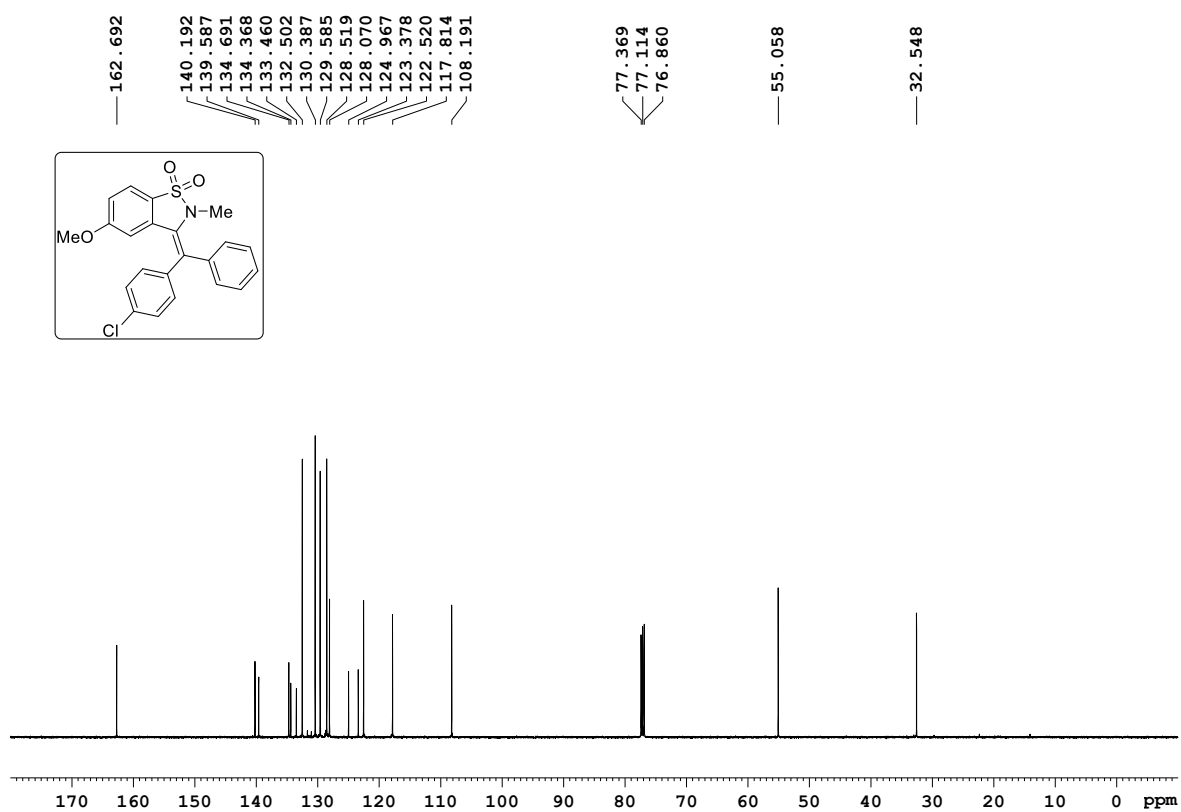

**Figure S59.** <sup>13</sup>C NMR spectrum of compound **3fd** (purity >96%)

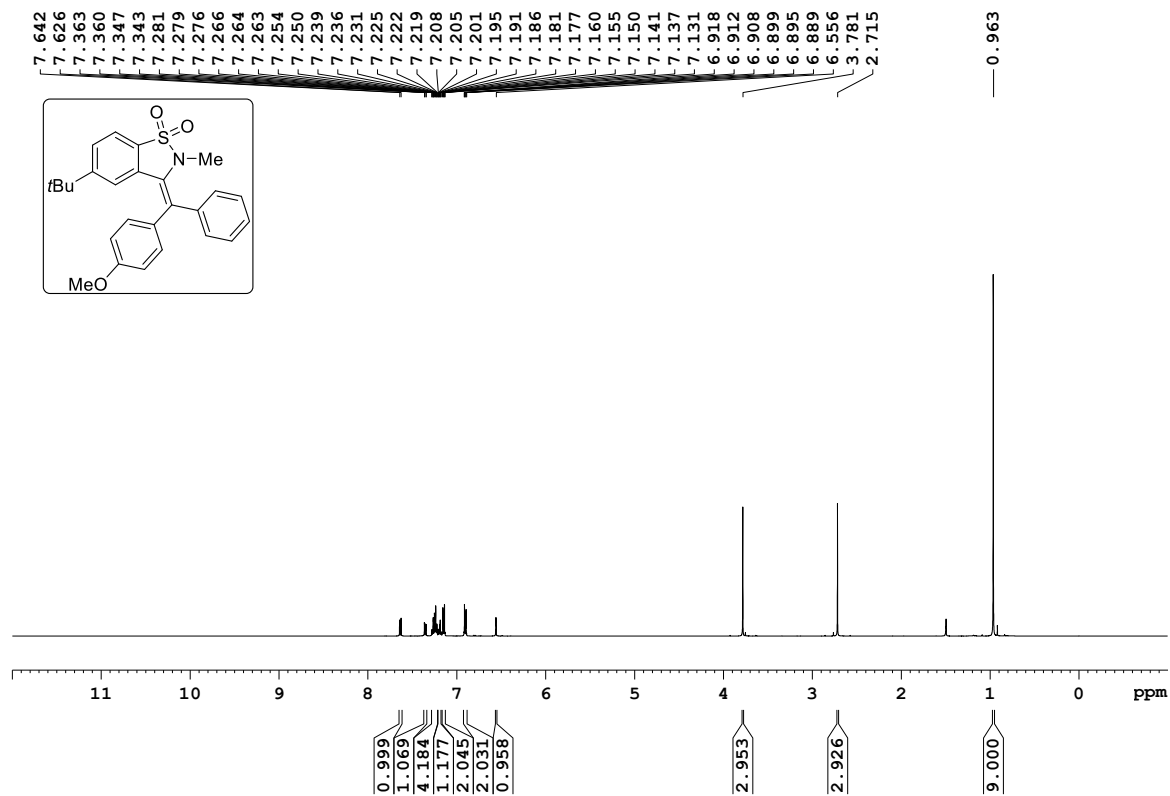

**Figure S60.** <sup>1</sup>H NMR spectrum of compound **3gc**

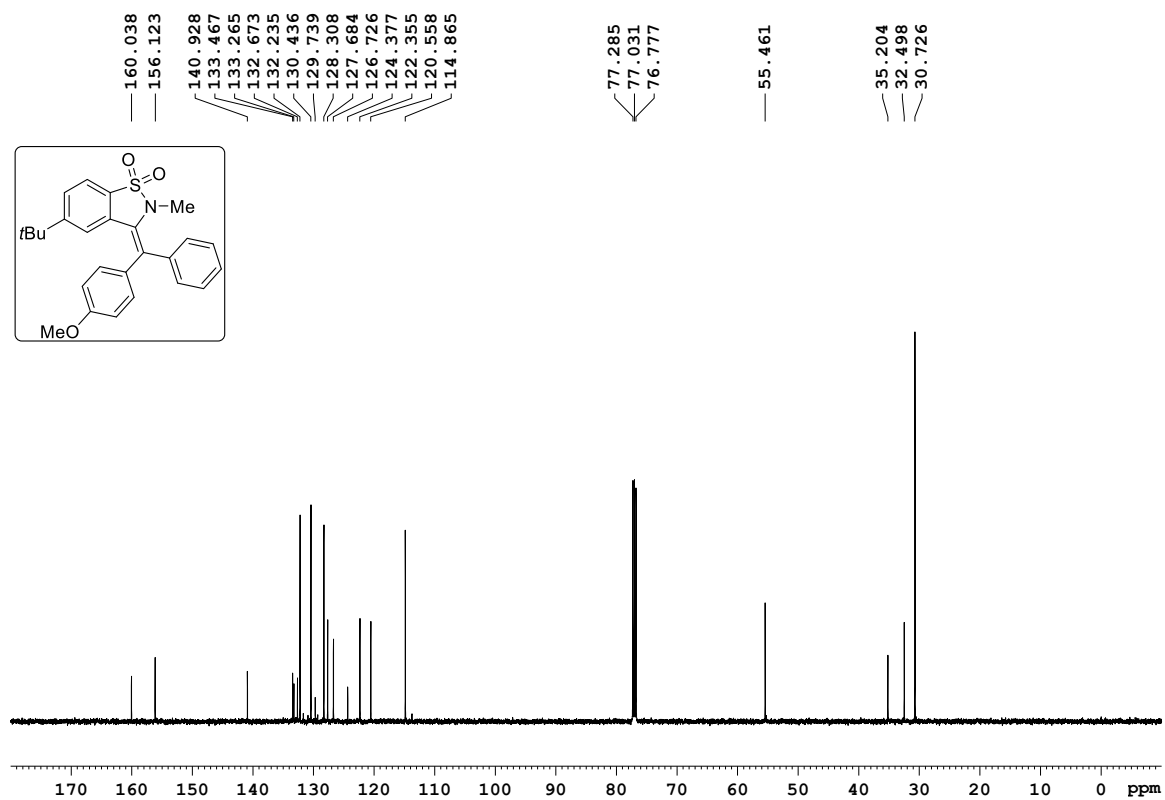

**Figure S61.** <sup>13</sup>C NMR spectrum of compound **3gc**

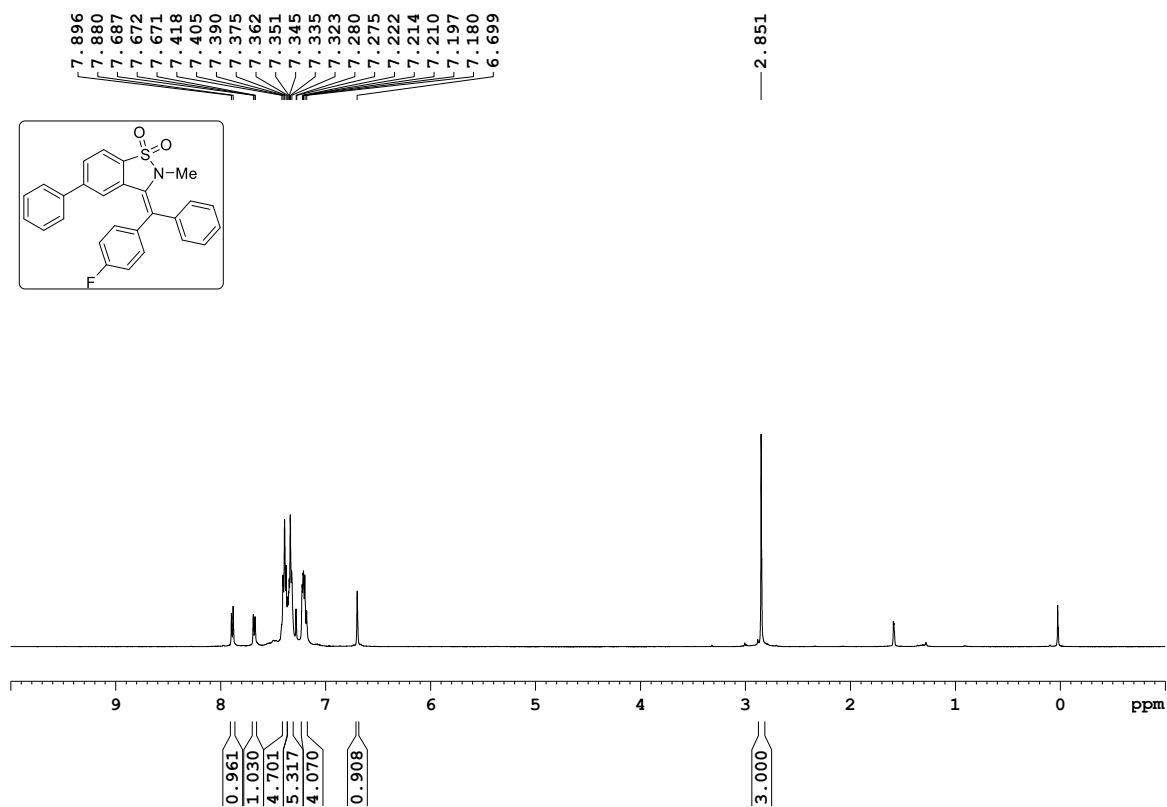

**Figure S62.** <sup>1</sup>H NMR spectrum of compound **3he**

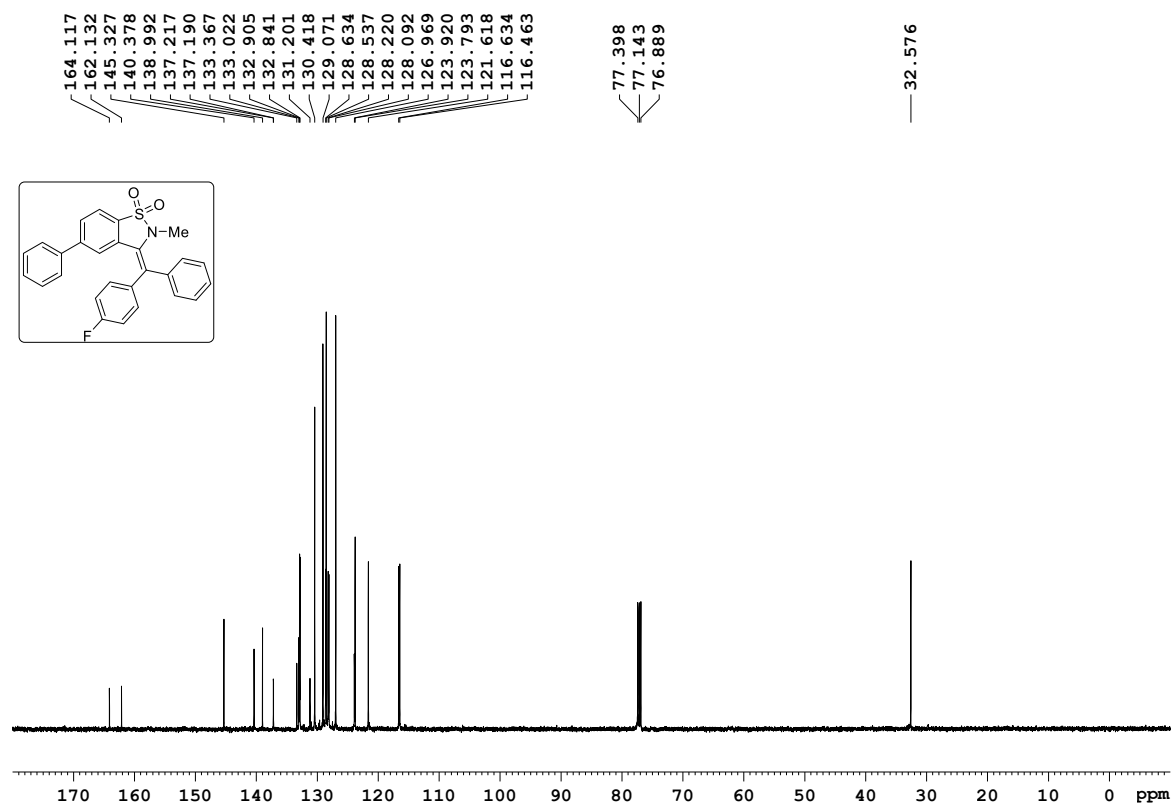

**Figure S63.** <sup>13</sup>C NMR spectrum of compound **3he**

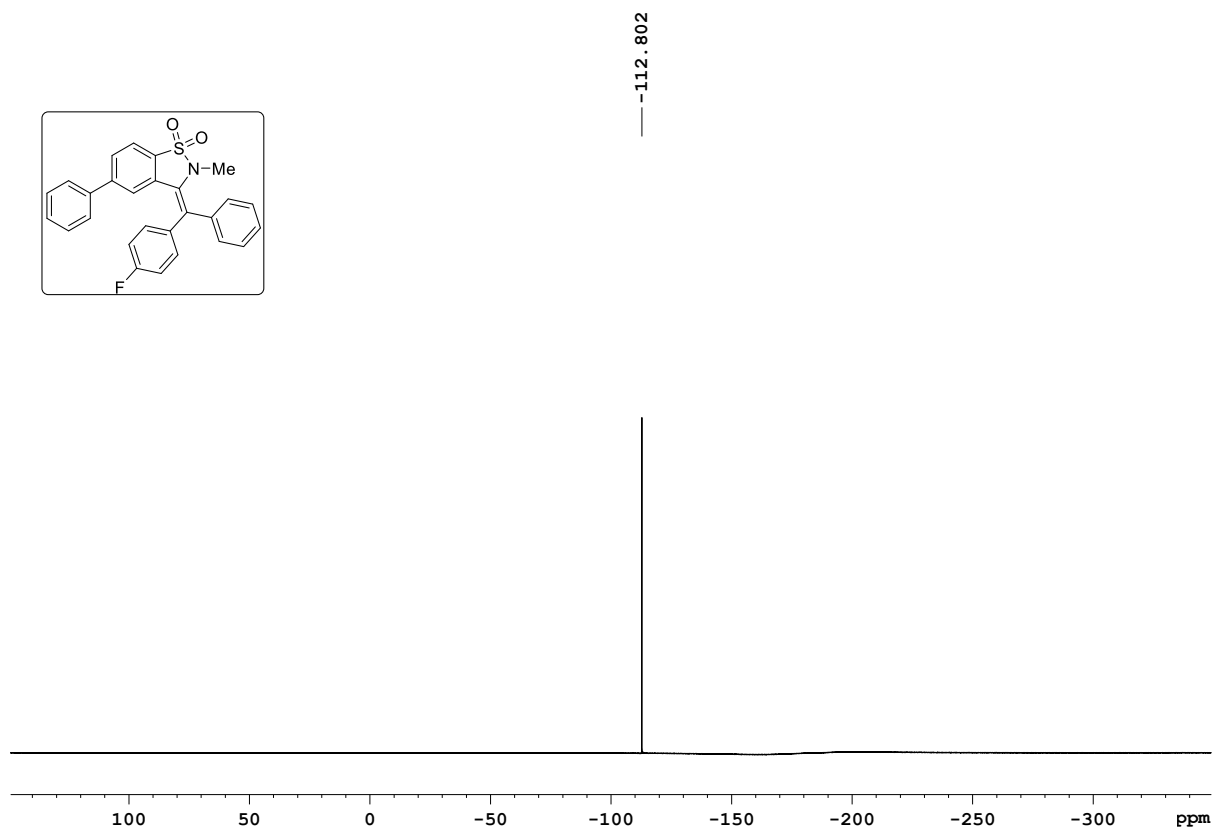

**Figure S64.**  $^{19}\text{F}$  NMR spectrum of compound **3he**

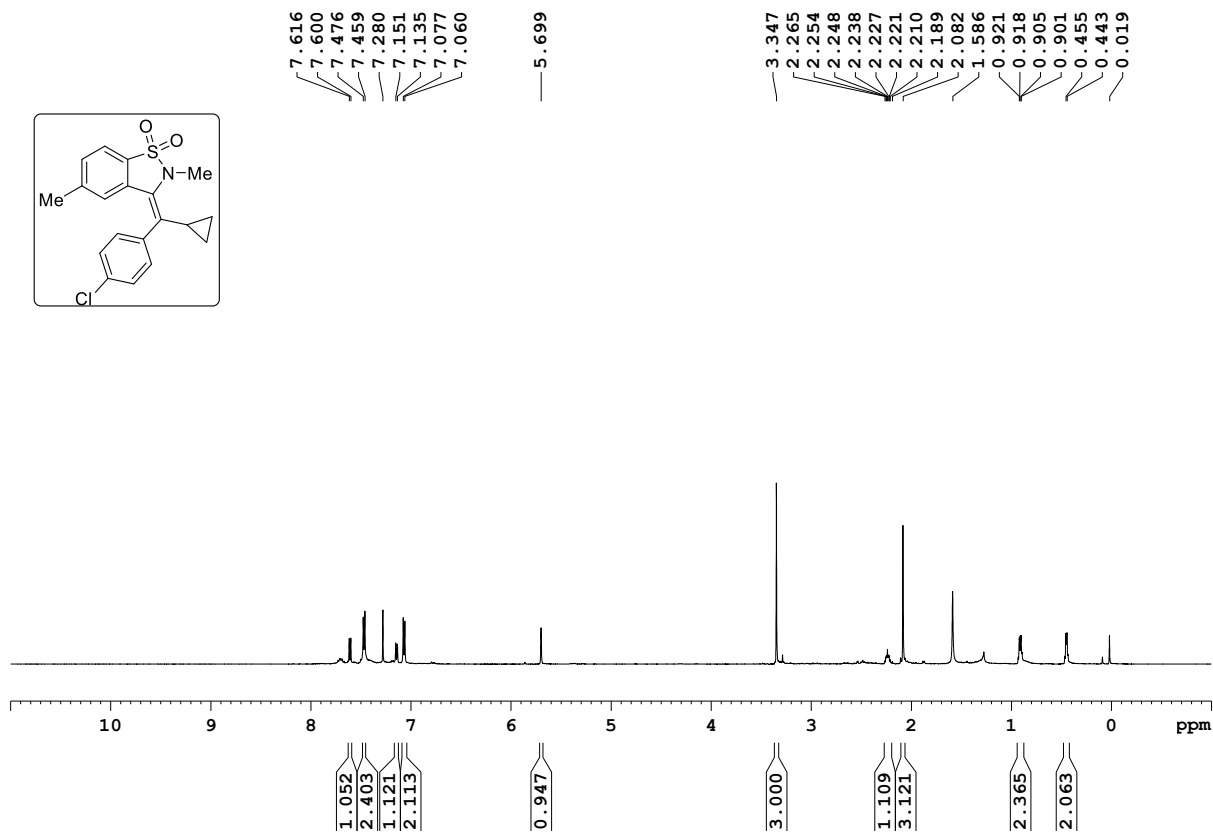

**Figure S65.** <sup>1</sup>H NMR spectrum of compound **3id** (purity >96%)

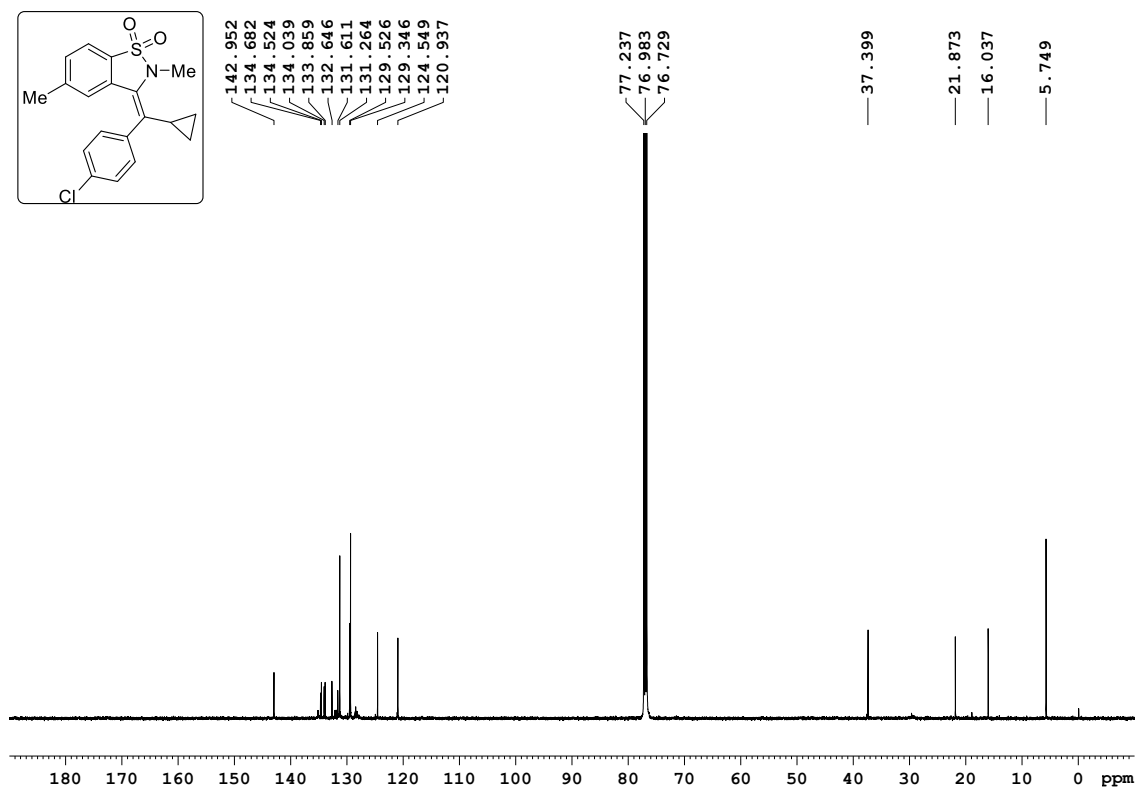

**Figure S66.** <sup>13</sup>C NMR spectrum of compound **3id** (purity >96%)

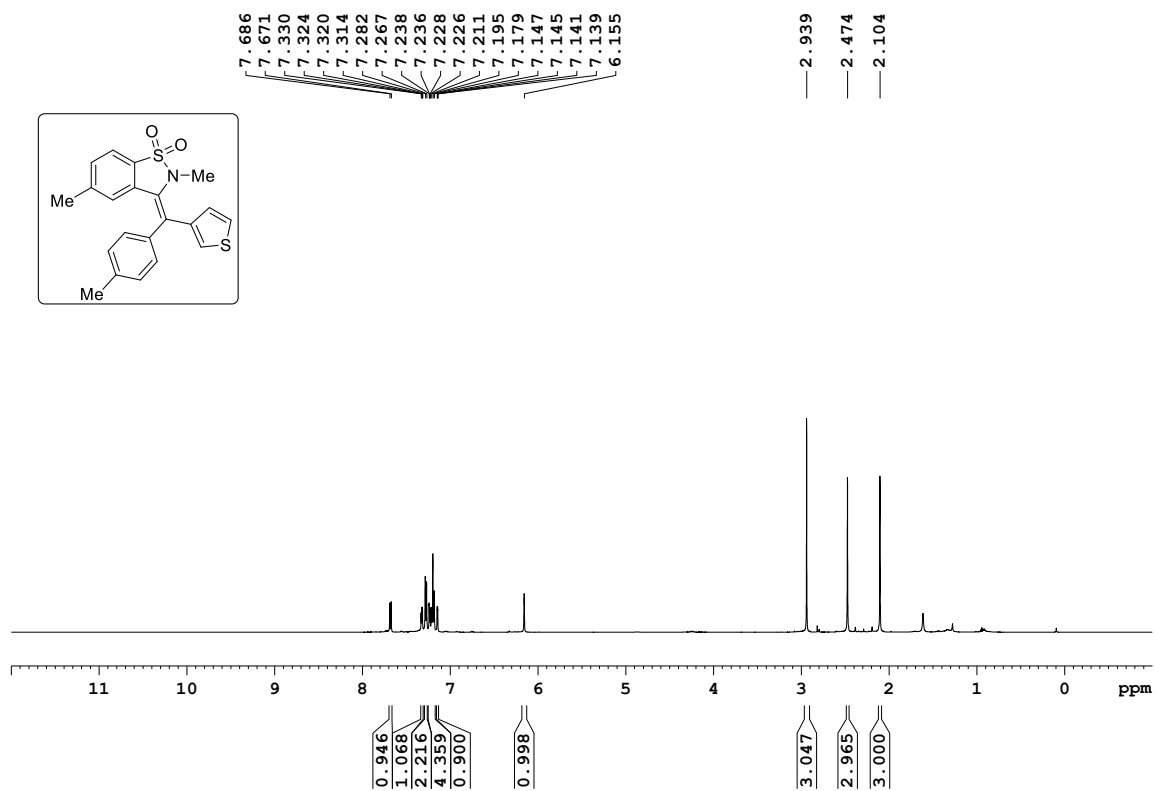

Figure S67. <sup>1</sup>H NMR spectrum of compound **3jb**

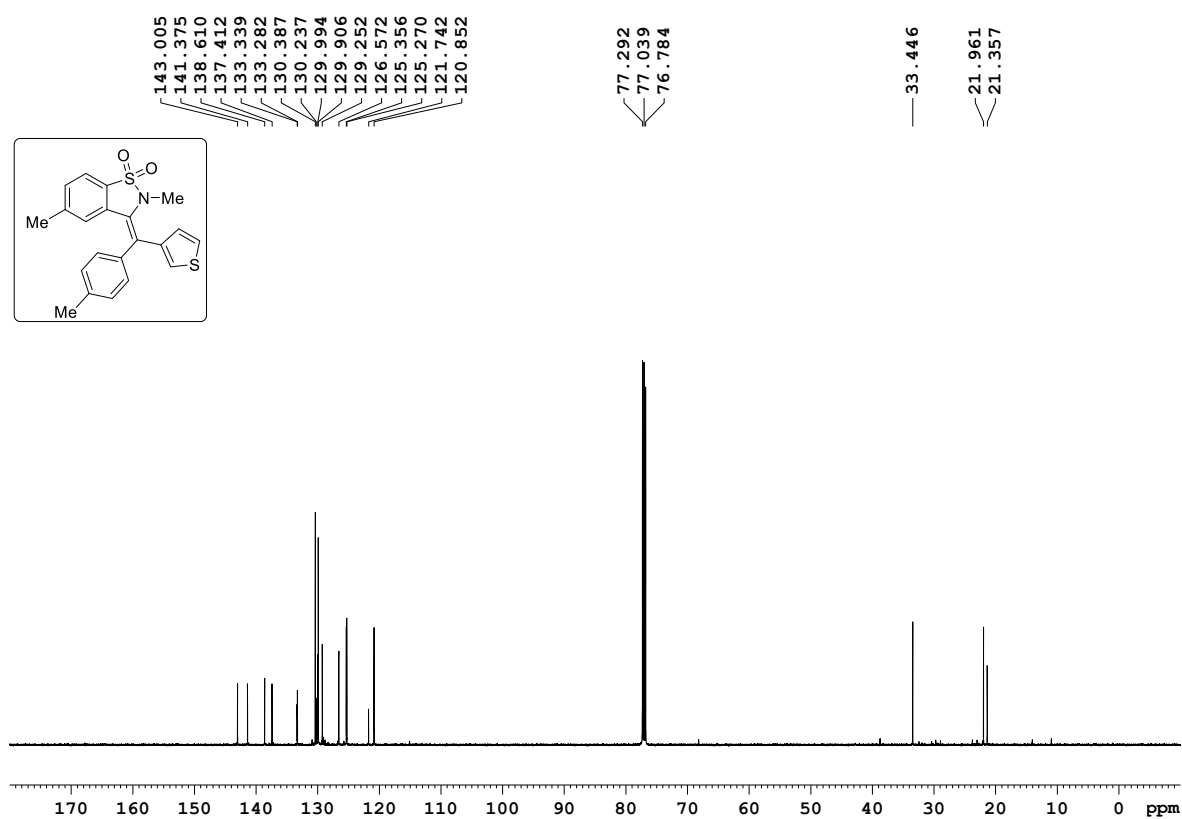

Figure S68. <sup>13</sup>C NMR spectrum of compound **3jb**

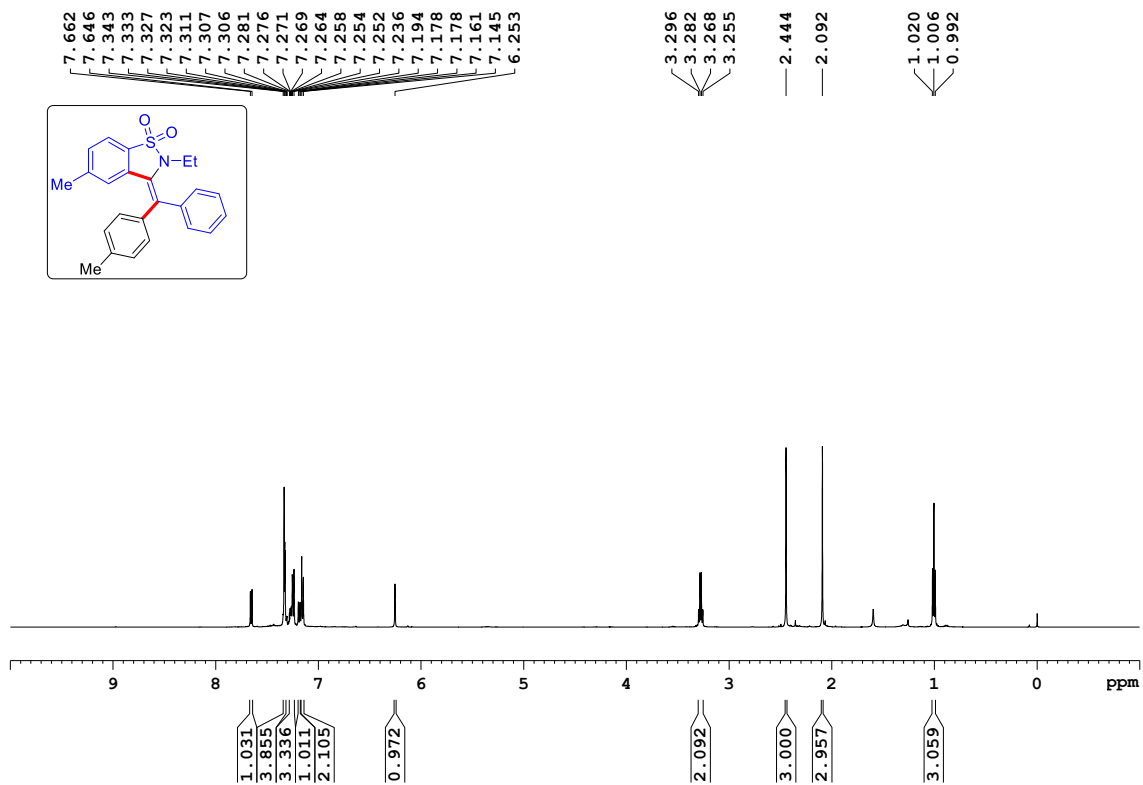

Figure S69. <sup>1</sup>H NMR spectrum of compound 31b

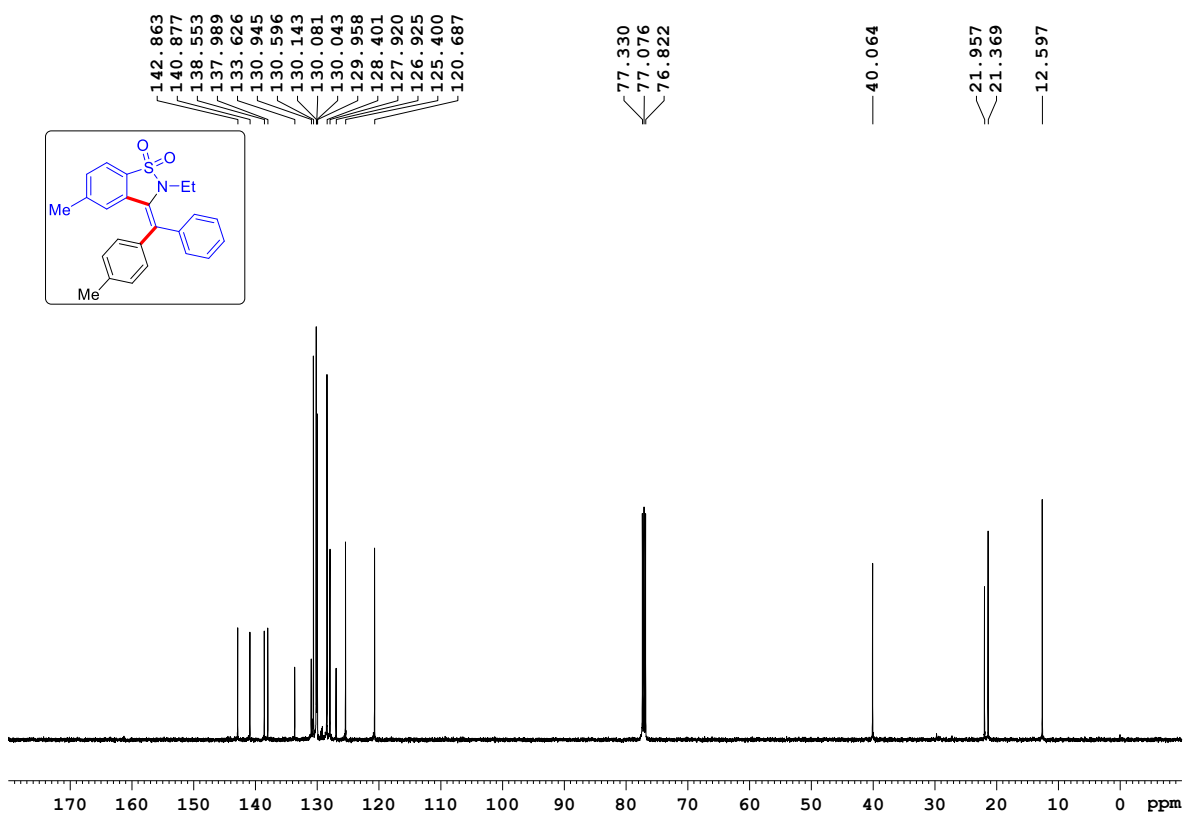

Figure S70. <sup>13</sup>C NMR spectrum of compound 31b

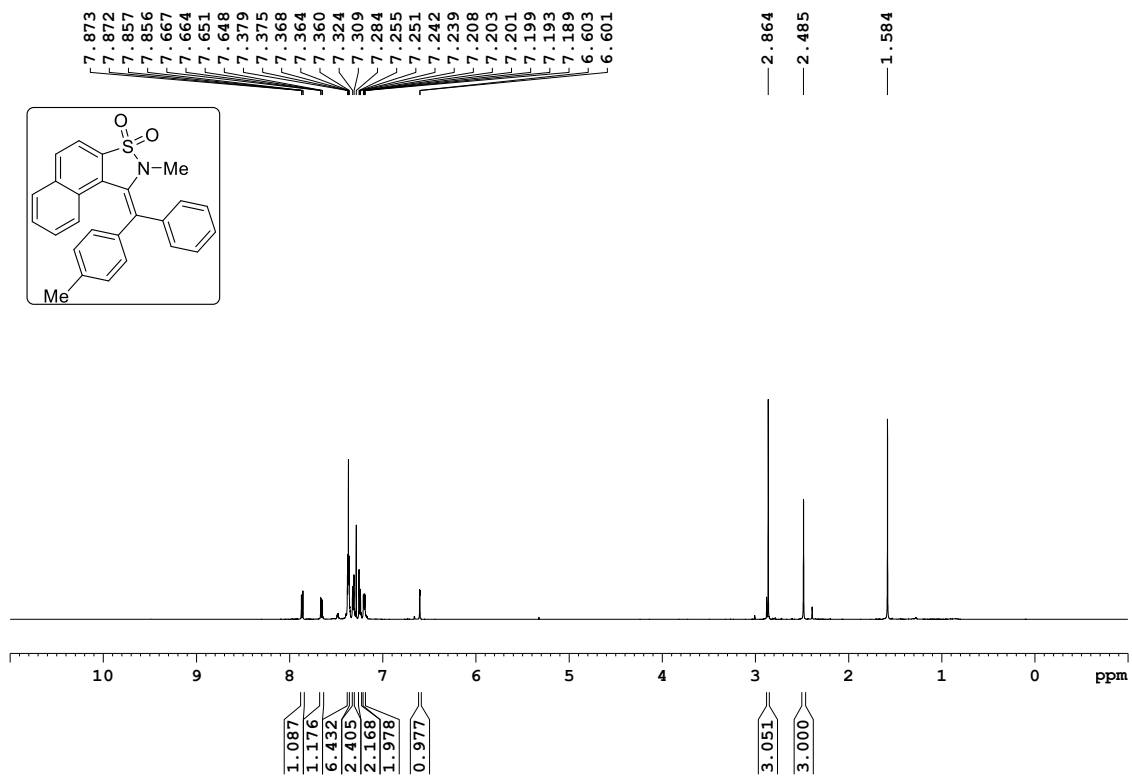

**Figure S71.** <sup>1</sup>H NMR spectrum of compound **3ob**

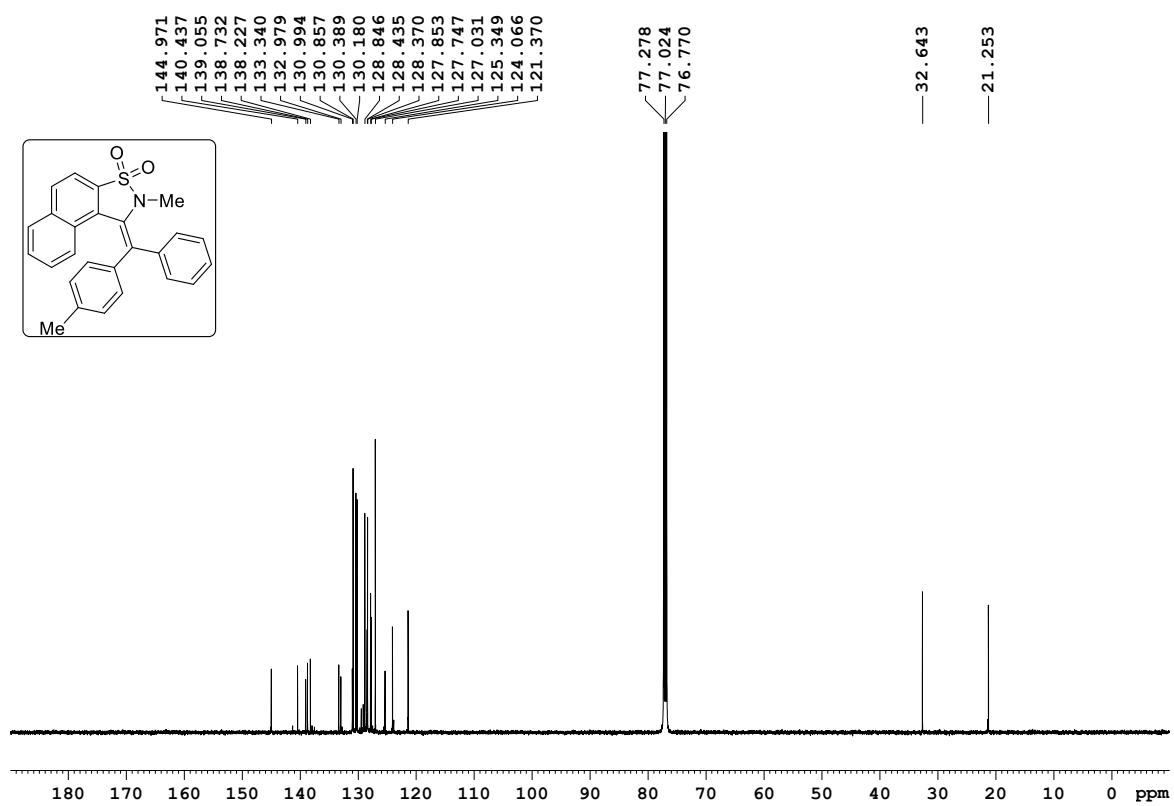

**Figure S72.** <sup>13</sup>C NMR spectrum of compound **3ob**



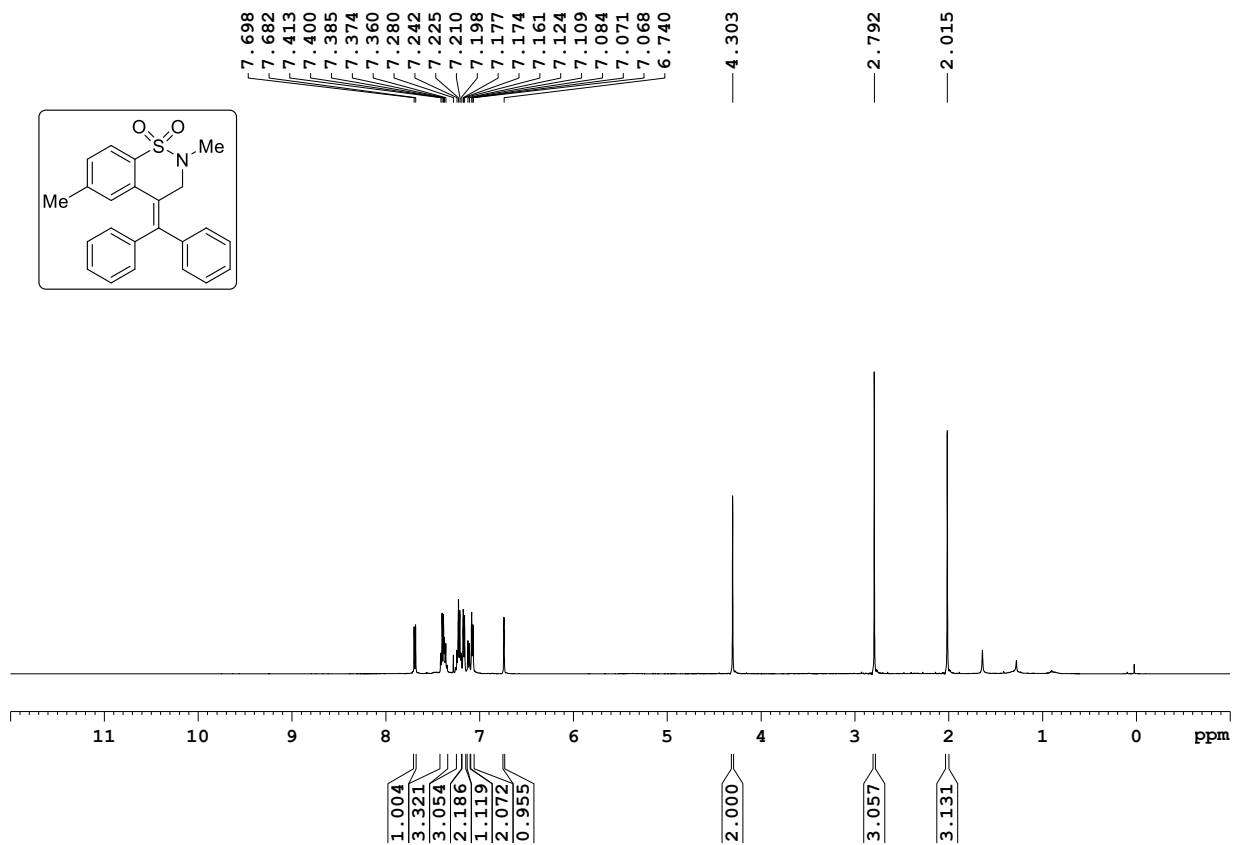

Figure S73. <sup>1</sup>H NMR spectrum of compound 5aa

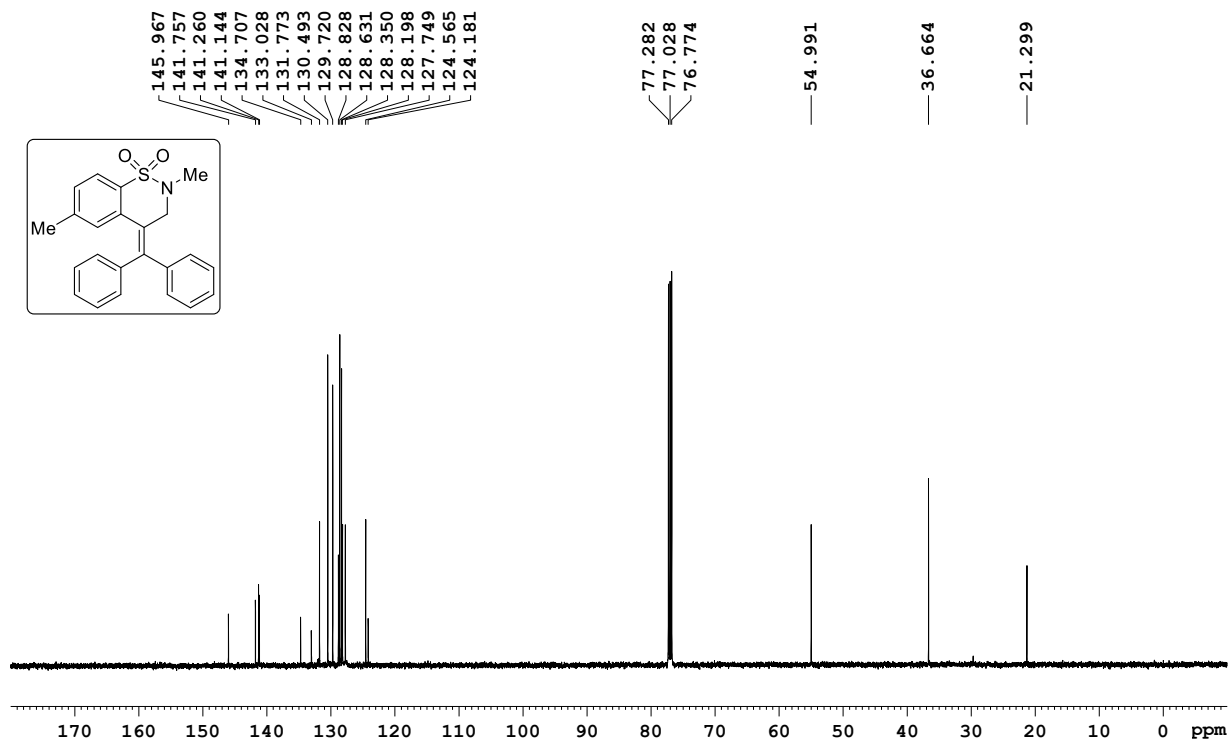

Figure S74. <sup>13</sup>C NMR spectrum of compound 5aa

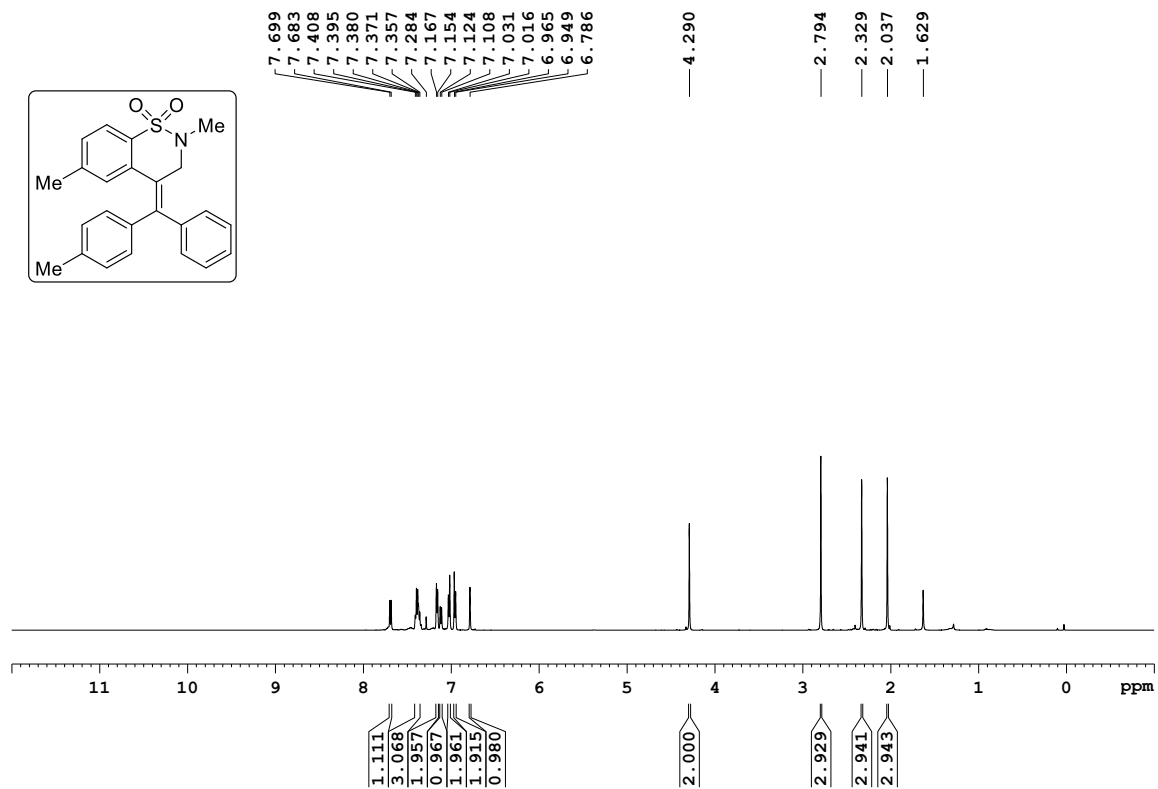

**Figure S75.** <sup>1</sup>H NMR spectrum of compound **5ab**

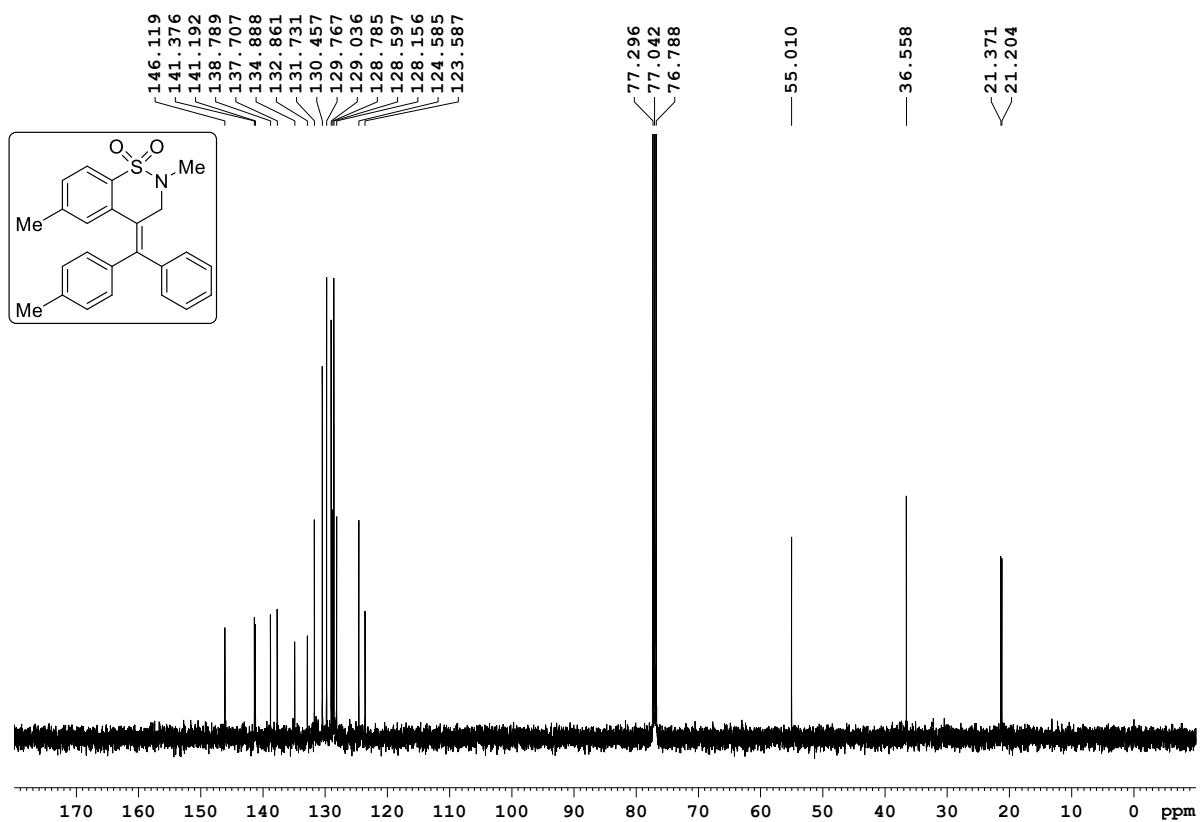

**Figure S76.** <sup>13</sup>C NMR spectrum of compound **5ab**

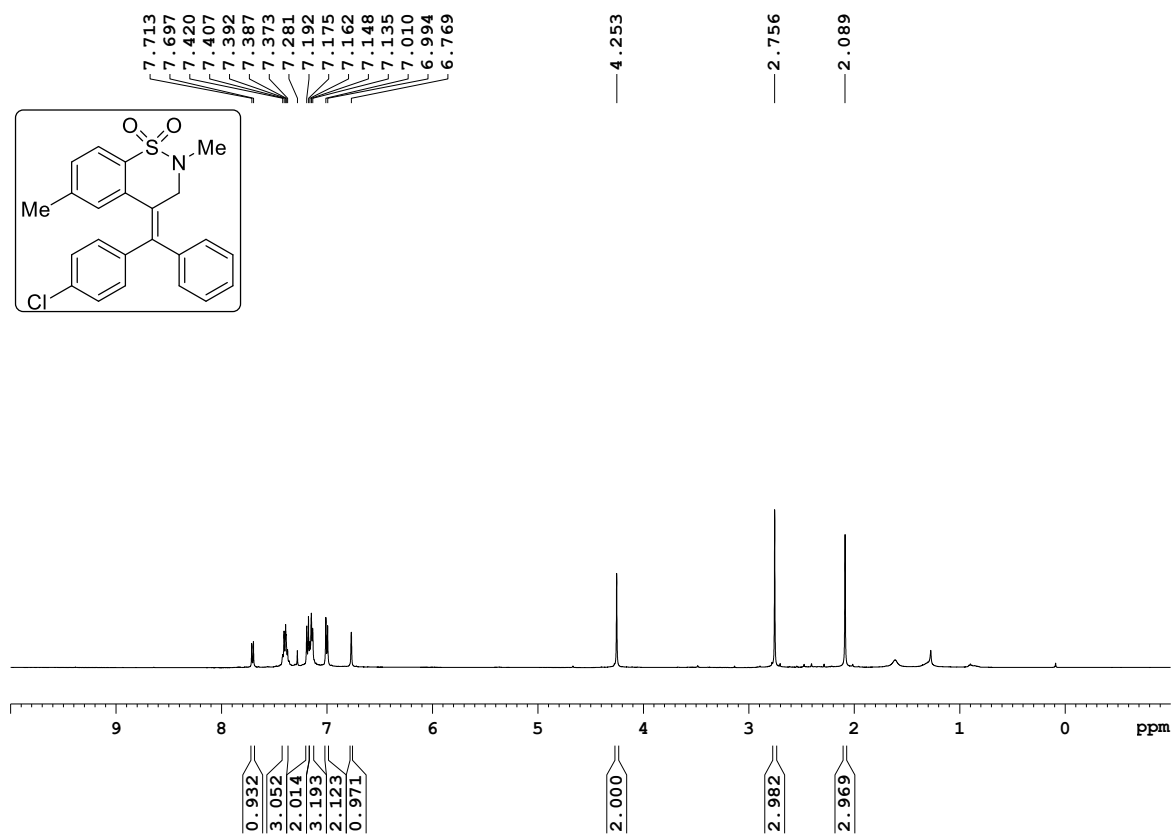

Figure S77. <sup>1</sup>H NMR spectrum of compound 5ad

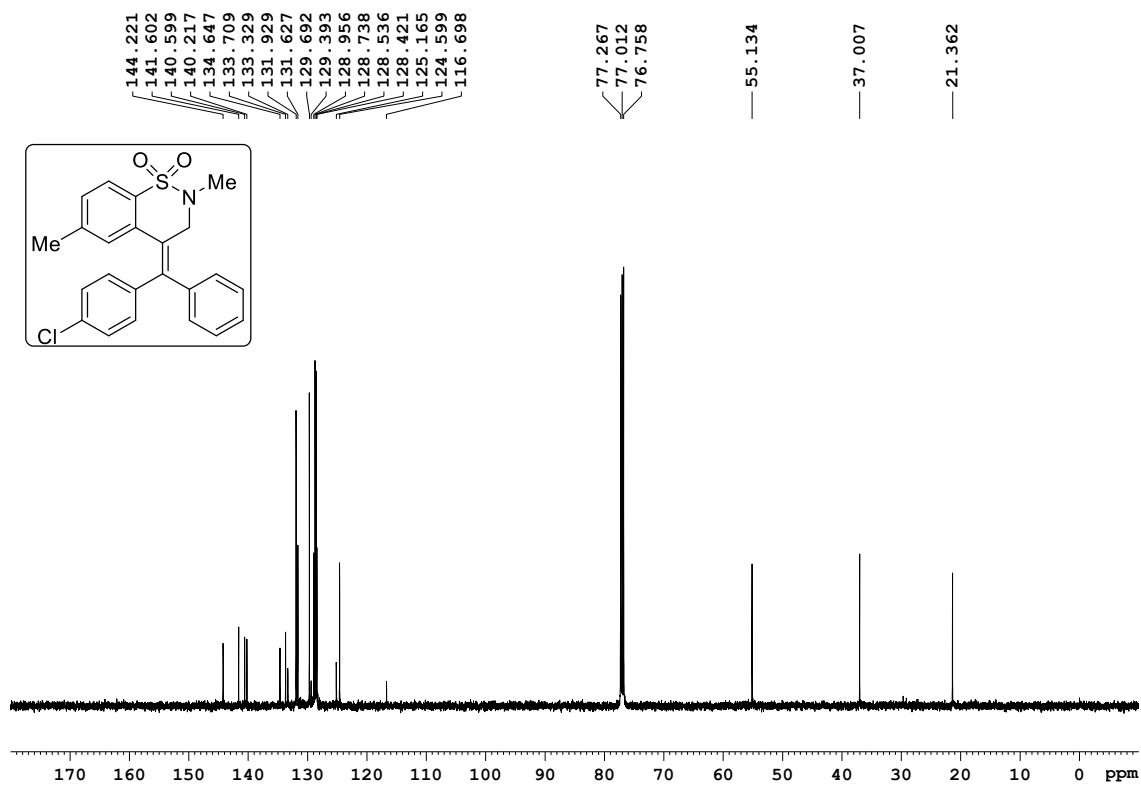

Figure S78. <sup>13</sup>C NMR spectrum of compound 5ad

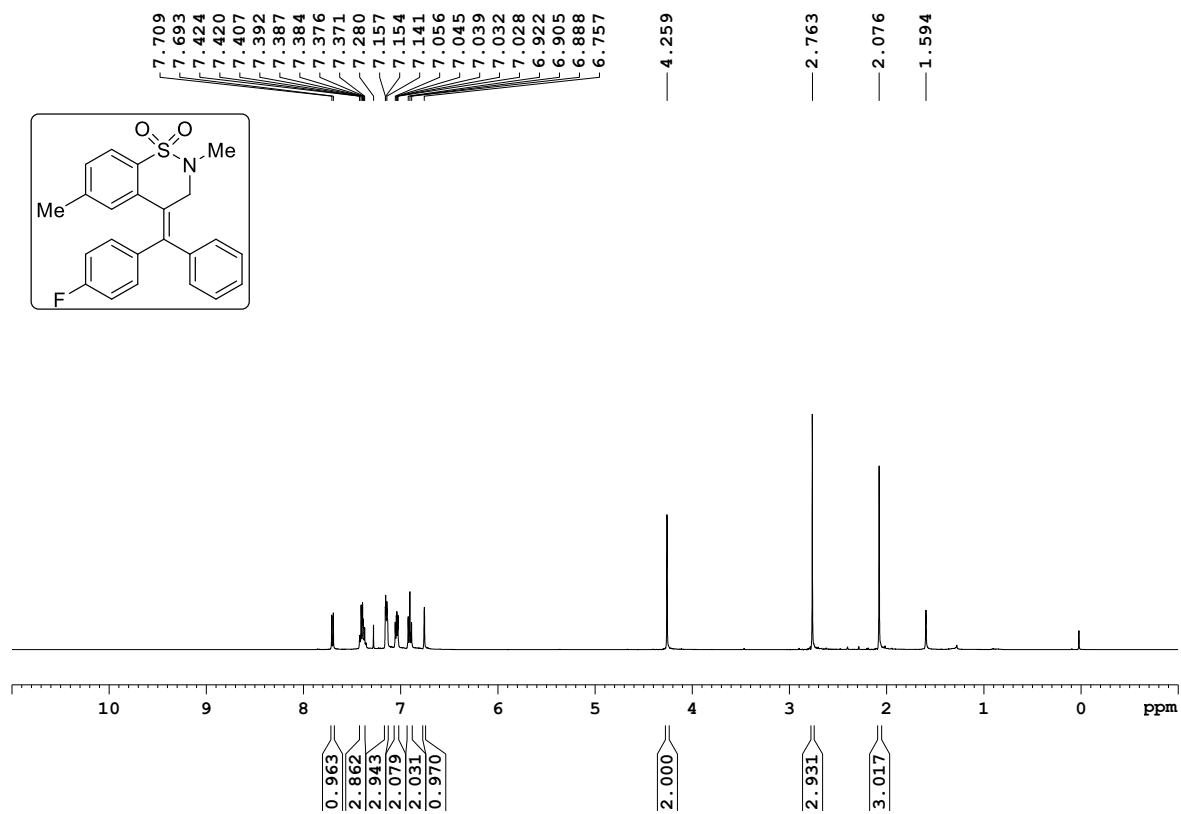

Figure S79. <sup>1</sup>H NMR spectrum of compound 5ae

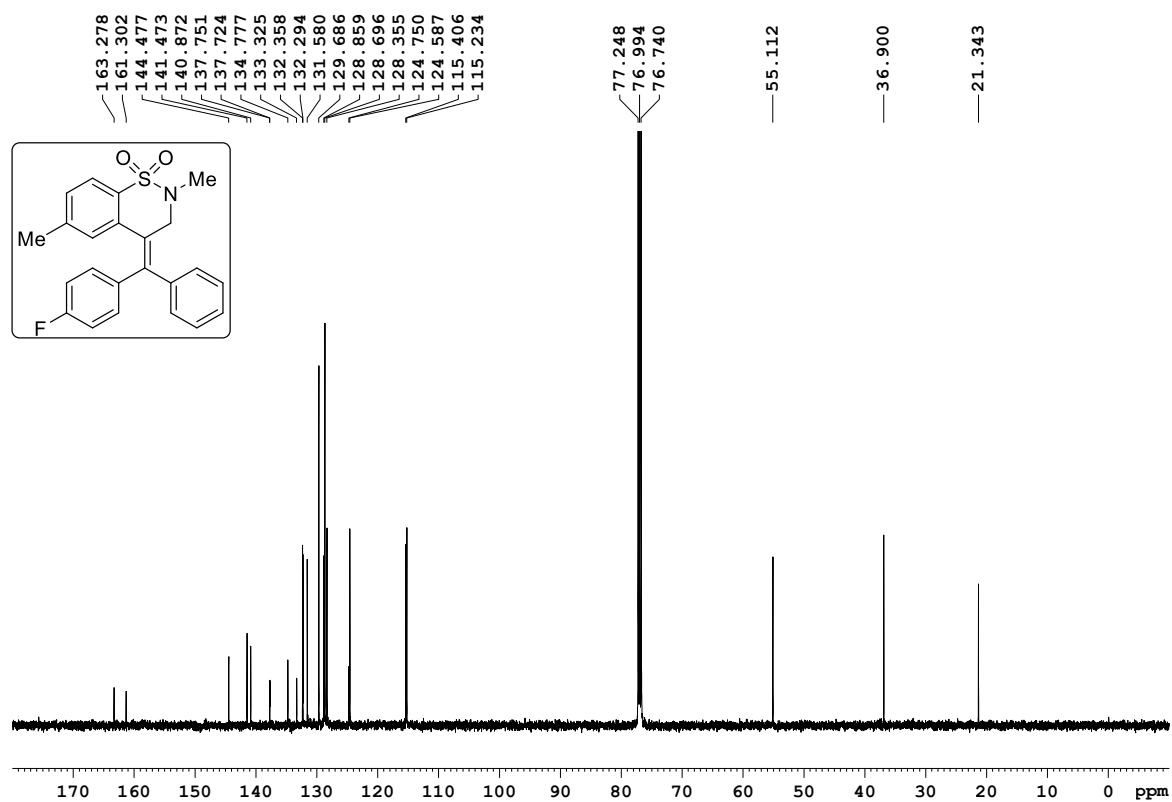

Figure S80. <sup>13</sup>C NMR spectrum of compound 5ae

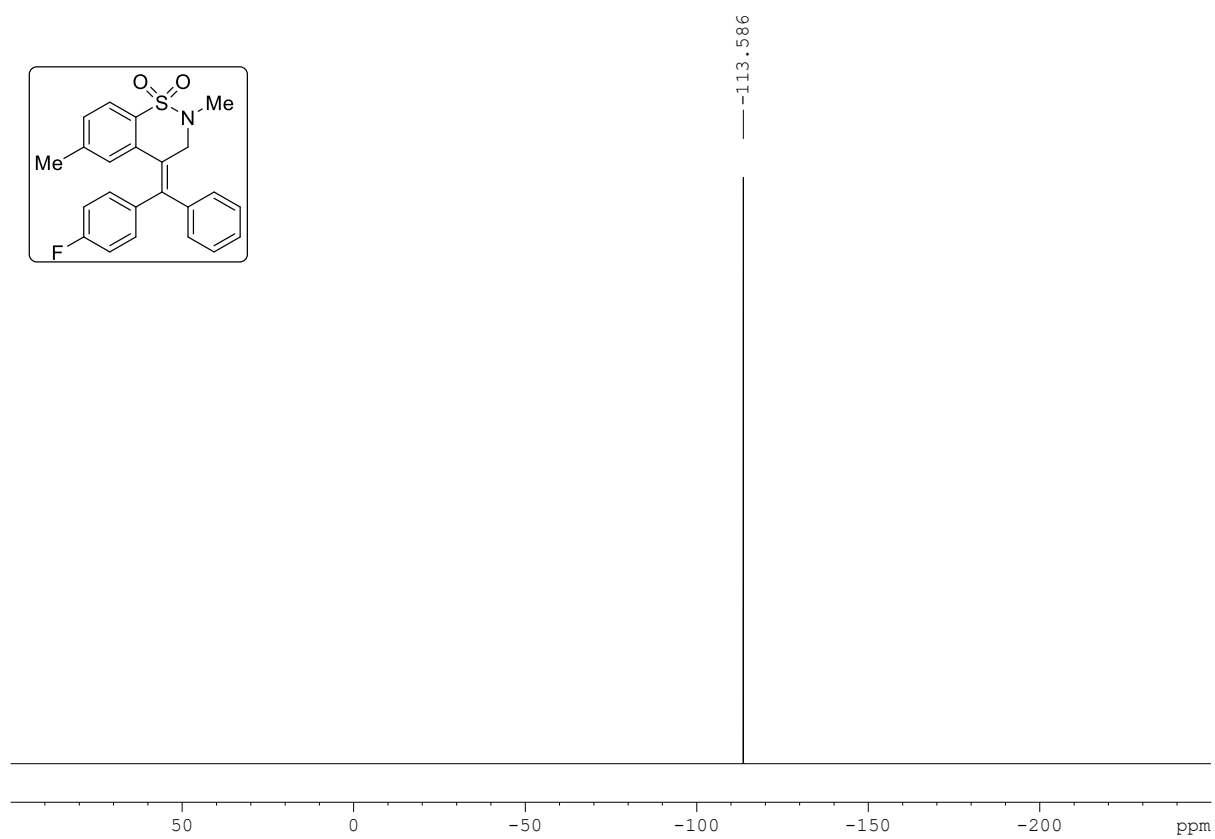

**Figure S81.**  $^{19}\text{F}$  NMR spectrum of compound **5ae**

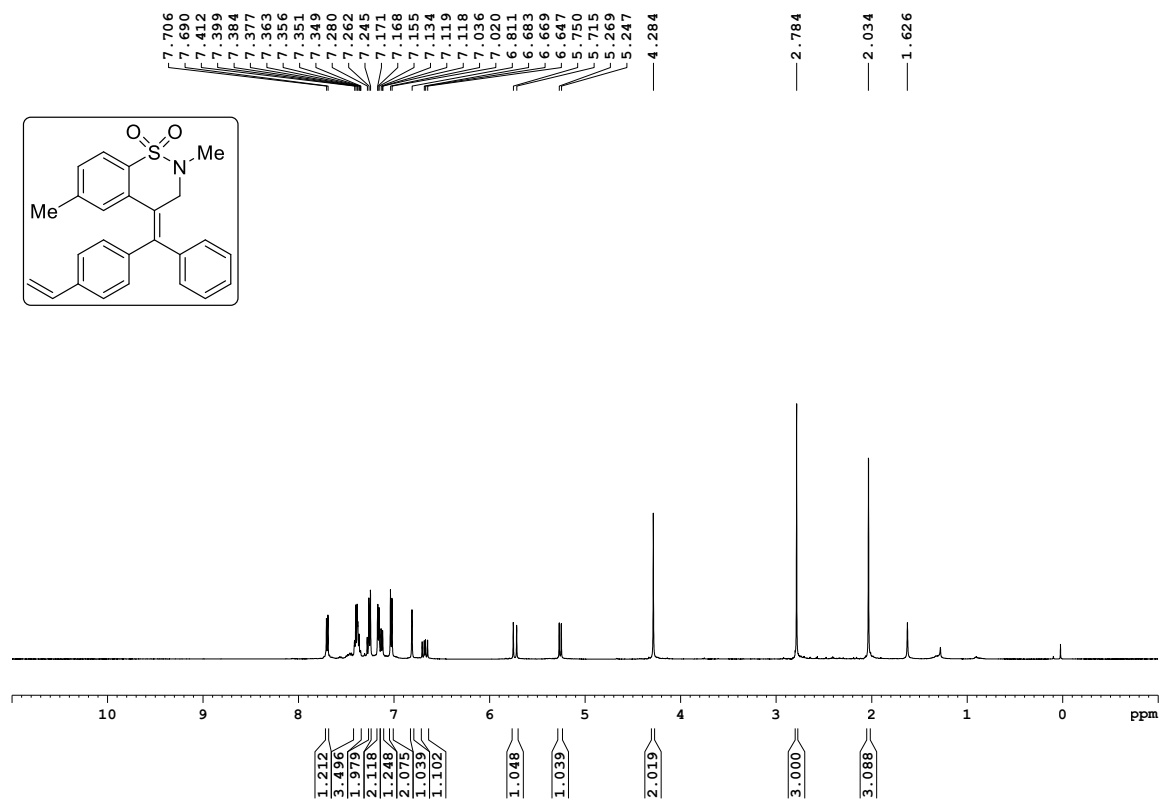

Figure S82. <sup>1</sup>H NMR spectrum of compound **5ag**

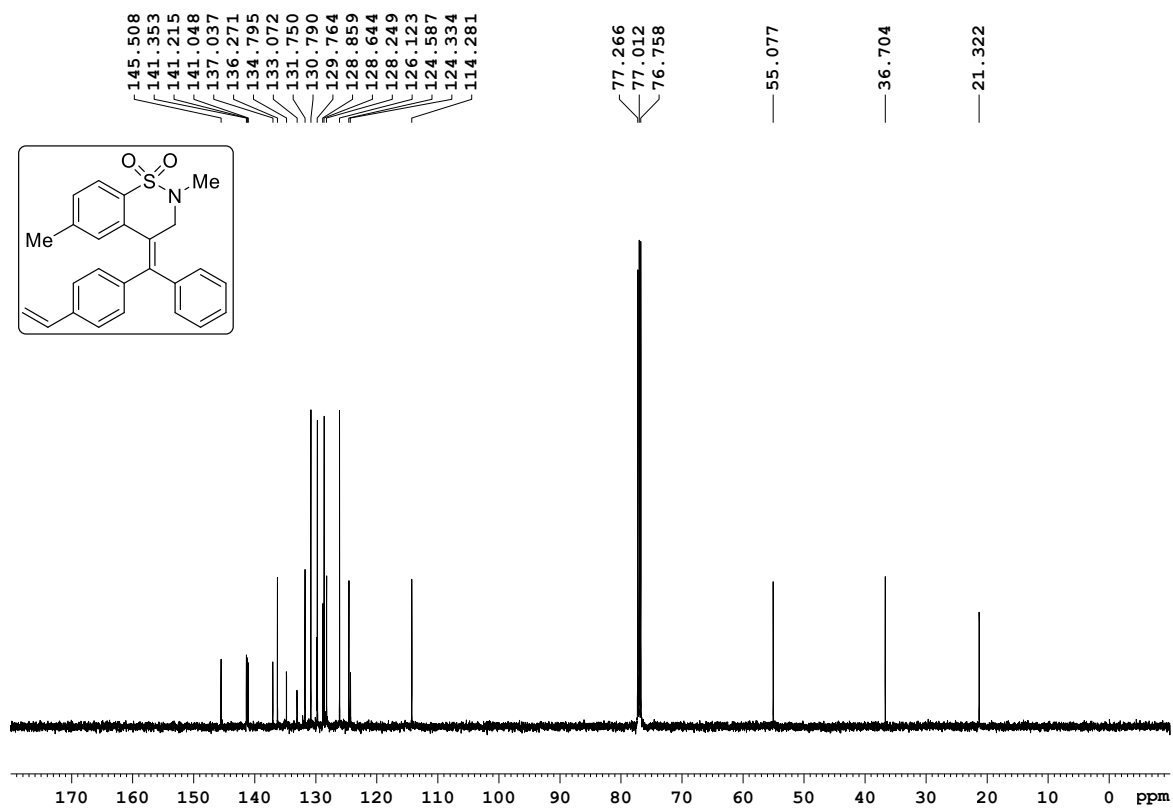

Figure S83. <sup>13</sup>C NMR spectrum of compound **5ag**

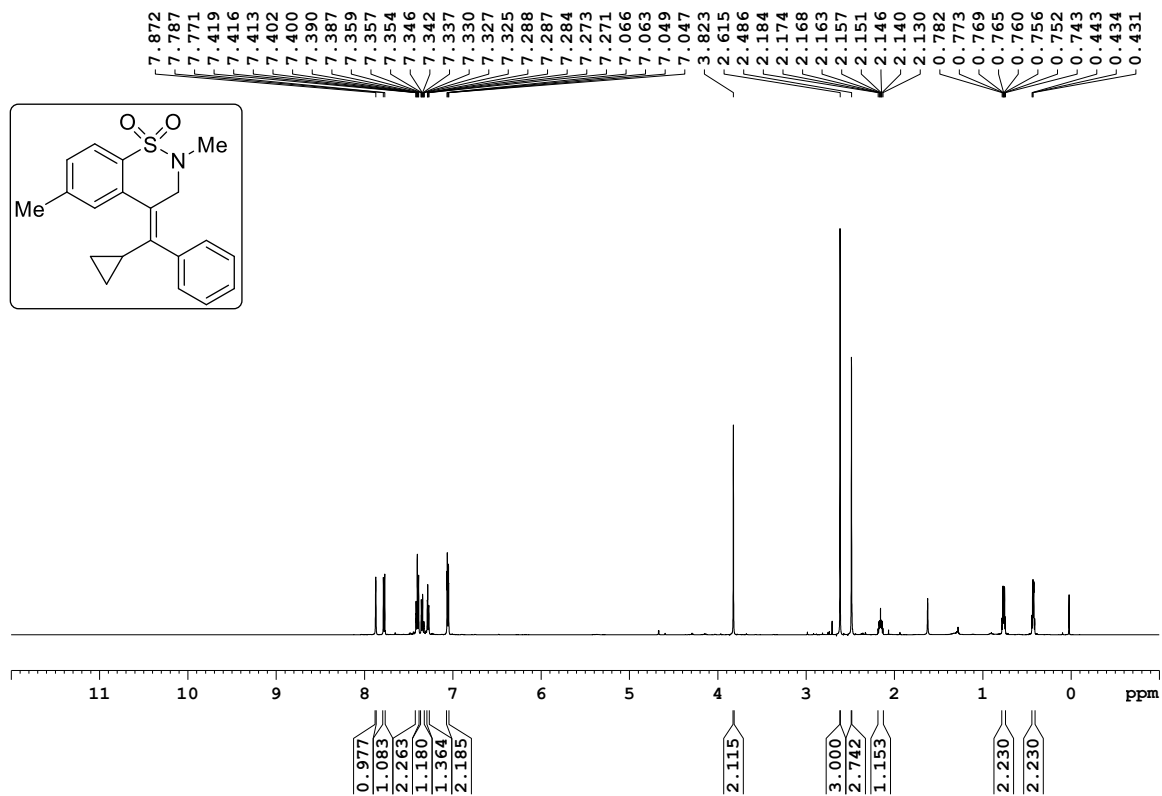

Figure S84. <sup>1</sup>H NMR spectrum of compound 5ah

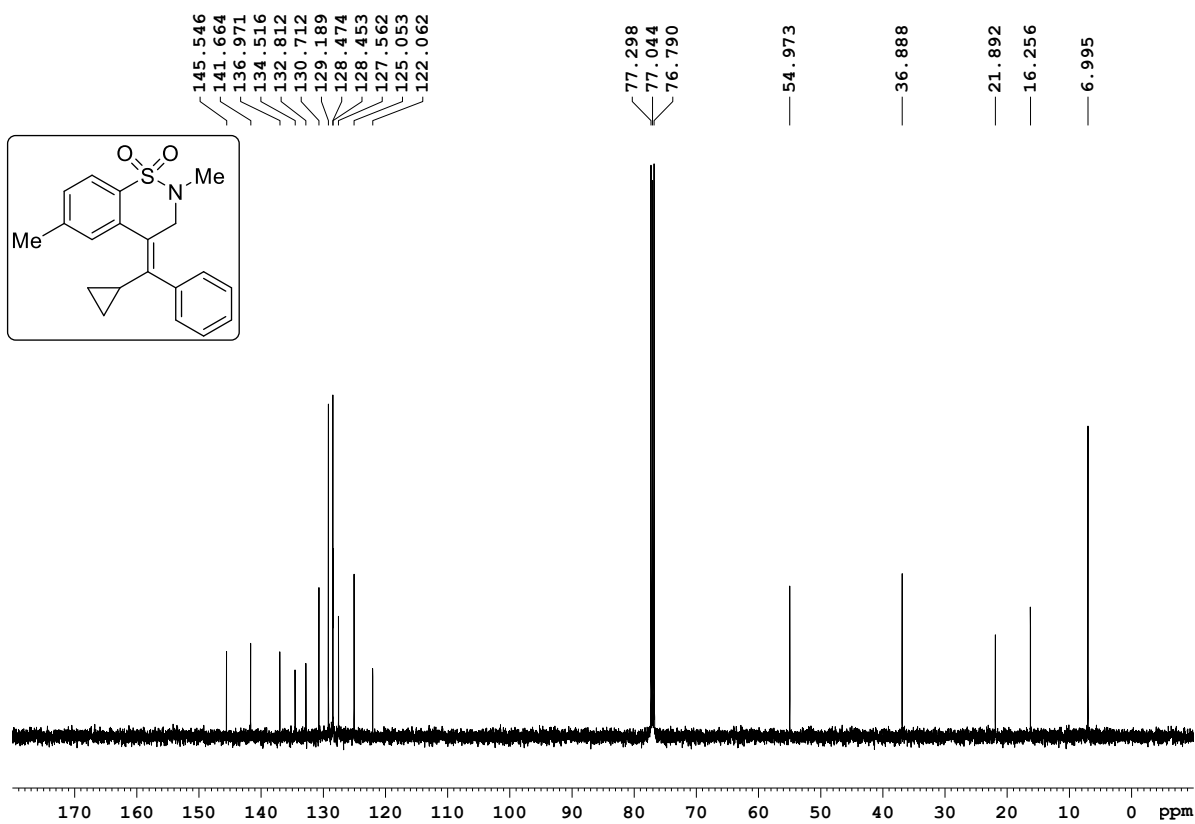

Figure S85. <sup>13</sup>C NMR spectrum of compound 5ah

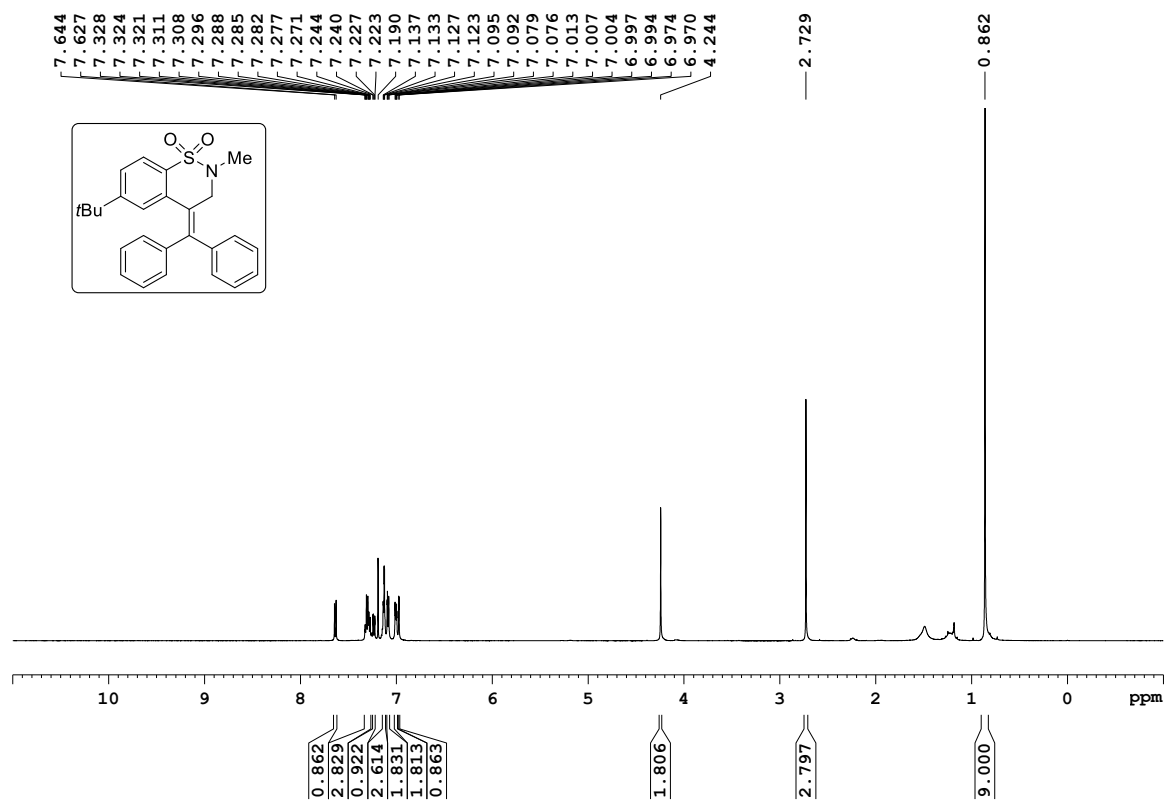

Figure S86. <sup>1</sup>H NMR spectrum of compound 5ba

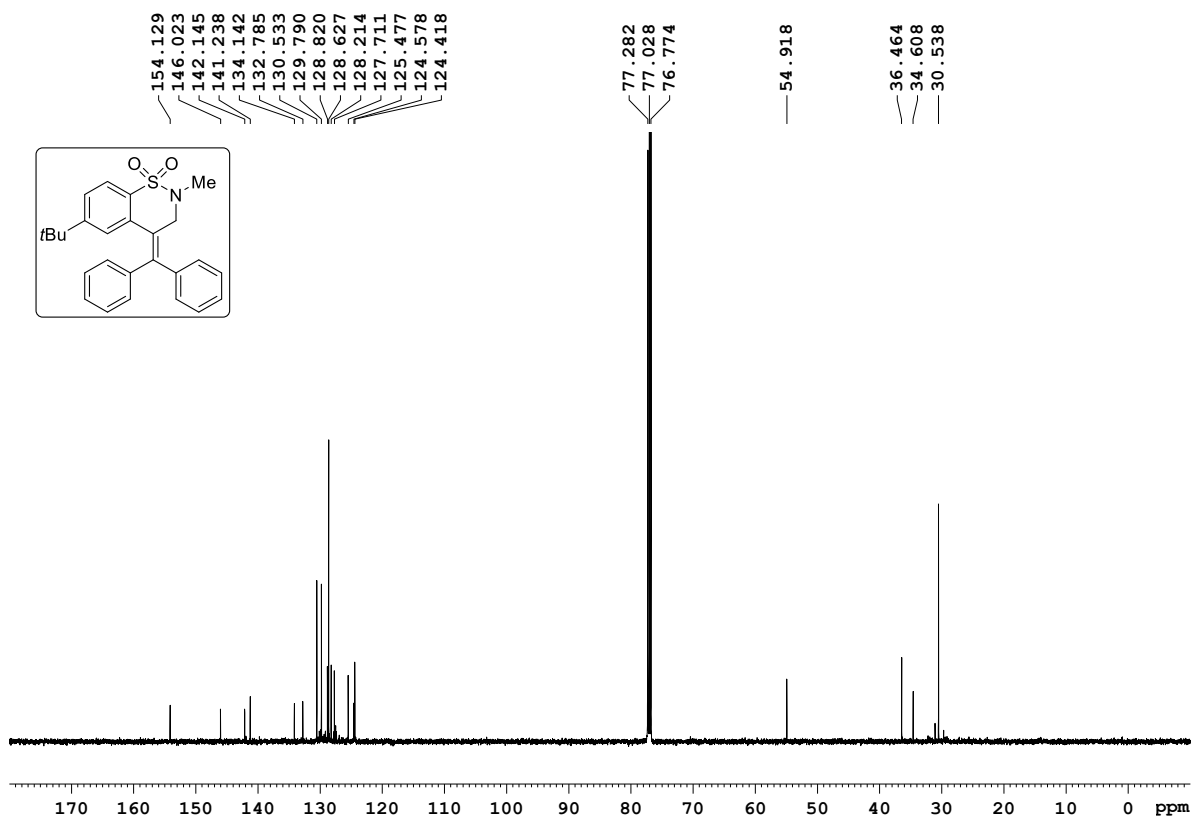

Figure S87. <sup>13</sup>C NMR spectrum of compound 5ba



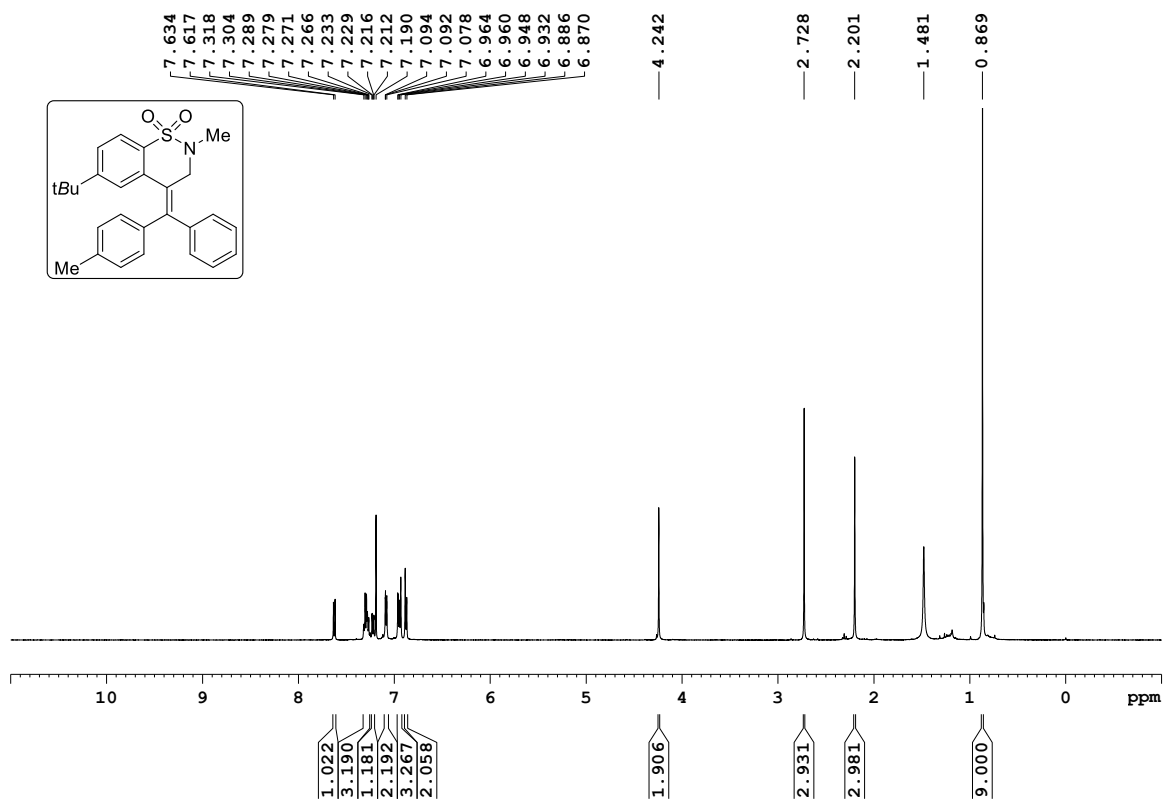

**Figure S88.** <sup>1</sup>H NMR spectrum of compound **5bb**

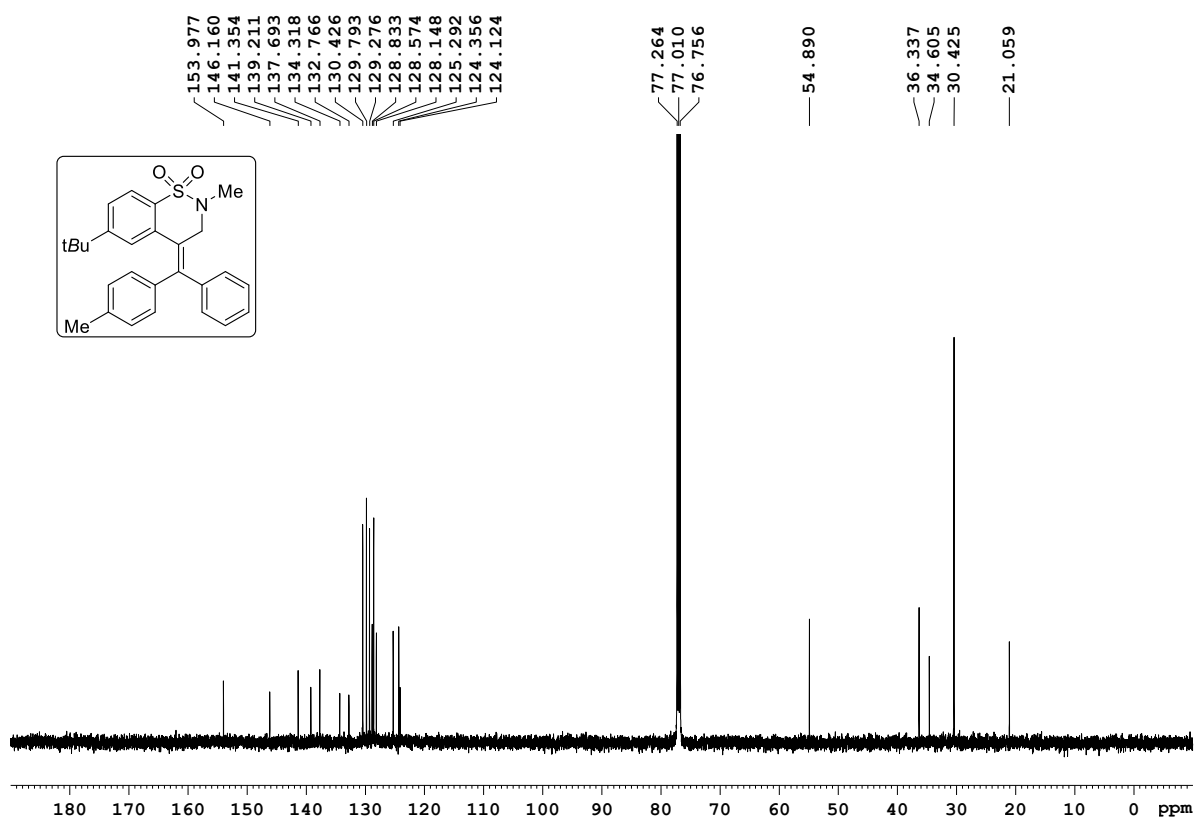

**Figure S89.** <sup>13</sup>C NMR spectrum of compound **5bb**

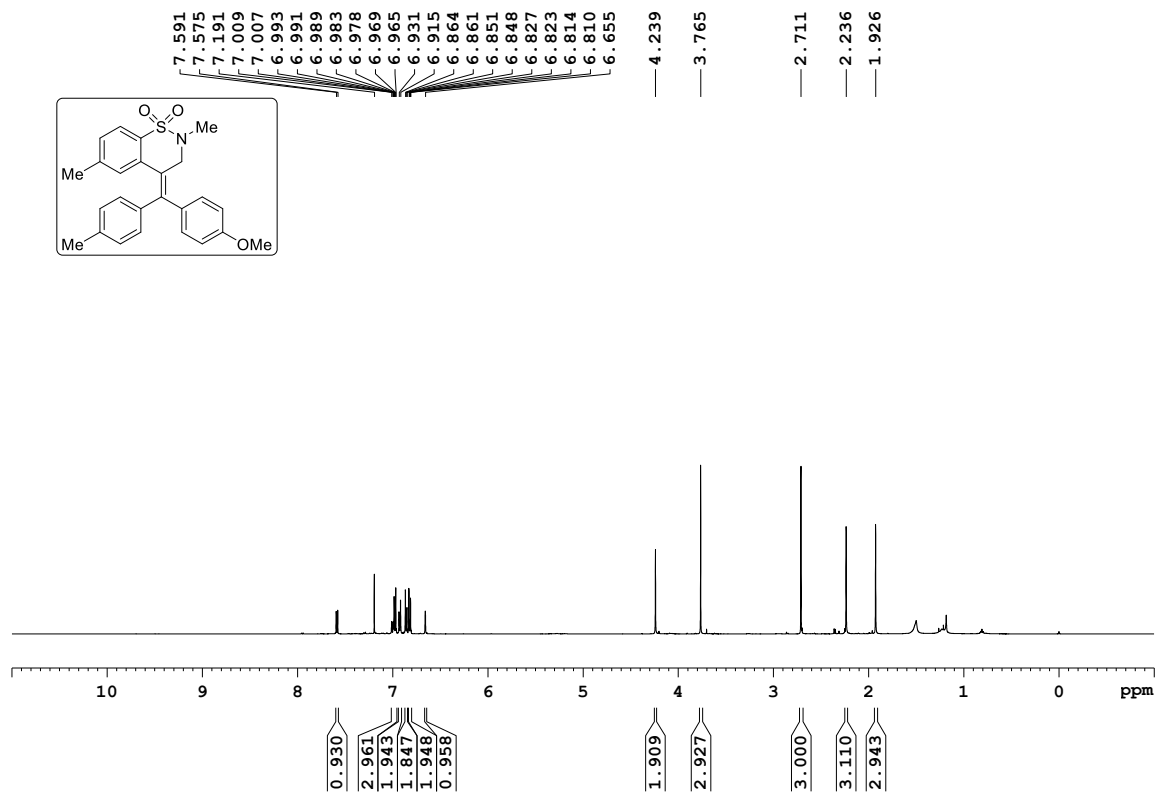

Figure S90. <sup>1</sup>H NMR spectrum of compound 5cb

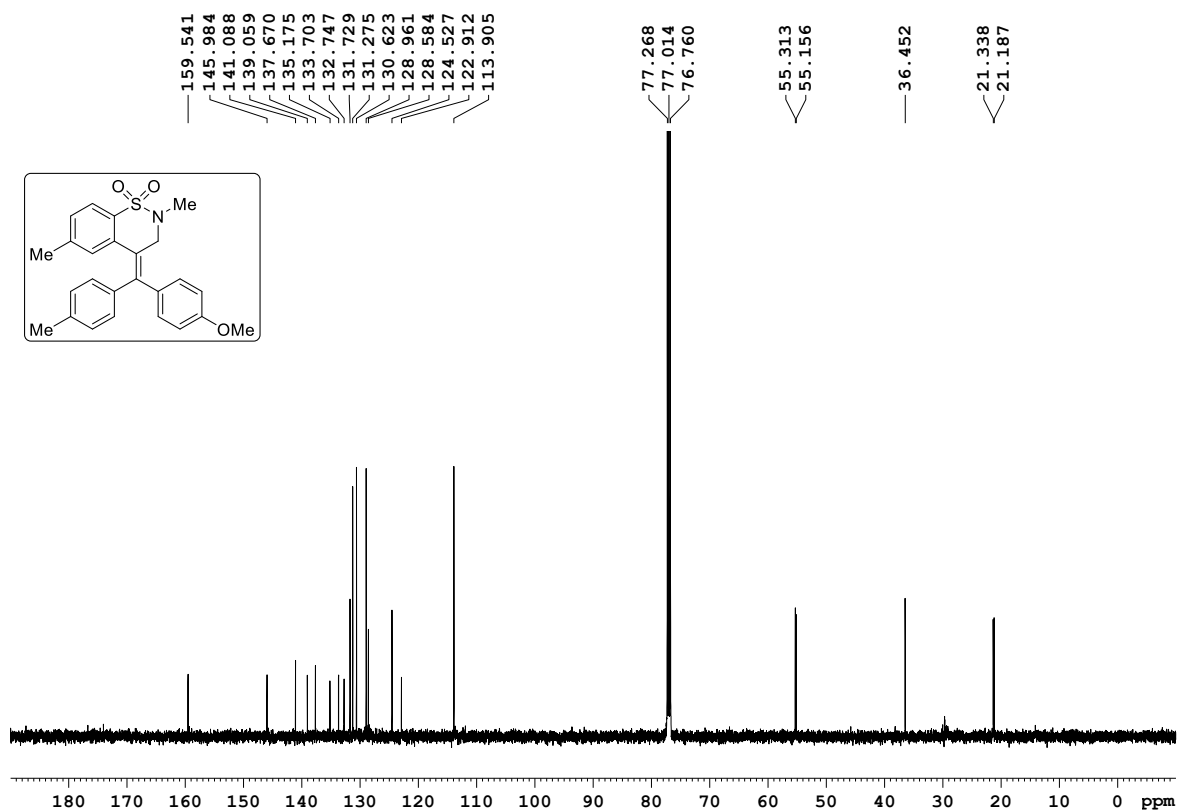

Figure S91. <sup>13</sup>C NMR spectrum of compound 5cb
